# Supplementary material for: Sluggish reactivity by a nonheme iron(iv)-tosylimido complex as compared to its oxo analogue
Source: Royal Society of Chemistry journal article supplement (doi:10.1039/d0dt00018c), 2020-01-01
Supplement: d0dt00018c1.pdf [file d0dt00018c1.pdf]

## Electronic Supplementary Information

# Sluggish Reactivity by a Nonheme Iron(IV)-Tosylimido Complex as Compared to its Oxo Analogue

Gourab Mukherjee,<sup>a</sup> Fabián G. Cantú Reinhard,<sup>b</sup> Umesh Kumar Bagha,<sup>a</sup> Chivukula V. Sastri\*<sup>a</sup>  
and Sam P. de Visser\*<sup>b</sup>

---

<sup>a</sup> Department of Chemistry, Indian Institute of Technology Guwahati, Assam 781039, India.

Fax: +91-361-258-2349;

E-mail: [sastricv@iitg.ernet.in](mailto:sastricv@iitg.ernet.in).

<sup>b</sup> The Manchester Institute of Biotechnology and Department of Chemical Engineering and Analytical Science, The University of Manchester, 131 Princess Street, Manchester M1 7DN, United Kingdom.

E-mail: [sam.devisser@manchester.ac.uk](mailto:sam.devisser@manchester.ac.uk).

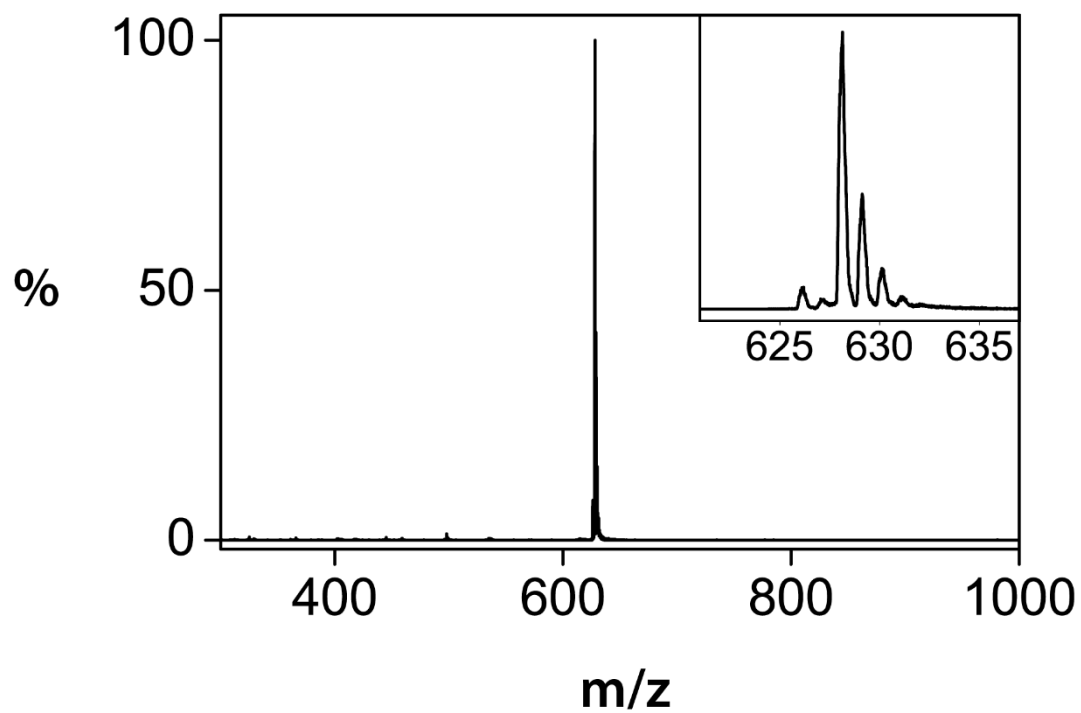

**Fig. S1.** ESI-MS spectrum of  $[\text{Fe}^{\text{II}}(\text{Bntpen})(\text{OTf})]^+$  in  $\text{CH}_3\text{CN}$  at 298 K. Inset shows the isotopic distribution pattern for the peak at  $m/z$  628.11 corresponding to  $[\text{Fe}^{\text{II}}(\text{Bntpen})(\text{OTf})]^+$ .

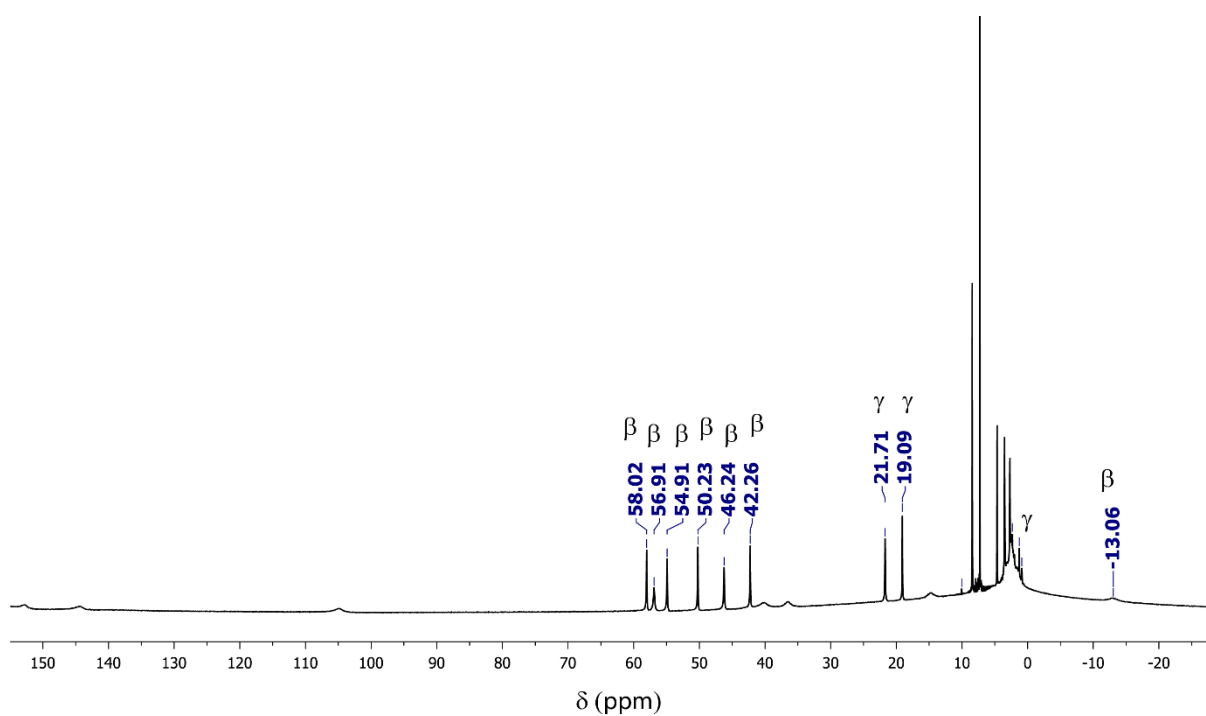

**Fig. S2.** <sup>1</sup>H-NMR (400 MHz) spectrum of the complex, [Fe<sup>II</sup>(Bntpen)(OTf)]<sup>2+</sup> in CDCl<sub>3</sub> at 295 K with a spectral width of ~200 ppm (scans: 128). The peaks have been assigned based of previously reported literature.<sup>1</sup>

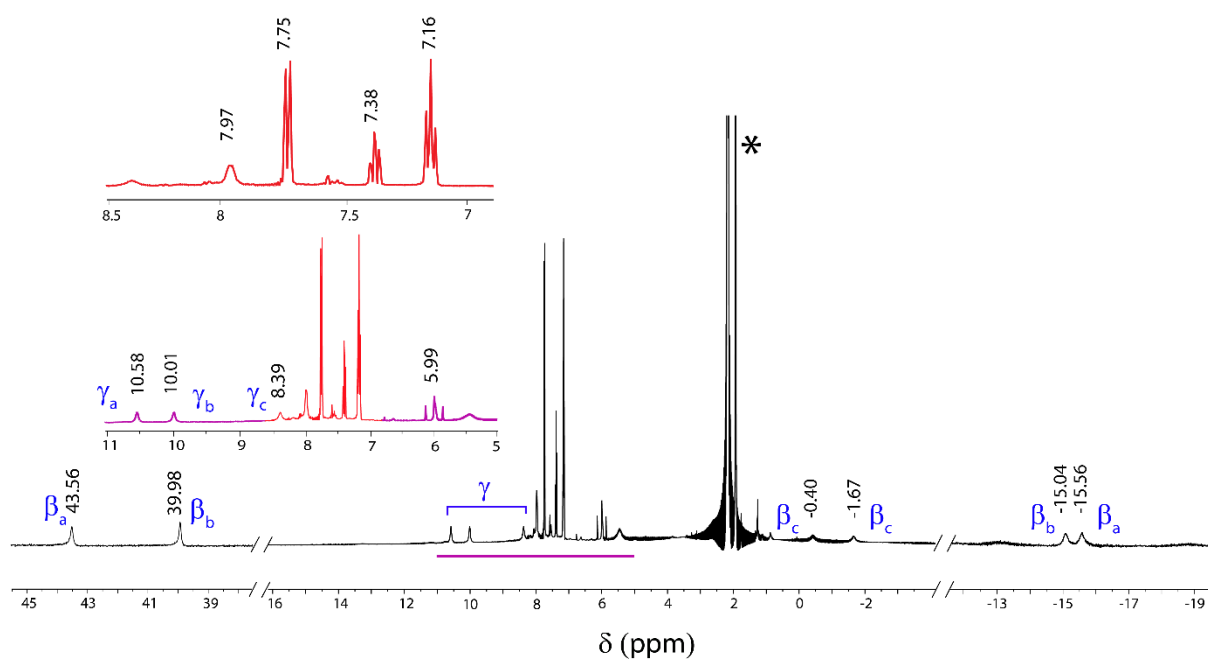

**Fig. S3.**  $^1\text{H-NMR}$  (400 MHz) spectrum of the complex,  $[\text{Fe}^{\text{IV}}(\text{Bntpen})(\text{O})]^{2+}$  (**3**) in  $\text{CD}_3\text{CN}$  at 295 K with a spectral width of  $\sim 200$  ppm (scans: 256). The peaks have been assigned based on previously reported literature.<sup>2</sup> Residual solvent peaks are denoted by \*.

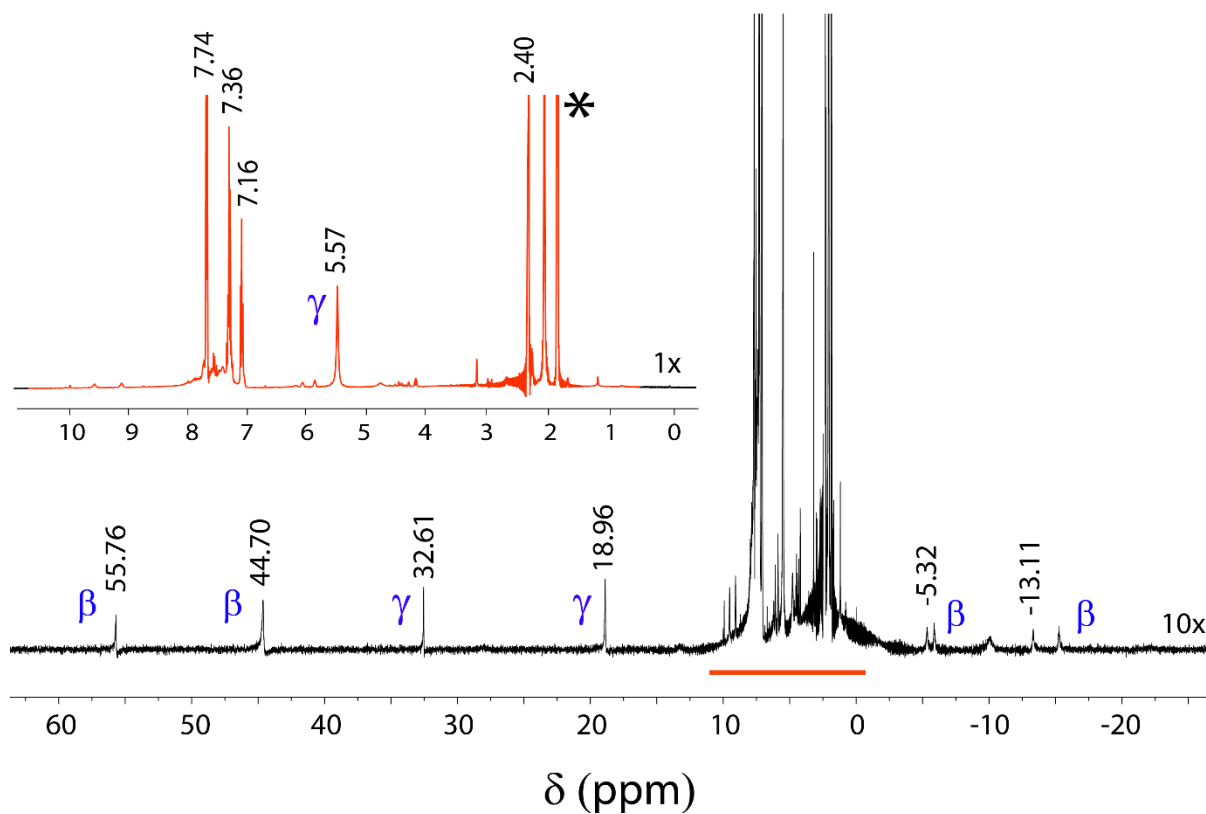

**Fig. S4.** <sup>1</sup>H-NMR (400 MHz) spectrum of the complex,  $[\text{Fe}^{\text{IV}}(\text{Bntpen})(\text{NTs})]^{2+}$  (**4**) in  $\text{CD}_3\text{CN}$  at 295 K with a spectral width of  $\sim 200$  ppm (scans: 256). The peaks have been assigned based on previously reported literature.<sup>2d,3</sup> Peaks at  $\delta$  7.74 and  $\delta$  7.36 ppm correspond to tosyl resonances belonging to the tosylimide ligated to the iron centre as reported for similar  $\text{Fe}(\text{IV})=\text{NTs}$  complex, **2**.<sup>3</sup> The <sup>1</sup>H-NMR spectrum of the oxidant, PhINTs, is reported to signal at  $\delta$  2.30 ppm ( $\text{CH}_3$ ) and  $\delta$  7.00-7.80 ppm (aromatic protons)<sup>4</sup>. Residual solvent peaks are denoted by \*.

### FTIR Spectroscopy:

FTIR spectra were recorded on a Perkin Elmer FTIR spectrometer at 298 K. The Fe(IV)=O stretching vibrations are usually around 830-850  $\text{cm}^{-1}$ . However, the resonance RAMAN studies on **2** indicates signals at around 998  $\text{cm}^{-1}$  corresponding to the Fe=N stretching vibration.<sup>2d</sup> Similar Fe(IV)=NTs complexes like  $[\text{Fe}^{\text{IV}}(\text{NTs})(\text{MePy}_2\text{tacn})](\text{OTf})_2$  and  $[\text{Fe}^{\text{IV}}(\text{NTs})(\text{Me}_2(\text{CHPy}_2)\text{tacn})](\text{OTf})_2$  with pentadentate ligand frameworks have shown stretching vibrations around 984  $\text{cm}^{-1}$ .<sup>2d</sup> The FTIR spectrum shown here for **4** shows transmittance at 997  $\text{cm}^{-1}$ , for the Fe=N vibration.

519  $\text{cm}^{-1}$  (strong,  $\text{CF}_3$  asy. str.), 665  $\text{cm}^{-1}$  (strong, S-N str.), 764  $\text{cm}^{-1}$  (strong,  $\text{CF}_3$  sym. str.), 997  $\text{cm}^{-1}$  (shoulder, Fe=N str.), 1030  $\text{cm}^{-1}$  (very strong,  $\text{SO}_2$  str.), 1275  $\text{cm}^{-1}$  (very strong,  $\text{SO}_3$  asy. str.), 1330  $\text{cm}^{-1}$  (strong,  $\text{SO}_2$  asy. str.).

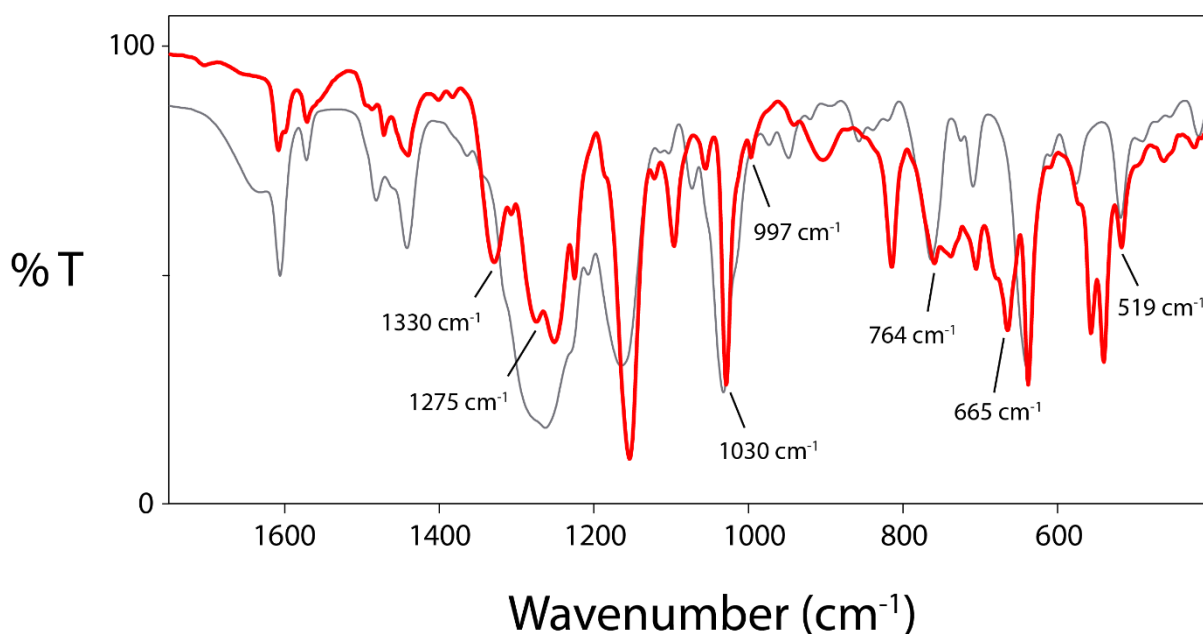

**Fig. S5.** FTIR spectra of complex  $[\text{Fe}^{\text{IV}}(\text{NTs})(\text{Bntpen})]^{2+}$ , **4** (red line) in  $\text{CH}_3\text{CN}$  at 298 K. Black line shows the same for the Fe(II)-complex,  $[\text{Fe}^{\text{II}}(\text{Bntpen})(\text{OTf})]^+$ . The peak at 997  $\text{cm}^{-1}$  is assigned to the Fe=N stretching frequency in **4**.

**Table S1.** Pseudo first-order and second-order rate constants determined for the reaction of **4** with *para*-X-thioanisole at 298 K.

| X =  | Concentration (mM) | $k_{\text{obs}} (\text{s}^{-1}) \times 10^{-3}$ | $k_2 (\text{M}^{-1} \text{s}^{-1}) \times 10^{-2}$ |
|------|--------------------|-------------------------------------------------|----------------------------------------------------|
| -OMe | 5                  | 23.50                                           | 541.4                                              |
|      | 10                 | 52.16                                           |                                                    |
|      | 15                 | 76.57                                           |                                                    |
|      | 20                 | 113.63                                          |                                                    |
| -Me  | 20                 | 4.25                                            | 22.9                                               |
|      | 30                 | 7.04                                            |                                                    |
|      | 40                 | 9.25                                            |                                                    |
|      | 50                 | 11.63                                           |                                                    |
| -H   | 50                 | 2.28                                            | 5.4                                                |
|      | 100                | 4.51                                            |                                                    |
|      | 150                | 8.04                                            |                                                    |
|      | 200                | 11.33                                           |                                                    |
| -Cl  | 50                 | 1.22                                            | 2.7                                                |
|      | 100                | 2.42                                            |                                                    |
|      | 150                | 3.68                                            |                                                    |
|      | 200                | 5.83                                            |                                                    |

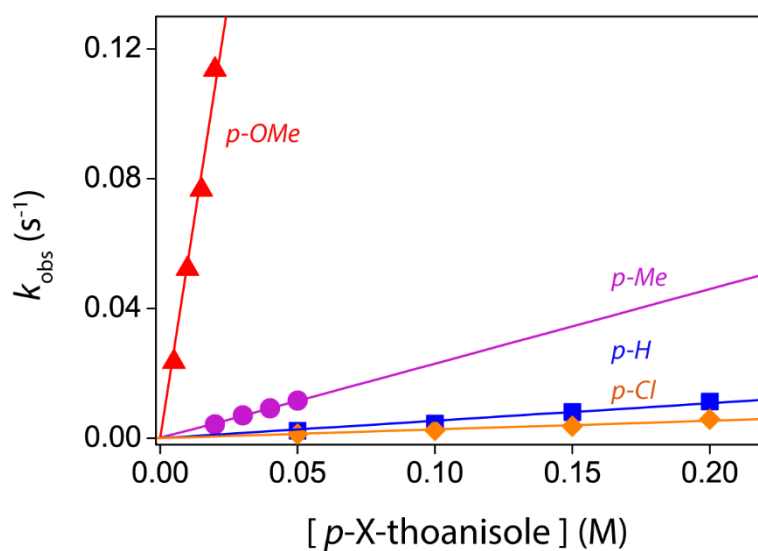

**Fig. S6.** Plot of  $k_{\text{obs}}$  against substrate concentration to determine second-order rate constants for the reactions of **4** (1mM) with *para*-X-thioanisole (X = -OMe ▲, -Me ●, -H ■, -Cl ◆) in  $\text{CH}_3\text{CN}$  at 298 K.

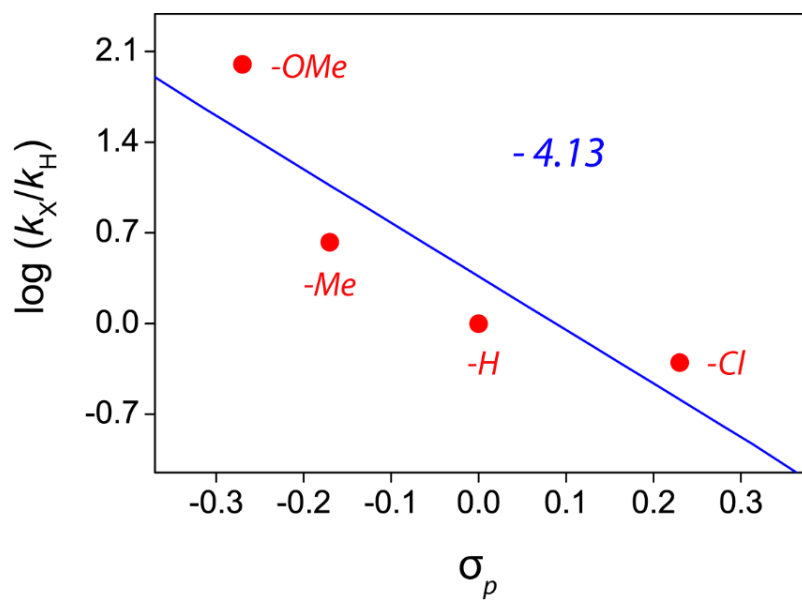

**Fig. S7.** Hammett plot obtained by plotting the  $\log(k_X/k_H)$  values against  $\sigma_p$  values<sup>5</sup> of *para*-X-thioanisole (X = OMe, Me, H and Cl) substrates for their reaction with **4** in  $\text{CH}_3\text{CN}$  at 298 K.



**Table S2. Second-order rate constant ( $k_2$ ) determined in the reaction of 3 (1 mM) and 4 (1 mM) with benzyl alcohol in CH<sub>3</sub>CN at 298 K.**

| [Benzyl alcohol] (mM)                       | 3                                               | [Benzyl alcohol] (mM)                       | 4                                               |
|---------------------------------------------|-------------------------------------------------|---------------------------------------------|-------------------------------------------------|
|                                             | $k_{\text{obs}} (\text{s}^{-1}) \times 10^{-3}$ |                                             | $k_{\text{obs}} (\text{s}^{-1}) \times 10^{-3}$ |
| 20                                          | 21.98                                           | 200                                         | 0.73                                            |
| 40                                          | 44.97                                           | 300                                         | 1.06                                            |
| 60                                          | 70.57                                           | 400                                         | 1.67                                            |
| 80                                          | 92.55                                           | -                                           | -                                               |
| $k_2 = 1.156 \text{ M}^{-1} \text{ s}^{-1}$ |                                                 | $k_2 = 0.004 \text{ M}^{-1} \text{ s}^{-1}$ |                                                 |

**Table S3. Pseudo first-order rate constant ( $k_{\text{obs}}$ ) for the reaction of 1 mM of [Fe<sup>IV</sup>(NTs)(Bntpen)]<sup>2+</sup> (4) with excess benzyl alcohol and benzyl alcohol-D<sub>7</sub> at 298 K.**

| Complex | Substrate concentration [300 mM] |                                 | KIE |
|---------|----------------------------------|---------------------------------|-----|
|         | Benzyl alcohol                   | Benzyl alcohol – D <sub>7</sub> |     |
| 4       | $1.064 \times 10^{-3}$           | $2.814 \times 10^{-4}$          | 4   |

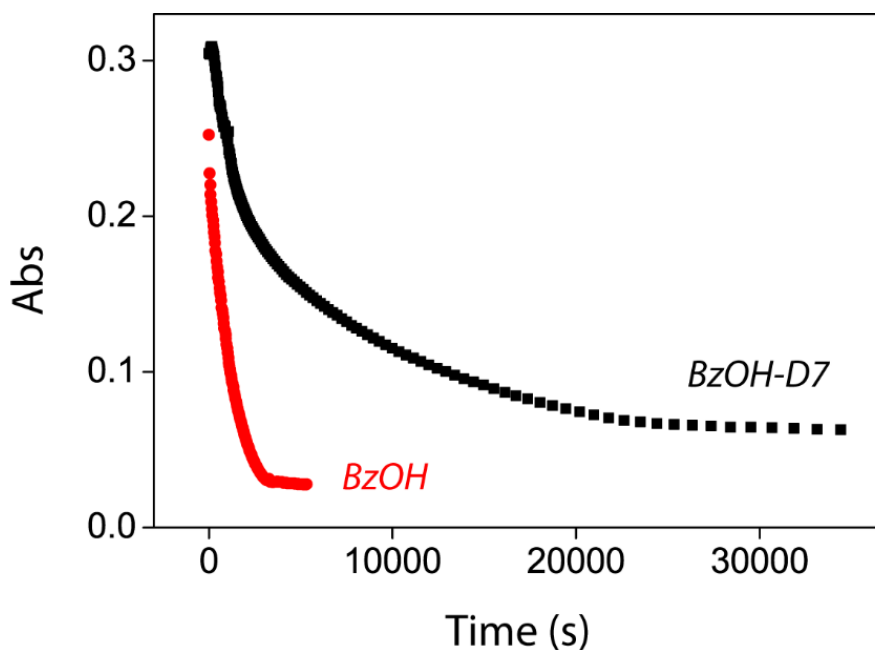

**Fig. S8.** Decay profile for the reaction of  $[\text{Fe}^{\text{IV}}(\text{NTs})(\text{Bntpen})]^{2+}$  (1 mM) with 300 equivalents of benzyl alcohol (BzOH, ●) and benzyl alcohol- $\text{D}_7$  (BzOH- $\text{D}_7$ , ■) in  $\text{CH}_3\text{CN}$  at 298 K.

**Table S4.** Hammett parameters and second-order rate constants ( $k_2$ ) determined for the reaction of **3** (1 mM) with various *para*-substituted benzyl alcohols in  $\text{CH}_3\text{CN}$  at 298 K.<sup>a</sup>

| <i>p</i> -X-benzyl alcohol | $\sigma_p^b$ | $\sigma_p^{+b}$ | $k_2$ ( $\text{M}^{-1} \text{s}^{-1}$ ) | $k_x/k_H^c$ | $\log(k_x/k_H)$ |
|----------------------------|--------------|-----------------|-----------------------------------------|-------------|-----------------|
| -OMe                       | -0.27        | -0.78           | 0.865                                   | 1.469       | 0.167           |
| -Me                        | -0.17        | -0.31           | 0.623                                   | 1.058       | 0.024           |
| -H                         | 0.00         | 0.00            | 0.589                                   | 1.000       | 0.000           |
| -Cl                        | 0.23         | 0.11            | 0.371                                   | 0.628       | -0.202          |

<sup>a</sup> All the reactions were followed by monitoring the UV/Vis spectral changes of the reaction solution.

<sup>b</sup> Data taken from ref. 5.

<sup>c</sup> Relative rate constant obtained by dividing the  $k_2$  of *p*-X-benzyl alcohol by  $k_2$  of *p*-H-benzyl alcohol.

Computational data:

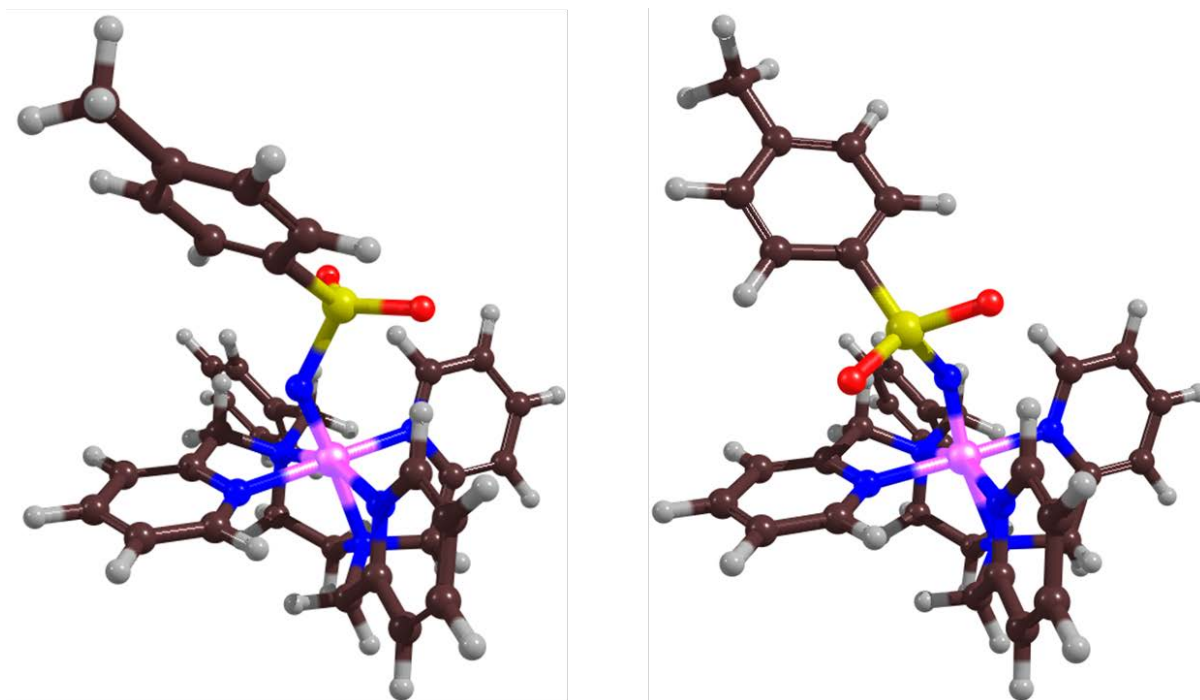

**Fig. S9.** UB3LYP/BS1 optimized structures of  $^1[\text{Fe}^{\text{IV}}(\text{NTs})(\text{Bntpen})]^{2+}$  conformers, **14a** (left) vs **14b** (right, ground state).

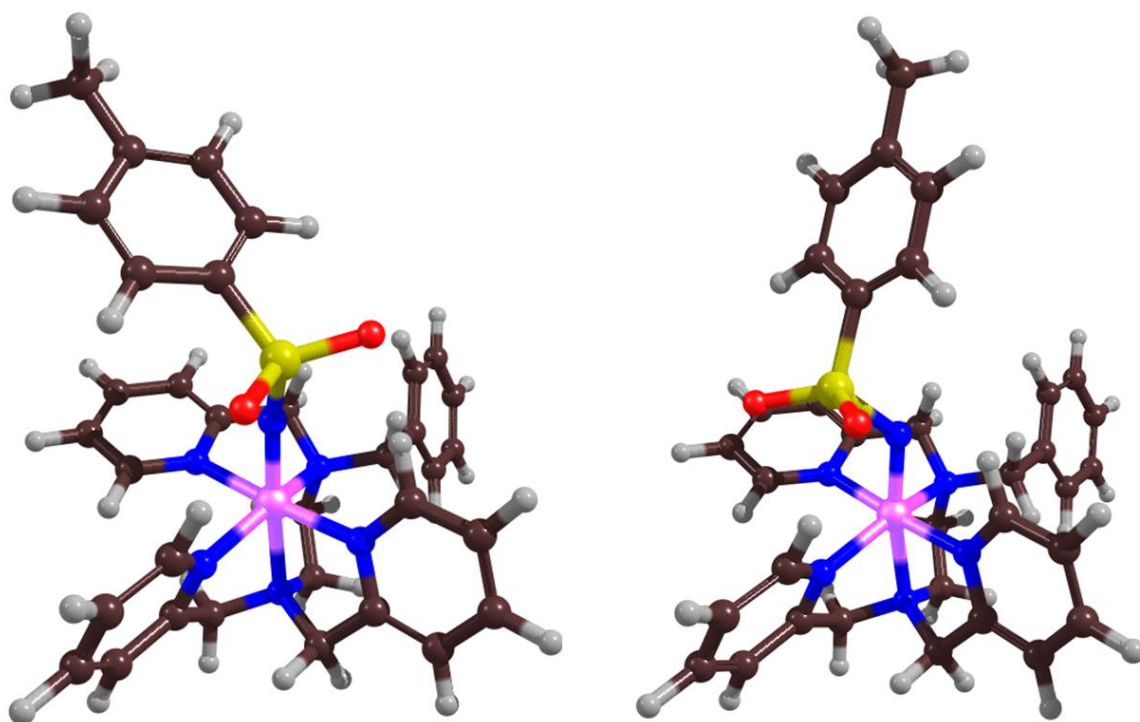

**Fig. S10.** UB3LYP/BS1 optimized structures of  $^3[\text{Fe}^{\text{IV}}(\text{NTs})(\text{Bntpen})]^{2+}$  conformers, **34a** (left) vs **34b** (right, ground state).

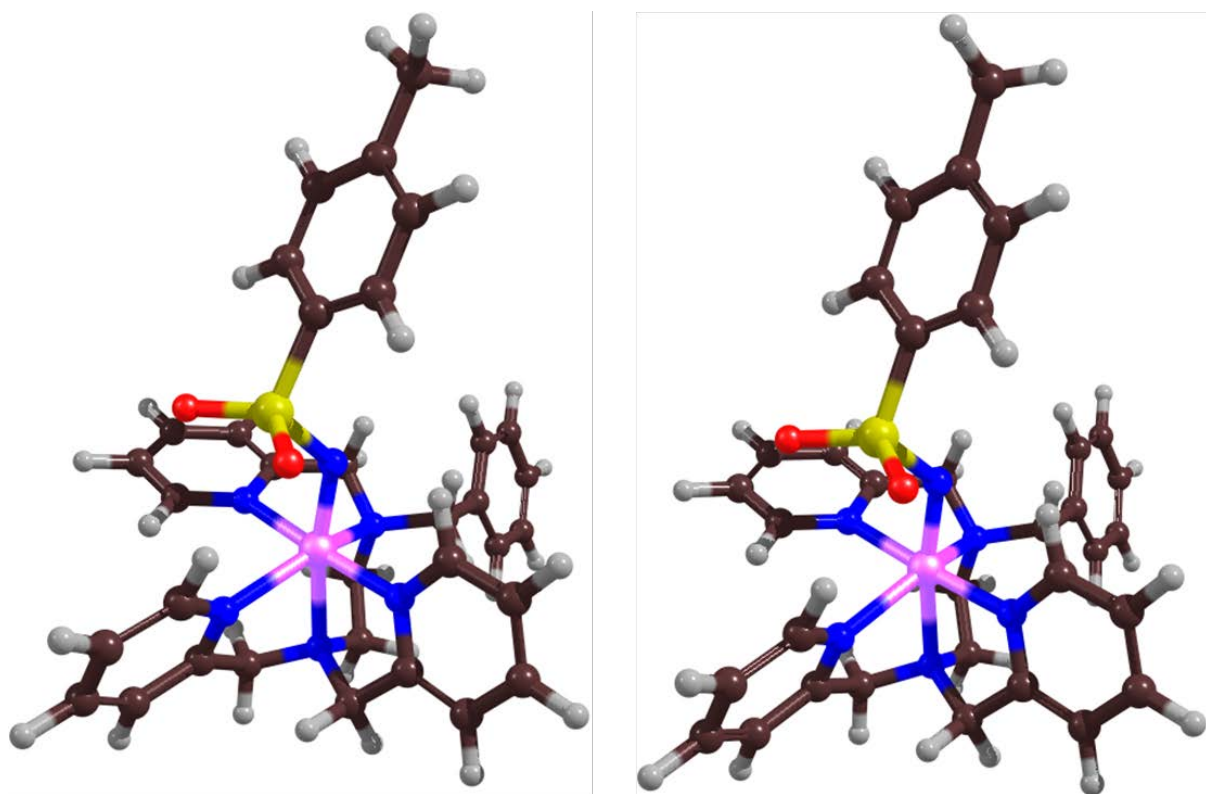

**Fig. S11.** UB3LYP/BS1 optimized structures of  $^5[\text{Fe}^{\text{IV}}(\text{NTs})(\text{Bntpen})]^{+2}$  conformers, **54a** (left) vs **54b** (right). In this multiplicity, the first conformer fell to the alternate configuration during the geometry optimization, maintaining only a rotation on the terminal methyl group.

**Table S5:** Absolute energies, zero-point energies and free energies (in au) of  $^{1,3,5}\text{[Fe}^{\text{IV}}(\text{NTs})(\text{Bntpen})]^{2+}$  conformers (UB3LYP/BS2//UB3LYP/BS1):

| System                                                                      | BS1          | BS1          | BS1          | BS2          | BS2+Solvent  | BS2+Solvent  |
|-----------------------------------------------------------------------------|--------------|--------------|--------------|--------------|--------------|--------------|
|                                                                             | E            | E+ZPE        | G            | E            | E            | E+ZPE        |
| $^1\text{[Fe}^{\text{IV}}(\text{NTs})(\text{Bntpen})]^{2+}$<br>Conformer 4a | -2316.747088 | -2316.087420 | -2316.158078 | -2317.760018 | -2317.954766 | -2317.295099 |
| $^1\text{[Fe}^{\text{IV}}(\text{NTs})(\text{Bntpen})]^{2+}$<br>Conformer 4b | -2316.756303 | -2316.097270 | -2316.169344 | -2317.768880 | -2317.963659 | -2317.304626 |
| $^3\text{[Fe}^{\text{IV}}(\text{NTs})(\text{Bntpen})]^{2+}$<br>Conformer 4a | -2316.760333 | -2316.101261 | -2316.173477 | -2317.781553 | -2317.978599 | -2317.319527 |
| $^3\text{[Fe}^{\text{IV}}(\text{NTs})(\text{Bntpen})]^{2+}$<br>Conformer 4b | -2316.767133 | -2316.108765 | -2316.181305 | -2317.788015 | -2317.983413 | -2317.325044 |
| $^5\text{[Fe}^{\text{IV}}(\text{NTs})(\text{Bntpen})]^{2+}$<br>Conformer 4a | -2316.758460 | -2316.102277 | -2316.175878 | -2317.786669 | -2317.979395 | -2317.323211 |
| $^5\text{[Fe}^{\text{IV}}(\text{NTs})(\text{Bntpen})]^{2+}$<br>Conformer 4b | -2316.758586 | -2316.102211 | -2316.177522 | -2317.786538 | -2317.979154 | -2317.322779 |

**Table S6:** Relative energies (in kcal mol $^{-1}$ ) of  $^{1,3,5}\text{[Fe}^{\text{IV}}(\text{NTs})(\text{Bntpen})]^{2+}$  conformers as calculated at UB3LYP/BS2//UB3LYP/BS1 in Gaussian:

| System                                                                      | BS1   | BS1   | BS1   | BS2   | BS2+Solvent | BS2+Solvent |
|-----------------------------------------------------------------------------|-------|-------|-------|-------|-------------|-------------|
|                                                                             | E     | E+ZPE | G     | E     | E           | E+ZPE       |
| $^1\text{[Fe}^{\text{IV}}(\text{NTs})(\text{Bntpen})]^{2+}$<br>Conformer 4a | 12.58 | 13.39 | 14.58 | 17.57 | 17.98       | 18.79       |
| $^1\text{[Fe}^{\text{IV}}(\text{NTs})(\text{Bntpen})]^{2+}$<br>Conformer 4b | 6.80  | 7.21  | 7.51  | 12.01 | 12.40       | 12.81       |
| $^3\text{[Fe}^{\text{IV}}(\text{NTs})(\text{Bntpen})]^{2+}$<br>Conformer 4a | 4.27  | 4.71  | 4.91  | 4.05  | 3.02        | 3.46        |
| $^3\text{[Fe}^{\text{IV}}(\text{NTs})(\text{Bntpen})]^{2+}$<br>Conformer 4b | 0.00  | 0.00  | 0.00  | 0.00  | 0.00        | 0.00        |
| $^5\text{[Fe}^{\text{IV}}(\text{NTs})(\text{Bntpen})]^{2+}$<br>Conformer 4a | 5.44  | 4.07  | 3.41  | 0.84  | 2.52        | 1.15        |
| $^5\text{[Fe}^{\text{IV}}(\text{NTs})(\text{Bntpen})]^{2+}$<br>Conformer 4b | 5.36  | 4.11  | 2.37  | 0.93  | 2.67        | 1.42        |

**Table S7:** Absolute energies, zero-point energies and free energies (in au) of the reaction of  $^3[\text{Fe}^{\text{IV}}(\text{NTs})(\text{Bntpen})]^{2+}$  with CHD and DMS as calculated at UB3LYP/BS2//UB3LYP/BS1 in Gaussian:

| System                                                                    | BS1          | BS1          | BS1          | BS2          | BS2+Solvent  | BS2+Solvent  |
|---------------------------------------------------------------------------|--------------|--------------|--------------|--------------|--------------|--------------|
|                                                                           | E            | E+ZPE        | G            | E            | E            | E+ZPE        |
| $^3[\text{Fe}^{\text{IV}}(\text{O})(\text{Bntpen})]^{2+}$<br>Conformer 4b | -2316.767133 | -2316.108765 | -2316.181305 | -2317.788015 | -2317.983413 | -2317.325044 |
| Isolated CHD                                                              | -233.3654783 | -233.2417720 | -233.2700250 | -233.4714593 | -233.4737984 | -233.3500922 |
| Isolated DMS                                                              | -477.9683283 | -477.8917730 | -477.9191340 | -478.0558687 | -478.0597978 | -477.9832425 |
| $^3\text{CHD\_RC}$                                                        | -2550.136246 | -2549.353602 | -2549.439580 | -2551.260678 | -2551.454512 | -2550.671868 |
| $^3\text{CHD\_TS1}$                                                       | -2550.121438 | -2549.342958 | -2549.422249 | -2551.237799 | -2551.426569 | -2550.648089 |
| $^3\text{CHD\_IR1}$                                                       | -2550.163508 | -2549.381481 | -2549.465509 | -2551.290150 | -2551.484257 | -2550.702230 |
| $^3\text{CHD\_Prd}$                                                       | -2550.246871 | -2549.463347 | -2549.548443 | -2551.370938 | -2551.556669 | -2550.773145 |
| $^3\text{DMS\_RC}$                                                        | -2794.745784 | -2794.009761 | -2794.094298 | -2795.852637 | -2796.042962 | -2795.306940 |
| $^3\text{DMS\_TS}$                                                        | -2794.713449 | -2793.978496 | -2794.059186 | -2795.816205 | -2796.002396 | -2795.267443 |
| $^3\text{DMS\_Prd}$                                                       | -2794.765829 | -2794.030557 | -2794.114240 | -2795.882169 | -2796.057584 | -2795.322312 |
| $^3\text{DMS\_Prd Alternative}$                                           | -2794.741713 | -2794.006349 | -2794.092307 | -2795.860315 | -2796.048643 | -2795.313280 |
| $^3\text{CHD\_TS1\_Deuterium1}$                                           | -2550.121438 | -2549.344828 | -2549.424178 | -2551.237799 | -2551.426569 | -2550.649959 |
| $^3\text{CHD\_TS1\_Deuterium2}$                                           | -2550.121438 | -2549.346334 | -2549.425700 | -2551.237799 | -2551.426569 | -2550.651465 |
| $^5\text{DMS\_RC}$                                                        | -2794.737517 | -2794.003688 | -2794.092102 | -2795.851566 | -2796.038992 | -2795.305163 |
| $^5\text{DMS\_TS1}$                                                       | -2794.744280 | -2794.010841 | -2794.094415 | -2795.854501 | -2796.034029 | -2795.300590 |
| $^5\text{DMS\_Prd}$                                                       | -2794.787983 | -2794.054197 | -2794.140388 | -2795.907855 | -2796.082901 | -2795.349115 |
| Isolated CHD Deuterium 1                                                  | -233.3654783 | -233.2450530 | -233.2734320 | -233.4714593 | -233.4737984 | -233.353373  |
| Isolated CHD Deuterium 2                                                  | -233.3654783 | -233.2451330 | -233.2735070 | -233.4714593 | -233.4737984 | -233.353453  |

**Table S8:** Relative energies (in kcal mol<sup>-1</sup>) of the reaction of  $^3[\text{Fe}^{\text{IV}}(\text{NTs})(\text{Bntpen})]^{2+}$  with CHD and DMS as calculated at UB3LYP/BS2//UB3LYP/BS1 in Gaussian:

| System                          | BS1   | BS1   | BS1   | BS2   | BS2+Solvent | BS2+Solvent |
|---------------------------------|-------|-------|-------|-------|-------------|-------------|
|                                 | SCF   | E+ZPC | G     | SCF   | SCF         | E+ZPC       |
| $^3\text{CHD\_RC}$              | -2.3  | -1.9  | 7.4   | -0.8  | 1.7         | 2.1         |
| $^3\text{CHD\_TS1}$             | 7.0   | 4.8   | 18.2  | 13.6  | 19.2        | 17.0        |
| $^3\text{CHD\_IR1}$             | -19.4 | -19.4 | -8.9  | -19.2 | -17.0       | -17.0       |
| $^3\text{CHD\_Prd}$             | -71.7 | -70.8 | -60.9 | -69.9 | -62.4       | -61.5       |
| $^3\text{DMS\_RC}$              | -6.5  | -5.8  | 3.9   | -5.5  | 0.2         | 0.8         |
| $^3\text{DMS\_TS}$              | 13.8  | 13.8  | 25.9  | 17.4  | 25.6        | 25.6        |
| $^3\text{DMS\_Prd}$             | -19.1 | -18.8 | -8.7  | -24.0 | -9.0        | -8.8        |
| $^3\text{DMS\_Prd Alternative}$ | -3.9  | -3.6  | 5.1   | -10.3 | -3.4        | -3.1        |
| $^5\text{DMS\_RC}$              | -1.3  | -2.0  | 5.2   | -4.8  | 2.6         | 2.0         |
| $^5\text{DMS\_TS1}$             | -5.5  | -6.5  | 3.8   | -6.7  | 5.8         | 4.8         |
| $^5\text{DMS\_Prd}$             | -33.0 | -33.7 | -25.1 | -40.1 | -24.9       | -25.6       |

**Table S9:** Kinetic Isotope Effects of CHD Reactions with  $^3[\text{Fe}^{\text{IV}}(\text{NTs})(\text{Bntpen})]^{2+}$  (UB3LYP/BS1) for the transition state for  $\text{Fe}(\text{NTS})-\text{H}^1-\text{CH}^2\text{R}$ :

| Kinetic Isotope Effects            | i Frequency | KIE Eyring | KIE Wigner |
|------------------------------------|-------------|------------|------------|
| $^3\text{CHD\_TS1\_H}^1\text{H}^2$ | 842.3       |            |            |
| $^3\text{CHD\_TS1\_D}^1\text{H}^2$ | 663.0       | 4.79       | 5.66       |
| $^3\text{CHD\_TS1\_H}^1\text{D}^2$ | 824.2       | 1.03       | 1.05       |

**Table S10:** Spin densities of key fragments of intermediates and transition states along the reaction of  $^3[\text{Fe}^{\text{IV}}(\text{NTs})(\text{Bntpen})]^{2+}$  at the UB3LYP/BS1//BS2//BS2+Solvent levels of theory:

| $^3\text{CHD\_RC}$               | Fragment      | BS1   | BS2   | BS2+Solvent |
|----------------------------------|---------------|-------|-------|-------------|
|                                  | Fe            | 0.98  | 0.90  | 0.97        |
|                                  | (NTs)(Bntpen) | 1.02  | 1.10  | 1.03        |
|                                  | Substrate     | 0.00  | 0.00  | 0.00        |
|                                  | Total         | 2.00  | 2.00  | 2.00        |
| $^3\text{CHD\_TS1}$              | Fragment      | BS1   | BS2   | BS2+Solvent |
|                                  | Fe            | 0.65  | 0.63  | 0.74        |
|                                  | (NTs)(Bntpen) | 0.72  | 0.78  | 0.64        |
|                                  | Substrate     | 0.63  | 0.59  | 0.62        |
|                                  | Total         | 2.00  | 2.00  | 2.00        |
| $^3\text{CHD\_IR1}$              | Fragment      | BS1   | BS2   | BS2+Solvent |
|                                  | Fe            | 0.86  | 0.86  | 0.92        |
|                                  | (NTs)(Bntpen) | 0.16  | 0.14  | 0.08        |
|                                  | Substrate     | 0.98  | 1.00  | 1.00        |
|                                  | Total         | 2.00  | 2.00  | 2.00        |
| $^3\text{CHD\_Prd}$              | Fragment      | BS1   | BS2   | BS2+Solvent |
|                                  | Fe            | 2.00  | 1.95  | 1.95        |
|                                  | (NTs)(Bntpen) | 0.00  | 0.05  | 0.05        |
|                                  | Substrate     | 0.00  | 0.00  | 0.00        |
|                                  | Total         | 2.00  | 2.00  | 2.00        |
| $^3\text{DMS\_RC}$               | Fragment      | BS1   | BS2   | BS2+Solvent |
|                                  | Fe            | 0.97  | 0.85  | 0.94        |
|                                  | (NTs)(Bntpen) | 1.03  | 1.15  | 1.06        |
|                                  | Substrate     | 0.00  | 0.00  | 0.00        |
|                                  | Total         | 2.00  | 2.00  | 2.00        |
| $^3\text{DMS\_TS}$               | Fragment      | BS1   | BS2   | BS2+Solvent |
|                                  | Fe            | 1.75  | 1.77  | 1.71        |
|                                  | (NTs)(Bntpen) | 0.19  | 0.13  | 0.11        |
|                                  | Substrate     | 0.06  | 0.09  | 0.18        |
|                                  | Total         | 2.00  | 2.00  | 2.00        |
| $^3\text{DMS\_Prd}$              | Fragment      | BS1   | BS2   | BS2+Solvent |
|                                  | Fe            | 1.98  | 1.97  | 1.97        |
|                                  | (NTs)(Bntpen) | 0.02  | 0.03  | 0.03        |
|                                  | Substrate     | 0.00  | 0.00  | 0.00        |
|                                  | Total         | 2.00  | 2.00  | 2.00        |
| $^3\text{DMS\_Prd\_Alternative}$ | Fragment      | BS1   | BS2   | BS2+Solvent |
|                                  | Fe            | 2.02  | 2.01  | 1.99        |
|                                  | (NTs)(Bntpen) | -0.02 | -0.01 | 0.01        |
|                                  | Substrate     | 0.00  | 0.00  | 0.00        |
|                                  | Total         | 2.00  | 2.00  | 2.00        |



**Table S11:** Scan Data for the pathway around CHD-TS2 calculated at UB3LYP/BS1 for  $^3[\text{Fe}^{\text{IV}}(\text{NTs})(\text{Bntpen})]^{2+}$

| NH Distance   | Abs Energy a.u. | NH Distance | Abs Energy a.u. |
|---------------|-----------------|-------------|-----------------|
| <b>2.2768</b> | -2550.163357    | 1.5868      | -2550.176742    |
| <b>2.2468</b> | -2550.163571    | 1.5568      | -2550.187398    |
| <b>2.2168</b> | -2550.163798    | 1.5268      | -2550.189256    |
| <b>2.1868</b> | -2550.164042    | 1.4968      | -2550.191536    |
| <b>2.1568</b> | -2550.164305    | 1.4668      | -2550.194308    |
| <b>2.1268</b> | -2550.164583    | 1.4368      | -2550.197595    |
| <b>2.0968</b> | -2550.164880    | 1.4068      | -2550.201368    |
| <b>2.0668</b> | -2550.165196    | 1.3768      | -2550.205520    |
| <b>2.0368</b> | -2550.165534    | 1.3468      | -2550.209956    |
| <b>2.0068</b> | -2550.165895    | 1.3168      | -2550.215145    |
| <b>1.9768</b> | -2550.166279    | 1.2868      | -2550.219789    |
| <b>1.9468</b> | -2550.166688    | 1.2568      | -2550.224391    |
| <b>1.9168</b> | -2550.167124    | 1.2268      | -2550.228862    |
| <b>1.8868</b> | -2550.167593    | 1.1968      | -2550.233110    |
| <b>1.8568</b> | -2550.168100    | 1.1668      | -2550.237028    |
| <b>1.8268</b> | -2550.168656    | 1.1368      | -2550.240499    |
| <b>1.7968</b> | -2550.169269    | 1.1068      | -2550.243379    |
| <b>1.7668</b> | -2550.169951    | 1.0768      | -2550.245508    |
| <b>1.7368</b> | -2550.170715    | 1.0468      | -2550.246696    |
| <b>1.7068</b> | -2550.171583    | 1.0168      | -2550.246719    |
| <b>1.6768</b> | -2550.172579    | 0.9868      | -2550.245312    |
| <b>1.6468</b> | -2550.173745    | 0.9568      | -2550.242157    |
| <b>1.6168</b> | -2550.175115    | 0.9268      | -2550.236878    |

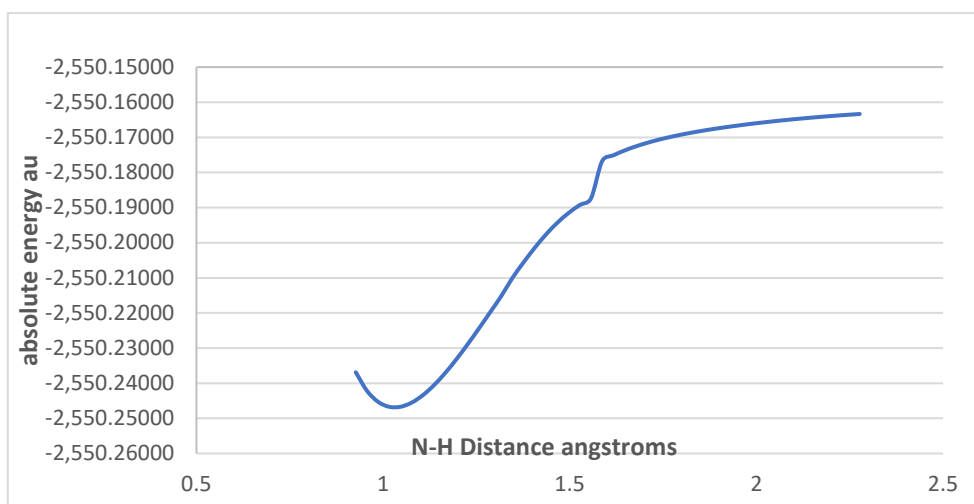

**Fig. S12.** Plot of the scan data for CHD\_TS2, calculated at UB3LYP/BS1 for  $^3[\text{Fe}^{\text{IV}}(\text{NTs})(\text{Bntpen})]^{2+}$  starting at the radical intermediate on the right-hand-side. As can be seen the second H-atom abstraction is virtually barrierless and collapses to product rapidly.

**Table S12:** Absolute energies, zero-point energies and free energies (in au) of  $^{1,3,5}[\text{Fe}^{\text{IV}}(\text{O})(\text{Bntpen})]^{2+}$  structures (UB3LYP/BS2//UB3LYP/BS1):

| System                                                    | BS1         | BS1         | BS1         | BS2         | BS2+Solvent | BS2+Solvent  |
|-----------------------------------------------------------|-------------|-------------|-------------|-------------|-------------|--------------|
|                                                           | E           | E+ZPE       | G           | E           | E           | E+ZPE        |
| $^1[\text{Fe}^{\text{IV}}(\text{O})(\text{Bntpen})]^{2+}$ | -1517.92651 | -1517.39483 | -1517.45074 | -1518.61811 | -1518.82014 | -1518.288458 |
| $^3[\text{Fe}^{\text{IV}}(\text{O})(\text{Bntpen})]^{2+}$ | -1517.96994 | -1517.43836 | -1517.49499 | -1518.66192 | -1518.86381 | -1518.332231 |
| $^5[\text{Fe}^{\text{IV}}(\text{O})(\text{Bntpen})]^{2+}$ | -1517.95804 | -1517.42866 | -1517.48807 | -1518.65803 | -1518.85929 | -1518.329914 |

**Table S13:** Relative (free) energies (in kcal mol<sup>-1</sup>) of  $^{1,3,5}[\text{Fe}^{\text{IV}}(\text{O})(\text{Bntpen})]^{2+}$  structures as calculated at UB3LYP/BS2//UB3LYP/BS1 in Gaussian:

| System                                                    | BS1   | BS1   | BS1   | BS2   | BS2+Solvent | BS2+Solvent |
|-----------------------------------------------------------|-------|-------|-------|-------|-------------|-------------|
|                                                           | E     | E+ZPE | G     | E     | E           | E+ZPE       |
| $^1[\text{Fe}^{\text{IV}}(\text{O})(\text{Bntpen})]^{2+}$ | 27.26 | 27.32 | 27.77 | 27.49 | 27.41       | 27.47       |
| $^3[\text{Fe}^{\text{IV}}(\text{O})(\text{Bntpen})]^{2+}$ | 0.00  | 0.00  | 0.00  | 0.00  | 0.00        | 0.00        |
| $^5[\text{Fe}^{\text{IV}}(\text{O})(\text{Bntpen})]^{2+}$ | 7.47  | 6.09  | 4.34  | 2.44  | 2.84        | 1.45        |

**Table S14:** Absolute energies, zero-point energies and free energies (in au) for the reaction of  $^3[\text{Fe}^{\text{IV}}(\text{O})(\text{Bntpen})]^{2+}$  with CHD and DMS as calculated at UB3LYP/BS2//UB3LYP/BS1:

| System                                                    | BS1          | BS1          | BS1          | BS2           | BS2+Solvent   | BS2+Solvent  |
|-----------------------------------------------------------|--------------|--------------|--------------|---------------|---------------|--------------|
|                                                           | E            | E+ZPE        | G            | E             | E             | E+ZPE        |
| $^3[\text{Fe}^{\text{IV}}(\text{O})(\text{Bntpen})]^{2+}$ | -1517.969940 | -1517.438360 | -1517.494990 | -1518.66192   | -1518.86381   | -1518.332231 |
| $^3\text{CHD\_RC}$                                        | -1751.344524 | -1750.688419 | -1750.757365 | -1752.13930   | -1752.33665   | -1751.680545 |
| $^3\text{CHD\_TS1}$                                       | -1751.337924 | -1750.687008 | -1750.754127 | -1752.12724   | -1752.31879   | -1751.667877 |
| $^3\text{CHD\_IR1}$                                       | -1751.371465 | -1750.717895 | -1750.786324 | -1752.16675   | -1752.36175   | -1751.708185 |
| $^3\text{CHD\_Prd}$                                       | -1751.438452 | -1750.784925 | -1750.858622 | -1752.23069   | -1752.42205   | -1751.768526 |
| $^5\text{CHD\_Prd}$                                       | -2550.262082 | -2549.482744 | -2549.573178 | -2551.384769  | -2551.558106  | -2550.778768 |
| $^3\text{DMS\_RC}$                                        | -1995.948892 | -1995.340033 | -1995.409585 | -1996.72676   | -1996.92313   | -1996.314270 |
| $^3\text{DMS\_TS}$                                        | -1995.928610 | -1995.322651 | -1995.390831 | -1996.71474   | -1996.90530   | -1996.299345 |
| $^3\text{DMS\_Prd}$                                       | -1995.939938 | -1995.33289  | -1995.401201 | -1996.73899   | -1996.93043   | -1996.323378 |
| $^3\text{CHD\_TS1\_Deuterium1}$                           | -1751.337924 | -1750.68914  | -1750.756328 | -1752.12724   | -1752.31879   | -1751.670009 |
| $^3\text{CHD\_TS1\_Deuterium2}$                           | -1751.337924 | -1750.690333 | -1750.757531 | -1752.12724   | -1752.31879   | -1751.671202 |
| Isolated CHD Deuterium 1                                  | -233.3654783 | -233.2450530 | -233.2734320 | -233.4714593  | -233.4737984  | -233.353373  |
| Isolated CHD Deuterium 2                                  | -233.3654783 | -233.2451330 | -233.2735070 | -233.4714593  | -233.4737984  | -233.353453  |
| $^5\text{DMS\_Prd}$                                       | -1995.961117 | -1995.320563 | -1995.426797 | -1996.7645093 | -1996.9548948 | -1996.31434  |

**Table S15:** Relative (free) energies (in kcal mol<sup>-1</sup>) intermediates and transition states along the reaction of <sup>3</sup>[Fe<sup>IV</sup>(O)(Bntpen)]<sup>2+</sup> with CHD and DMS as calculated at UB3LYP/BS2//UB3LYP/BS1:

| System                          | BS1    | BS1    | BS1    | BS2    | BS2+Solvent | BS2+Solvent |
|---------------------------------|--------|--------|--------|--------|-------------|-------------|
|                                 | E      | E+ZPE  | G      | E      | E           | E+ZPE       |
| <sup>3</sup> CHD_RC             | -5.71  | -5.20  | 4.80   | -3.72  | 0.60        | 1.12        |
| <sup>3</sup> CHD_TS1            | -1.57  | -4.31  | 6.83   | 3.85   | 11.81       | 9.07        |
| <sup>3</sup> CHD_IR1            | -22.62 | -23.70 | -13.37 | -20.94 | -15.15      | -16.23      |
| <sup>3</sup> CHD_Prd            | -64.65 | -65.76 | -58.74 | -61.06 | -52.99      | -54.09      |
| <sup>5</sup> CHD_Prd            | -81.2  | -83.0  | -76.5  | -78.6  | -63.3       | -65.0       |
| <sup>3</sup> DMS_RC             | -6.67  | -6.21  | 2.85   | -5.63  | 0.30        | 0.76        |
| <sup>3</sup> DMS_TS             | 6.06   | 4.69   | 14.62  | 1.91   | 11.49       | 10.12       |
| <sup>3</sup> DMS_Prd            | -1.05  | -1.73  | 8.11   | -13.30 | -4.28       | -4.96       |
| <sup>3</sup> CHD_TS1_Deuterium1 | -1.57  | -3.59  | 7.59   | 3.85   | 11.81       | 9.79        |
| <sup>3</sup> CHD_TS1_Deuterium2 | -1.57  | -4.29  | 6.88   | 3.85   | 11.81       | 9.09        |
| <sup>5</sup> DMS_Prd            | -14.34 | 6.01   | -7.95  | -29.32 | -19.63      | 0.71        |

**Table S16:** Kinetic Isotope Effects for the CHD Reactions with <sup>3</sup>[Fe<sup>IV</sup>(O)(Bntpen)]<sup>2+</sup> as calculated at UB3LYP/BS1 for Fe=O---H<sup>1</sup>-CH<sup>2</sup>R:

| Kinetic Isotope Effects               | i Frequency | KIE Eyring | KIE Wigner |
|---------------------------------------|-------------|------------|------------|
| CHD_TS1_H <sup>1</sup> H <sup>2</sup> | -492.5543   |            |            |
| CHD_TS1_D <sup>1</sup> H <sup>2</sup> | -432.9967   | 3.59       | 3.75       |
| CHD_TS1_H <sup>1</sup> D <sup>2</sup> | -472.2792   | 1.09       | 1.10       |

**Table S17:** Spin densities of key fragments of intermediates and transition states for the reaction of  $^3[\text{Fe}^{\text{IV}}(\text{O})(\text{Bntpen})]^{2+}$  as calculated at the UB3LYP/BS1//BS2//BS2+Solvent levels of theory:

|                                       |                 |            |            |                    |
|---------------------------------------|-----------------|------------|------------|--------------------|
| <b><math>^3\text{CHD\_RC}</math></b>  | <b>Fragment</b> | <b>BS1</b> | <b>BS2</b> | <b>BS2+Solvent</b> |
|                                       | Fe              | 1.10       | 1.21       | 1.26               |
|                                       | O               | 0.96       | 0.91       | 0.87               |
|                                       | Bntpen          | -0.07      | -0.12      | -0.13              |
|                                       | Substrate       | 0.00       | 0.00       | 0.00               |
|                                       | Total           | 2.00       | 2.00       | 2.00               |
| <b><math>^3\text{CHD\_TS1}</math></b> | <b>Fragment</b> | <b>BS1</b> | <b>BS2</b> | <b>BS2+Solvent</b> |
|                                       | Fe              | 0.84       | 0.82       | 0.91               |
|                                       | O               | 0.70       | 0.69       | 0.74               |
|                                       | Bntpen          | -0.04      | 0.00       | -0.02              |
|                                       | Substrate       | 0.50       | 0.48       | 0.37               |
|                                       | Total           | 2.00       | 2.00       | 2.00               |
| <b><math>^3\text{CHD\_IR1}</math></b> |                 | <b>BS1</b> | <b>BS2</b> | <b>BS2+Solvent</b> |
|                                       | Fe              | 0.92       | 0.91       | 0.93               |
|                                       | O               | 0.16       | 0.14       | 0.13               |
|                                       | Bntpen          | -0.06      | -0.04      | -0.06              |
|                                       | Substrate       | 0.98       | 1.00       | 1.00               |
|                                       | Total           | 2.00       | 2.00       | 2.00               |
| <b><math>^3\text{CHD\_Prd}</math></b> | <b>Fragment</b> | <b>BS1</b> | <b>BS2</b> | <b>BS2+Solvent</b> |
|                                       | Fe              | 1.98       | 1.98       | 1.98               |
|                                       | O               | 0.02       | 0.02       | 0.02               |
|                                       | Bntpen          | 0.00       | 0.00       | 0.00               |
|                                       | Substrate       | 0.00       | 0.00       | 0.00               |
|                                       | Total           | 2.00       | 2.00       | 2.00               |
| <b><math>^3\text{DMS\_RC}</math></b>  | <b>Fragment</b> | <b>BS1</b> | <b>BS2</b> | <b>BS2+Solvent</b> |
|                                       | Fe              | 1.10       | 1.10       | 1.20               |
|                                       | O               | 0.96       | 0.96       | 0.90               |
|                                       | Bntpen          | -0.06      | -0.06      | -0.12              |
|                                       | Substrate       | 0.01       | 0.01       | 0.01               |
|                                       | Total           | 2.00       | 2.00       | 2.00               |
| <b><math>^3\text{DMS\_TS}</math></b>  | <b>Fragment</b> | <b>BS1</b> | <b>BS2</b> | <b>BS2+Solvent</b> |
|                                       | Fe              | 2.32       | 2.42       | 2.42               |
|                                       | O               | 0.00       | 0.01       | 0.02               |
|                                       | Bntpen          | 0.03       | 0.02       | 0.01               |
|                                       | Substrate       | -0.35      | -0.45      | -0.45              |
|                                       | Total           | 2.00       | 2.00       | 2.00               |
| <b><math>^3\text{DMS\_Prd}</math></b> | <b>Fragment</b> | <b>BS1</b> | <b>BS2</b> | <b>BS2+Solvent</b> |
|                                       | Fe              | 1.96       | 1.96       | 1.96               |
|                                       | O               | 0.04       | 0.04       | 0.04               |
|                                       | Bntpen          | 0.00       | -0.01      | -0.01              |
|                                       | Substrate       | 0.00       | 0.00       | 0.00               |
|                                       | Total           | 2.00       | 2.00       | 2.00               |

**Table S18:** Absolute energies, zero-point energies and free energies (in au) of  $^3[\text{Fe}^{\text{IV}}(\text{NTs})(\text{N4Py})]^{2+}$  complexes and their reactivity with CHD and DMS as calculated at UB3LYP/BS2//UB3LYP/BS1:

| System                                                                       | BS1         | BS1         | BS1         | BS2         | BS2+Solvent | BS2+Solvent |
|------------------------------------------------------------------------------|-------------|-------------|-------------|-------------|-------------|-------------|
|                                                                              | E           | E+ZPE       | G           | E           | E           | E+ZPE       |
| $^3[\text{Fe}^{\text{IV}}(\text{NTs})(\text{N4Py})]^{2+}$                    | -2159.57202 | -2159.03031 | -2159.09761 | -2160.52518 | -2160.72396 | -2160.18224 |
| $^3\text{CHD\_TS1 } ^3[\text{Fe}^{\text{IV}}(\text{NTs})(\text{N4Py})]^{2+}$ | -2392.93046 | -2392.26860 | -2392.34226 | -2393.97862 | -2394.16996 | -2393.50810 |
| $^3\text{DMS\_TS1 } ^3[\text{Fe}^{\text{IV}}(\text{NTs})(\text{N4Py})]^{2+}$ | -2637.51989 | -2636.90181 | -2636.97578 | -2638.55474 | -2638.74557 | -2638.12748 |

**Table S19:** Relative (free) energies (in kcal mol<sup>-1</sup>) of the transition states for the reaction of  $^3[\text{Fe}^{\text{IV}}(\text{NTs})(\text{N4Py})]^{2+}$  with CHD and DMS as calculated at UB3LYP/BS2//UB3LYP/BS1:

| System                                                                       | BS1  | BS1   | BS1  | BS2  | BS2+Solvent | BS2+Solvent |
|------------------------------------------------------------------------------|------|-------|------|------|-------------|-------------|
|                                                                              | E    | E+ZPE | G    | E    | E           | E+ZPE       |
| $^3\text{CHD\_TS1 } ^3[\text{Fe}^{\text{IV}}(\text{NTs})(\text{N4Py})]^{2+}$ | 4.4  | 2.2   | 15.9 | 11.3 | 17.4        | 15.2        |
| $^3\text{DMS\_TS1 } ^3[\text{Fe}^{\text{IV}}(\text{NTs})(\text{N4Py})]^{2+}$ | 12.8 | 12.7  | 25.7 | 16.5 | 24.0        | 23.8        |

**Table S20:** Absolute energies, zero-point energies and free energies (in au) of intermediates and transition states for the reaction of  $^3[\text{Fe}^{\text{IV}}(\text{O})(\text{N4Py})]^{2+}$  with CHD and DMS as calculated at UB3LYP/BS2//UB3LYP/BS1:

| System                                                                     | BS1          | BS1          | BS1          | BS2          | BS2+Solvent  | BS2+Solvent  |
|----------------------------------------------------------------------------|--------------|--------------|--------------|--------------|--------------|--------------|
|                                                                            | E            | E+ZPE        | G            | E            | E            | E+ZPE        |
| $^3[\text{Fe}^{\text{IV}}(\text{O})(\text{N4Py})]^{2+}$                    | -1360.774898 | -1360.360408 | -1360.411359 | -1361.399098 | -1361.604473 | -1361.189983 |
| $^3\text{CHD\_TS1 } ^3[\text{Fe}^{\text{IV}}(\text{O})(\text{N4Py})]^{2+}$ | -1594.141754 | -1593.608439 | -1593.670150 | -1594.862335 | -1595.055600 | -1594.522285 |
| $^3\text{DMS\_TS1 } ^3[\text{Fe}^{\text{IV}}(\text{O})(\text{N4Py})]^{2+}$ | -1838.726976 | -1838.237678 | -1838.299254 | -1839.438430 | -1839.629284 | -1839.139986 |

**Table S21:** Relative (free) energies (in kcal mol<sup>-1</sup>) for transition state for the reaction of  $^3[\text{Fe}^{\text{IV}}(\text{O})(\text{N4Py})]^{2+}$  with CHD and DMS as calculated at UB3LYP/BS2//UB3LYP/BS1:

| System                                                                     | BS1   | BS1   | BS1   | BS2   | BS2+Solvent | BS2+Solvent |
|----------------------------------------------------------------------------|-------|-------|-------|-------|-------------|-------------|
|                                                                            | E     | E+ZPE | G     | E     | E           | E+ZPE       |
| $^3\text{CHD\_TS1 } ^3[\text{Fe}^{\text{IV}}(\text{O})(\text{N4Py})]^{2+}$ | -0.86 | -3.93 | 7.05  | 5.16  | 14.23       | 11.16       |
| $^3\text{DMS\_TS1 } ^3[\text{Fe}^{\text{IV}}(\text{O})(\text{N4Py})]^{2+}$ | 10.20 | 9.10  | 19.60 | 10.38 | 21.95       | 20.86       |

**Table S22:** Electron Affinities of Isolated compounds  $^3[\text{Fe}^{\text{IV}}(\text{NTs})(\text{Bntpen})]^{2+}$ ,  $^3[\text{Fe}^{\text{IV}}(\text{O})(\text{Bntpen})]^{2+}$ ,  $^3[\text{Fe}^{\text{IV}}(\text{O})(\text{N4Py})]^{2+}$  and  $^3[\text{Fe}^{\text{IV}}(\text{NTs})(\text{N4Py})]^{2+}$  in kcal mol<sup>-1</sup>

| System                                                      | BS1   | BS1   | BS1   | BS2   | BS2+Solvent | BS2+Solvent |
|-------------------------------------------------------------|-------|-------|-------|-------|-------------|-------------|
|                                                             | E     | E+ZPE | G     | E     | E           | E+ZPE       |
| $^3[\text{Fe}^{\text{IV}}(\text{NTs})(\text{Bntpen})]^{2+}$ | 193.3 | 193.8 | 193.8 | 193.5 | 118.2       | 118.8       |
| $^3[\text{Fe}^{\text{IV}}(\text{NTs})(\text{N4Py})]^{2+}$   | 187.1 | 189.7 | 192.2 | 193.4 | 116.0       | 118.6       |
| $^3[\text{Fe}^{\text{IV}}(\text{O})(\text{Bntpen})]^{2+}$   | 174.1 | 176.0 | 176.4 | 176.3 | 93.3        | 95.2        |
| $^3[\text{Fe}^{\text{IV}}(\text{O})(\text{N4Py})]^{2+}$     | 165.7 | 167.4 | 168.4 | 171.3 | 87.0        | 88.7        |

**Table S23:** BDE<sub>NH</sub> and BDE<sub>OH</sub> energies of Isolated compounds  $^{2,4}[\text{Fe}^{\text{III}}(\text{NTs-H})(\text{Bntpen})]^{2+}$ ,  $^{2,4}[\text{Fe}^{\text{III}}(\text{OH})(\text{Bntpen})]^{2+}$ ,  $^{2,4}[\text{Fe}^{\text{III}}(\text{OH})(\text{N4Py})]^{2+}$  and  $^{2,4}[\text{Fe}^{\text{III}}(\text{NTs-H})(\text{N4Py})]^{2+}$  in kcal mol<sup>-1</sup>

| System                                                         | BS1  | BS1   | BS1  | BS2  | BS2+Solvent | BS2+Solvent |
|----------------------------------------------------------------|------|-------|------|------|-------------|-------------|
|                                                                | E    | E+ZPE | G    | E    | E           | E+ZPE       |
| $^4[\text{Fe}^{\text{III}}(\text{NTs-H})(\text{Bntpen})]^{2+}$ | 86.3 | 80.0  | 75.2 | 91.3 | 92.0        | 85.6        |
| $^2[\text{Fe}^{\text{III}}(\text{NTs-H})(\text{Bntpen})]^{2+}$ | 92.5 | 84.5  | 77.8 | 94.3 | 96.7        | 88.8        |
| $^4[\text{Fe}^{\text{III}}(\text{O-H})(\text{Bntpen})]^{2+}$   | 85.2 | 79.7  | 74.7 | 88.7 | 87.6        | 82.0        |
| $^2[\text{Fe}^{\text{III}}(\text{O-H})(\text{Bntpen})]^{2+}$   | 86.9 | 80.3  | 73.7 | 86.9 | 87.5        | 80.8        |
| $^4[\text{Fe}^{\text{III}}(\text{NTs-H})(\text{N4Py})]^{2+}$   | 81.3 | 75.3  | 70.3 | 86.0 | 85.0        | 79.0        |
| $^2[\text{Fe}^{\text{III}}(\text{NTs-H})(\text{N4Py})]^{2+}$   | 95.1 | 87.3  | 80.4 | 96.4 | 98.4        | 90.7        |
| $^4[\text{Fe}^{\text{III}}(\text{O-H})(\text{N4Py})]^{2+}$     | 77.2 | 72.3  | 66.9 | 78.8 | 75.4        | 70.4        |
| $^2[\text{Fe}^{\text{III}}(\text{O-H})(\text{N4Py})]^{2+}$     | 90.5 | 83.9  | 77.2 | 90.6 | 89.7        | 83.1        |

## References:

1. a) Y. Zang and L. Que Jr, *Inorg. Chem.* 1995, **34**, 1030; b) Y. Zang, J. Kim, Y. Dong, E. C. Wilkinson, E. H. Appelman and L. Que Jr, *J. Am. Chem. Soc.* 1997, **119**, 4197; c) S. Hong, Y.-Min Lee, W. Shin, S. Fukuzumi and W. Nam, *J. Am. Chem. Soc.* 2009, **131**, 13910.
2. a) E. J. Klinker, J. Kaizer, W. W. Brennessel, N. L. Woodrum, C. J. Cramer and L. Que Jr, *Angew. Chem. Int. Ed.*, 2005, **44**, 3690; b) G. Mukherjee, C. W. Z. Lee, S. S. Nag, A. Alili, F. G. Cantú Reinhard, D. Kumar, C. V. Sastri and S. P. de Visser, *Dalton Trans.*, 2018, **47**, 14945; c) S. Banerjee, W. Rasheed, R. Fan, A. Draksharapu, W. N. Oloo, Y. Guo and L. Que Jr., *Chem. Eur. J.*, 2019, **25**, 9608; d) G. Sabenya, I. Gamba, L. Gómez, M. Clémancey, J. R. Frisch, E. J. Klinker, G. Blondin, S. Torelli, L. Que Jr, V. Martin-Diaconescu, J.-M. Latour, J. Lloret-Fillol and M. Costas, *Chem. Sci.* 2019, **10**, 9513.
3. E. J. Klinker, T. A. Jackson, M. P. Jensen, A. Stubna, G. Juhász, E. L. Bominaar, E. Münck and L. Que Jr, *Angew. Chem. Int. Ed.*, 2006, **45**, 7394.
4. Y. Yamada, T. Yamamoto and M. Okawara, *Chem. Lett.* 1975, pp. 361-362.
5. H. C. Brown and Y. Okamoto, *J. Am. Chem. Soc.*, 1958, **80**, 4979.



## Cartesian coordinates:

### <sup>1</sup>[Fe<sup>IV</sup>(NTs)(Bntpen)]<sup>2+</sup> Conformer 4a:

|    |              |              |              |
|----|--------------|--------------|--------------|
| Fe | -0.751885000 | 0.270135000  | -3.657851000 |
| N  | 0.257452000  | 1.993968000  | -4.013761000 |
| N  | -1.561533000 | 0.982020000  | -1.926011000 |
| N  | -2.244501000 | 1.527444000  | -4.449667000 |
| N  | -2.129900000 | -1.254593000 | -3.967217000 |
| N  | -0.049254000 | -0.560563000 | -5.478455000 |
| C  | 1.365744000  | 2.448262000  | -3.375944000 |
| H  | 1.679199000  | 1.908173000  | -2.488576000 |
| C  | 2.045093000  | 3.584393000  | -3.825621000 |
| H  | 2.924704000  | 3.922047000  | -3.291779000 |
| C  | 1.571838000  | 4.270120000  | -4.947197000 |
| H  | 2.084498000  | 5.152171000  | -5.313408000 |
| C  | 0.400588000  | 3.822119000  | -5.576053000 |
| H  | -0.016824000 | 4.360667000  | -6.419337000 |
| C  | -0.242012000 | 2.686222000  | -5.089129000 |
| C  | -1.561788000 | 2.168151000  | -5.622283000 |
| H  | -2.165344000 | 2.984996000  | -6.039181000 |
| H  | -1.425289000 | 1.416920000  | -6.404202000 |
| C  | -2.582955000 | 2.593093000  | -3.435674000 |
| H  | -3.610238000 | 2.943853000  | -3.590678000 |
| H  | -1.930059000 | 3.455480000  | -3.594120000 |
| C  | -2.389904000 | 2.061571000  | -2.049739000 |
| C  | -3.011063000 | 2.648576000  | -0.947547000 |
| H  | -3.667680000 | 3.499171000  | -1.092030000 |
| C  | -2.780787000 | 2.129770000  | 0.330140000  |
| H  | -3.246678000 | 2.578876000  | 1.199483000  |
| C  | -1.956867000 | 1.009787000  | 0.454386000  |
| H  | -1.762816000 | 0.554876000  | 1.417514000  |
| C  | -1.374478000 | 0.454070000  | -0.683948000 |
| H  | -0.780320000 | -0.444336000 | -0.601535000 |
| C  | -3.467689000 | 0.703832000  | -4.759386000 |
| H  | -4.019374000 | 1.129091000  | -5.607451000 |
| H  | -4.120546000 | 0.762979000  | -3.884592000 |
| C  | -3.084056000 | -0.737461000 | -5.031676000 |
| H  | -3.971430000 | -1.378410000 | -5.065683000 |
| H  | -2.582761000 | -0.820323000 | -5.997260000 |
| C  | -1.343338000 | -2.395841000 | -4.558676000 |
| H  | -2.020484000 | -3.157118000 | -4.959340000 |
| H  | -0.760436000 | -2.843347000 | -3.748269000 |
| C  | -0.416836000 | -1.867501000 | -5.611709000 |
| C  | 0.084213000  | -2.666129000 | -6.641942000 |
| H  | -0.246155000 | -3.694392000 | -6.732641000 |
| C  | 1.013611000  | -2.130076000 | -7.537417000 |
| H  | 1.417407000  | -2.736557000 | -8.339747000 |
| C  | 1.415242000  | -0.799357000 | -7.376481000 |
| H  | 2.140792000  | -0.347457000 | -8.041433000 |
| C  | 0.867460000  | -0.047086000 | -6.340107000 |
| H  | 1.167077000  | 0.978442000  | -6.185981000 |
| C  | -2.858387000 | -1.720785000 | -2.691549000 |
| H  | -3.383471000 | -0.846664000 | -2.304593000 |
| H  | -2.061920000 | -1.978912000 | -1.989670000 |
| C  | -3.815309000 | -2.878597000 | -2.871548000 |
| C  | -5.177555000 | -2.649445000 | -3.145954000 |
| H  | -5.554746000 | -1.631385000 | -3.212205000 |
| C  | -6.067382000 | -3.719078000 | -3.289850000 |
| H  | -7.115592000 | -3.527932000 | -3.491853000 |
| C  | -5.607841000 | -5.034258000 | -3.151092000 |
| H  | -6.298207000 | -5.864042000 | -3.253888000 |
| C  | -4.260582000 | -5.275246000 | -2.854385000 |
| H  | -3.908480000 | -6.291787000 | -2.717372000 |
| C  | -3.371372000 | -4.205313000 | -2.712040000 |
| H  | -2.336622000 | -4.402432000 | -2.444557000 |
| N  | 0.489512000  | -0.793673000 | -3.118786000 |

|   |             |              |              |
|---|-------------|--------------|--------------|
| O | 1.820429000 | 0.655135000  | -0.833300000 |
| S | 1.552535000 | -0.795373000 | -1.560560000 |
| O | 0.572139000 | -1.929469000 | -0.833795000 |
| C | 3.175551000 | -1.546418000 | -2.033756000 |
| C | 3.193891000 | -2.868582000 | -2.477176000 |
| C | 4.323649000 | -0.774464000 | -1.861939000 |
| H | 4.260475000 | 0.234635000  | -1.472389000 |
| H | 2.281935000 | -3.447684000 | -2.556208000 |
| C | 4.435123000 | -3.432117000 | -2.777617000 |
| H | 4.481669000 | -4.462027000 | -3.115373000 |
| C | 5.629048000 | -2.696004000 | -2.627608000 |
| C | 5.551475000 | -1.365542000 | -2.168866000 |
| C | 6.965495000 | -3.334116000 | -2.912261000 |
| H | 6.462535000 | -0.792329000 | -2.034329000 |
| H | 7.708988000 | -2.593609000 | -3.220445000 |
| H | 7.353794000 | -3.829898000 | -2.012506000 |
| H | 6.891879000 | -4.095055000 | -3.694651000 |

**<sup>1</sup>[Fe<sup>IV</sup>(NTs)(Bntpen)]<sup>2+</sup> Conformer 4b**

|    |              |              |              |
|----|--------------|--------------|--------------|
| Fe | -0.703051000 | 0.505373000  | -3.505780000 |
| N  | -1.521298000 | -0.951092000 | -4.604040000 |
| N  | 0.500308000  | 1.123766000  | -5.042306000 |
| N  | -2.118501000 | 1.587094000  | -4.693638000 |
| N  | -0.646430000 | 2.270884000  | -2.390621000 |
| N  | -1.866583000 | -0.039564000 | -1.889559000 |
| C  | -0.938858000 | -2.131780000 | -4.932937000 |
| H  | 0.091729000  | -2.278150000 | -4.627153000 |
| C  | -1.647900000 | -3.120576000 | -5.621440000 |
| H  | -1.154633000 | -4.054692000 | -5.858918000 |
| C  | -2.975244000 | -2.887086000 | -5.985517000 |
| H  | -3.543653000 | -3.640996000 | -6.517866000 |
| C  | -3.561160000 | -1.650490000 | -5.673833000 |
| H  | -4.578318000 | -1.427046000 | -5.975016000 |
| C  | -2.815981000 | -0.697847000 | -4.984828000 |
| C  | -3.318727000 | 0.689346000  | -4.654279000 |
| H  | -4.089282000 | 1.010916000  | -5.367210000 |
| H  | -3.751676000 | 0.734841000  | -3.650632000 |
| C  | -1.602922000 | 1.696623000  | -6.105539000 |
| H  | -2.020394000 | 2.584094000  | -6.595292000 |
| H  | -1.952175000 | 0.829018000  | -6.674023000 |
| C  | -0.102219000 | 1.707042000  | -6.114919000 |
| C  | 0.637665000  | 2.199255000  | -7.192031000 |
| H  | 0.129372000  | 2.670248000  | -8.025778000 |
| C  | 2.029199000  | 2.060335000  | -7.187252000 |
| H  | 2.620512000  | 2.431221000  | -8.016399000 |
| C  | 2.640107000  | 1.426363000  | -6.100244000 |
| H  | 3.712690000  | 1.281777000  | -6.065679000 |
| C  | 1.851907000  | 0.972938000  | -5.044618000 |
| H  | 2.270965000  | 0.469558000  | -4.185304000 |
| C  | -2.312076000 | 2.962037000  | -4.112018000 |
| H  | -3.337722000 | 3.315152000  | -4.279269000 |
| H  | -1.645166000 | 3.637571000  | -4.653569000 |
| C  | -1.973892000 | 2.967052000  | -2.633997000 |
| H  | -1.925952000 | 3.990510000  | -2.246875000 |
| H  | -2.737871000 | 2.433804000  | -2.065766000 |
| C  | -0.605904000 | 1.811194000  | -0.957595000 |
| H  | -0.797754000 | 2.647002000  | -0.277099000 |
| H  | 0.408112000  | 1.444168000  | -0.763299000 |
| C  | -1.607587000 | 0.707472000  | -0.773750000 |
| C  | -2.225048000 | 0.440312000  | 0.447048000  |
| H  | -2.009214000 | 1.064086000  | 1.306775000  |
| C  | -3.120562000 | -0.631334000 | 0.542492000  |
| H  | -3.611434000 | -0.854743000 | 1.482630000  |
| C  | -3.366120000 | -1.407089000 | -0.592414000 |
| H  | -4.035911000 | -2.256921000 | -0.558585000 |
| C  | -2.717583000 | -1.092753000 | -1.785635000 |

|   |              |              |              |
|---|--------------|--------------|--------------|
| H | -2.859580000 | -1.700630000 | -2.663312000 |
| C | 0.556945000  | 3.174162000  | -2.706929000 |
| H | 0.481871000  | 3.423455000  | -3.766097000 |
| H | 1.432640000  | 2.534646000  | -2.575327000 |
| C | 0.664465000  | 4.431354000  | -1.871993000 |
| C | 0.115808000  | 5.644009000  | -2.332170000 |
| H | -0.373010000 | 5.684983000  | -3.302882000 |
| C | 0.227281000  | 6.813447000  | -1.572811000 |
| H | -0.192569000 | 7.741959000  | -1.943699000 |
| C | 0.897548000  | 6.787709000  | -0.344028000 |
| H | 0.991071000  | 7.694827000  | 0.242523000  |
| C | 1.466763000  | 5.593499000  | 0.115628000  |
| H | 2.009199000  | 5.577547000  | 1.054591000  |
| C | 1.354419000  | 4.425067000  | -0.644396000 |
| H | 1.829794000  | 3.512871000  | -0.293108000 |
| N | 0.667538000  | -0.142170000 | -2.758439000 |
| O | -0.439073000 | -2.757150000 | -1.593068000 |
| S | 0.897101000  | -1.903202000 | -1.999201000 |
| O | 1.738883000  | -2.305779000 | -3.377758000 |
| C | 2.045963000  | -1.792528000 | -0.548195000 |
| C | 3.371293000  | -1.424502000 | -0.777346000 |
| C | 1.543664000  | -2.130591000 | 0.707715000  |
| H | 0.515989000  | -2.453540000 | 0.826169000  |
| H | 3.730743000  | -1.212226000 | -1.777138000 |
| C | 4.229119000  | -1.383961000 | 0.324177000  |
| H | 5.268833000  | -1.112336000 | 0.175524000  |
| C | 3.775364000  | -1.712348000 | 1.618317000  |
| C | 2.425739000  | -2.082405000 | 1.789874000  |
| C | 4.725748000  | -1.708838000 | 2.789533000  |
| H | 2.067266000  | -2.353340000 | 2.777339000  |
| H | 5.531212000  | -0.981330000 | 2.654192000  |
| H | 4.210526000  | -1.482273000 | 3.727415000  |
| H | 5.194704000  | -2.694942000 | 2.906516000  |

**<sup>3</sup>[Fe<sup>IV</sup>(NTs)(Bntpen)]<sup>2+</sup> Conformer 4a**

|    |              |              |              |
|----|--------------|--------------|--------------|
| Fe | -0.750858000 | 0.448537000  | -3.597837000 |
| N  | 0.159833000  | 2.217135000  | -3.978231000 |
| N  | -1.664346000 | 1.106338000  | -1.905713000 |
| N  | -2.298240000 | 1.555888000  | -4.453353000 |
| N  | -1.993764000 | -1.201600000 | -3.925753000 |
| N  | 0.136709000  | -0.364485000 | -5.307697000 |
| C  | 1.239807000  | 2.742224000  | -3.346234000 |
| H  | 1.619871000  | 2.204971000  | -2.483149000 |
| C  | 1.835643000  | 3.925988000  | -3.794636000 |
| H  | 2.695424000  | 4.317032000  | -3.264873000 |
| C  | 1.309754000  | 4.584192000  | -4.908436000 |
| H  | 1.756225000  | 5.503208000  | -5.270452000 |
| C  | 0.175623000  | 4.052804000  | -5.541027000 |
| H  | -0.275833000 | 4.558521000  | -6.387118000 |
| C  | -0.381305000 | 2.872197000  | -5.057232000 |
| C  | -1.638162000 | 2.242213000  | -5.613836000 |
| H  | -2.299237000 | 2.996962000  | -6.058762000 |
| H  | -1.416620000 | 1.494196000  | -6.380264000 |
| C  | -2.774921000 | 2.594412000  | -3.464363000 |
| H  | -3.815750000 | 2.864121000  | -3.677873000 |
| H  | -2.178132000 | 3.501538000  | -3.593984000 |
| C  | -2.605483000 | 2.081944000  | -2.067681000 |
| C  | -3.324630000 | 2.602249000  | -0.991519000 |
| H  | -4.070999000 | 3.369593000  | -1.163473000 |
| C  | -3.065635000 | 2.130111000  | 0.299193000  |
| H  | -3.607272000 | 2.527695000  | 1.149539000  |
| C  | -2.100965000 | 1.133322000  | 0.465167000  |
| H  | -1.864680000 | 0.732035000  | 1.442729000  |
| C  | -1.426672000 | 0.635952000  | -0.649553000 |
| H  | -0.696839000 | -0.152630000 | -0.530499000 |
| C  | -3.435783000 | 0.628371000  | -4.805938000 |

|   |              |              |              |
|---|--------------|--------------|--------------|
| H | -3.981090000 | 1.005391000  | -5.680212000 |
| H | -4.128584000 | 0.637871000  | -3.960751000 |
| C | -2.923326000 | -0.777994000 | -5.048087000 |
| H | -3.755348000 | -1.486204000 | -5.126543000 |
| H | -2.363324000 | -0.825377000 | -5.984022000 |
| C | -1.080541000 | -2.279096000 | -4.441038000 |
| H | -1.659442000 | -3.105334000 | -4.866763000 |
| H | -0.517365000 | -2.662787000 | -3.584902000 |
| C | -0.129634000 | -1.695879000 | -5.444343000 |
| C | 0.488532000  | -2.469521000 | -6.429126000 |
| H | 0.238478000  | -3.520150000 | -6.520879000 |
| C | 1.426519000  | -1.878926000 | -7.280175000 |
| H | 1.917771000  | -2.464317000 | -8.048667000 |
| C | 1.719032000  | -0.520275000 | -7.119839000 |
| H | 2.445135000  | -0.023881000 | -7.751683000 |
| C | 1.059695000  | 0.203022000  | -6.128407000 |
| H | 1.273435000  | 1.249615000  | -5.977446000 |
| C | -2.755302000 | -1.699448000 | -2.685679000 |
| H | -3.361368000 | -0.861347000 | -2.339869000 |
| H | -1.983518000 | -1.887977000 | -1.935519000 |
| C | -3.621234000 | -2.922899000 | -2.894765000 |
| C | -4.984140000 | -2.786754000 | -3.222434000 |
| H | -5.425907000 | -1.796450000 | -3.307866000 |
| C | -5.793809000 | -3.913965000 | -3.397642000 |
| H | -6.843783000 | -3.793828000 | -3.640918000 |
| C | -5.252613000 | -5.195065000 | -3.238193000 |
| H | -5.880902000 | -6.069566000 | -3.365369000 |
| C | -3.904409000 | -5.344547000 | -2.889921000 |
| H | -3.489987000 | -6.335133000 | -2.737803000 |
| C | -3.095981000 | -4.216760000 | -2.715676000 |
| H | -2.061285000 | -4.344145000 | -2.408670000 |
| N | 0.514934000  | -0.470448000 | -2.748176000 |
| O | 2.365180000  | 0.970204000  | -1.134141000 |
| S | 1.784190000  | -0.540873000 | -1.387104000 |
| O | 0.976289000  | -1.319256000 | -0.190178000 |
| C | 3.139722000  | -1.633363000 | -2.031638000 |
| C | 3.023782000  | -3.006562000 | -1.825348000 |
| C | 4.244025000  | -1.028853000 | -2.628222000 |
| H | 4.312423000  | 0.048955000  | -2.717142000 |
| H | 2.168931000  | -3.424725000 | -1.306643000 |
| C | 4.076381000  | -3.813826000 | -2.263968000 |
| H | 4.022892000  | -4.885543000 | -2.104306000 |
| C | 5.216011000  | -3.259413000 | -2.881634000 |
| C | 5.280507000  | -1.861835000 | -3.056605000 |
| C | 6.365824000  | -4.139649000 | -3.304384000 |
| H | 6.160682000  | -1.420157000 | -3.511780000 |
| H | 6.029463000  | -5.147624000 | -3.563479000 |
| H | 6.899782000  | -3.722330000 | -4.163033000 |
| H | 7.092810000  | -4.239747000 | -2.487487000 |

**$^3[\text{Fe}^{\text{IV}}(\text{NTs})(\text{Bntpen})]^{2+}$  Conformer 4b**

|    |              |              |              |
|----|--------------|--------------|--------------|
| Fe | -0.759337000 | 0.587683000  | -3.443060000 |
| N  | -1.528250000 | -0.925041000 | -4.564192000 |
| N  | 0.506299000  | 1.088033000  | -4.936696000 |
| N  | -2.111950000 | 1.610229000  | -4.705901000 |
| N  | -0.765013000 | 2.366270000  | -2.361803000 |
| N  | -1.948698000 | 0.051925000  | -1.850810000 |
| C  | -0.935352000 | -2.105488000 | -4.872280000 |
| H  | 0.098894000  | -2.239997000 | -4.575784000 |
| C  | -1.632021000 | -3.106874000 | -5.555917000 |
| H  | -1.130057000 | -4.040052000 | -5.778225000 |
| C  | -2.956763000 | -2.886188000 | -5.936490000 |
| H  | -3.515950000 | -3.651455000 | -6.462350000 |
| C  | -3.550477000 | -1.645776000 | -5.655353000 |
| H  | -4.563045000 | -1.429657000 | -5.976730000 |
| C  | -2.816422000 | -0.680756000 | -4.972300000 |

|   |              |              |              |
|---|--------------|--------------|--------------|
| C | -3.320049000 | 0.714715000  | -4.682077000 |
| H | -4.064806000 | 1.030380000  | -5.423878000 |
| H | -3.780945000 | 0.784664000  | -3.692264000 |
| C | -1.540844000 | 1.670835000  | -6.102582000 |
| H | -1.910170000 | 2.562286000  | -6.622098000 |
| H | -1.901830000 | 0.805061000  | -6.666081000 |
| C | -0.040353000 | 1.631092000  | -6.060070000 |
| C | 0.752744000  | 2.042192000  | -7.132327000 |
| H | 0.291157000  | 2.482764000  | -8.008764000 |
| C | 2.138750000  | 1.863557000  | -7.066286000 |
| H | 2.770850000  | 2.170999000  | -7.891261000 |
| C | 2.691488000  | 1.277323000  | -5.923110000 |
| H | 3.757490000  | 1.107794000  | -5.838723000 |
| C | 1.852322000  | 0.906509000  | -4.874347000 |
| H | 2.231385000  | 0.450615000  | -3.972038000 |
| C | -2.338022000 | 3.003753000  | -4.177494000 |
| H | -3.353341000 | 3.346811000  | -4.412884000 |
| H | -1.642301000 | 3.663086000  | -4.702296000 |
| C | -2.079751000 | 3.047985000  | -2.685142000 |
| H | -2.058287000 | 4.080934000  | -2.321228000 |
| H | -2.867542000 | 2.521697000  | -2.142723000 |
| C | -0.782117000 | 1.957480000  | -0.915345000 |
| H | -1.027027000 | 2.811530000  | -0.275971000 |
| H | 0.226594000  | 1.618384000  | -0.661290000 |
| C | -1.754242000 | 0.828057000  | -0.742747000 |
| C | -2.384533000 | 0.544949000  | 0.468031000  |
| H | -2.222432000 | 1.191689000  | 1.322525000  |
| C | -3.213680000 | -0.578555000 | 0.563595000  |
| H | -3.710383000 | -0.816611000 | 1.497040000  |
| C | -3.380862000 | -1.390545000 | -0.560789000 |
| H | -3.993488000 | -2.282394000 | -0.524468000 |
| C | -2.730387000 | -1.053999000 | -1.746687000 |
| H | -2.810894000 | -1.684843000 | -2.615766000 |
| C | 0.454032000  | 3.254730000  | -2.658455000 |
| H | 0.419110000  | 3.478986000  | -3.725822000 |
| H | 1.318582000  | 2.611994000  | -2.478050000 |
| C | 0.543144000  | 4.531368000  | -1.850930000 |
| C | 0.000870000  | 5.732202000  | -2.347811000 |
| H | -0.468745000 | 5.751727000  | -3.328685000 |
| C | 0.096058000  | 6.918107000  | -1.611929000 |
| H | -0.318382000 | 7.837468000  | -2.010703000 |
| C | 0.743631000  | 6.920590000  | -0.370846000 |
| H | 0.824860000  | 7.840556000  | 0.197237000  |
| C | 1.306264000  | 5.737943000  | 0.125165000  |
| H | 1.831021000  | 5.743344000  | 1.074232000  |
| C | 1.210159000  | 4.552962000  | -0.611206000 |
| H | 1.679361000  | 3.649163000  | -0.231321000 |
| N | 0.599476000  | -0.079404000 | -2.441446000 |
| O | -0.295190000 | -2.700218000 | -1.733227000 |
| S | 1.051386000  | -1.846329000 | -2.112085000 |
| O | 1.879857000  | -2.215968000 | -3.492524000 |
| C | 2.210572000  | -1.840457000 | -0.664032000 |
| C | 3.563764000  | -1.611855000 | -0.902705000 |
| C | 1.681539000  | -2.106215000 | 0.596697000  |
| H | 0.627531000  | -2.323245000 | 0.724237000  |
| H | 3.937465000  | -1.454794000 | -1.907613000 |
| C | 4.426017000  | -1.640356000 | 0.195940000  |
| H | 5.487167000  | -1.477440000 | 0.039911000  |
| C | 3.946358000  | -1.897085000 | 1.496596000  |
| C | 2.567775000  | -2.127884000 | 1.676870000  |
| C | 4.897714000  | -1.964670000 | 2.665535000  |
| H | 2.187482000  | -2.343896000 | 2.669692000  |
| H | 5.747346000  | -1.288386000 | 2.533226000  |
| H | 4.400450000  | -1.712498000 | 3.606397000  |
| H | 5.303995000  | -2.979156000 | 2.773134000  |

<sup>5</sup>[Fe<sup>IV</sup>(NTs)(Bntpen)]<sup>2+</sup> Conformer 4a

|    |              |              |              |
|----|--------------|--------------|--------------|
| Fe | -0.620379000 | 0.502745000  | -3.660612000 |
| N  | 0.073504000  | 2.585816000  | -4.010195000 |
| N  | -1.345253000 | 0.843115000  | -1.758520000 |
| N  | -2.398685000 | 1.618365000  | -4.134845000 |
| N  | -1.933841000 | -1.210285000 | -4.297106000 |
| N  | 0.121702000  | 0.020151000  | -5.634570000 |
| C  | 1.197562000  | 3.193111000  | -3.546629000 |
| H  | 1.782322000  | 2.648973000  | -2.813790000 |
| C  | 1.569759000  | 4.466217000  | -3.987788000 |
| H  | 2.474508000  | 4.919807000  | -3.602773000 |
| C  | 0.763040000  | 5.131862000  | -4.915001000 |
| H  | 1.032631000  | 6.119003000  | -5.272733000 |
| C  | -0.417441000 | 4.518722000  | -5.360474000 |
| H  | -1.079682000 | 5.028006000  | -6.051629000 |
| C  | -0.737310000 | 3.246589000  | -4.890097000 |
| C  | -2.004296000 | 2.516610000  | -5.273525000 |
| H  | -2.810102000 | 3.226636000  | -5.502998000 |
| H  | -1.849970000 | 1.890947000  | -6.157779000 |
| C  | -2.767963000 | 2.439973000  | -2.921671000 |
| H  | -3.840241000 | 2.669027000  | -2.936069000 |
| H  | -2.235331000 | 3.393844000  | -2.975450000 |
| C  | -2.371527000 | 1.736398000  | -1.654029000 |
| C  | -2.955995000 | 2.020952000  | -0.419070000 |
| H  | -3.777206000 | 2.725830000  | -0.357729000 |
| C  | -2.462896000 | 1.395482000  | 0.731955000  |
| H  | -2.901481000 | 1.609595000  | 1.699790000  |
| C  | -1.399029000 | 0.493065000  | 0.617023000  |
| H  | -0.988808000 | -0.003460000 | 1.487210000  |
| C  | -0.864773000 | 0.235065000  | -0.642663000 |
| H  | -0.046978000 | -0.455026000 | -0.792465000 |
| C  | -3.528314000 | 0.677419000  | -4.481139000 |
| H  | -4.254581000 | 1.185811000  | -5.128686000 |
| H  | -4.040552000 | 0.435638000  | -3.546539000 |
| C  | -3.011517000 | -0.590379000 | -5.141042000 |
| H  | -3.833506000 | -1.299553000 | -5.297332000 |
| H  | -2.584216000 | -0.366495000 | -6.121792000 |
| C  | -1.037999000 | -2.069315000 | -5.129425000 |
| H  | -1.614107000 | -2.819858000 | -5.682467000 |
| H  | -0.370471000 | -2.599060000 | -4.441019000 |
| C  | -0.208330000 | -1.230311000 | -6.064311000 |
| C  | 0.260221000  | -1.724615000 | -7.283087000 |
| H  | -0.035159000 | -2.715242000 | -7.609371000 |
| C  | 1.114468000  | -0.937520000 | -8.062599000 |
| H  | 1.491125000  | -1.308662000 | -9.008762000 |
| C  | 1.481320000  | 0.327816000  | -7.595944000 |
| H  | 2.158885000  | 0.959804000  | -8.156047000 |
| C  | 0.972489000  | 0.774444000  | -6.377648000 |
| H  | 1.262875000  | 1.728523000  | -5.969943000 |
| C  | -2.471266000 | -1.984564000 | -3.091401000 |
| H  | -3.041392000 | -1.274730000 | -2.487705000 |
| H  | -1.585273000 | -2.270841000 | -2.517824000 |
| C  | -3.322547000 | -3.193042000 | -3.419860000 |
| C  | -4.722324000 | -3.076132000 | -3.515831000 |
| H  | -5.201865000 | -2.118864000 | -3.323940000 |
| C  | -5.513947000 | -4.189754000 | -3.816400000 |
| H  | -6.591743000 | -4.086816000 | -3.878998000 |
| C  | -4.915658000 | -5.439178000 | -4.017372000 |
| H  | -5.528518000 | -6.304685000 | -4.243221000 |
| C  | -3.526307000 | -5.573458000 | -3.904460000 |
| H  | -3.062785000 | -6.545236000 | -4.034902000 |
| C  | -2.736117000 | -4.459098000 | -3.604821000 |
| H  | -1.662620000 | -4.582305000 | -3.488154000 |
| N  | 0.686594000  | -0.569753000 | -3.053290000 |
| O  | 3.060201000  | 0.404375000  | -4.259517000 |
| S  | 2.476941000  | -0.067832000 | -2.804854000 |
| O  | 2.399381000  | 1.020919000  | -1.573585000 |

|   |             |              |              |
|---|-------------|--------------|--------------|
| C | 3.336695000 | -1.606394000 | -2.229707000 |
| C | 3.424581000 | -1.831960000 | -0.856586000 |
| C | 3.896046000 | -2.444742000 | -3.190551000 |
| H | 3.843249000 | -2.203189000 | -4.245662000 |
| H | 3.016849000 | -1.122213000 | -0.146364000 |
| C | 4.106038000 | -2.974765000 | -0.435070000 |
| H | 4.207706000 | -3.168101000 | 0.627707000  |
| C | 4.683419000 | -3.867564000 | -1.362934000 |
| C | 4.571626000 | -3.581613000 | -2.738055000 |
| C | 5.410976000 | -5.098919000 | -0.883633000 |
| H | 5.032875000 | -4.245582000 | -3.461024000 |
| H | 4.709177000 | -5.830088000 | -0.462224000 |
| H | 5.954287000 | -5.588819000 | -1.695271000 |
| H | 6.129541000 | -4.852370000 | -0.094439000 |

**$^5[\text{Fe}^{\text{IV}}(\text{NTs})(\text{Bntpen})]^{2+}$  Conformer 4b**

|    |              |              |              |
|----|--------------|--------------|--------------|
| Fe | -0.650385000 | 0.535203000  | -3.378511000 |
| N  | -1.623563000 | -1.069003000 | -4.570636000 |
| N  | 0.712057000  | 1.049341000  | -4.839739000 |
| N  | -1.952195000 | 1.560994000  | -4.754786000 |
| N  | -0.842698000 | 2.485228000  | -2.275279000 |
| N  | -2.015905000 | 0.058883000  | -1.770169000 |
| C  | -1.178176000 | -2.329328000 | -4.814032000 |
| H  | -0.170267000 | -2.563541000 | -4.491760000 |
| C  | -1.982601000 | -3.270674000 | -5.462526000 |
| H  | -1.599728000 | -4.268250000 | -5.637894000 |
| C  | -3.266456000 | -2.903925000 | -5.876080000 |
| H  | -3.909040000 | -3.617915000 | -6.378476000 |
| C  | -3.707844000 | -1.590193000 | -5.658047000 |
| H  | -4.684930000 | -1.269669000 | -6.001842000 |
| C  | -2.864071000 | -0.693954000 | -5.004838000 |
| C  | -3.220855000 | 0.754425000  | -4.761187000 |
| H  | -3.909782000 | 1.122907000  | -5.532992000 |
| H  | -3.707436000 | 0.885298000  | -3.789886000 |
| C  | -1.303605000 | 1.533235000  | -6.118836000 |
| H  | -1.662794000 | 2.375330000  | -6.722321000 |
| H  | -1.614469000 | 0.617532000  | -6.630437000 |
| C  | 0.195444000  | 1.537527000  | -6.004764000 |
| C  | 1.029248000  | 1.940755000  | -7.048772000 |
| H  | 0.601003000  | 2.335521000  | -7.962983000 |
| C  | 2.416122000  | 1.818587000  | -6.903614000 |
| H  | 3.077600000  | 2.121646000  | -7.707057000 |
| C  | 2.935778000  | 1.299783000  | -5.711997000 |
| H  | 4.002655000  | 1.183974000  | -5.569152000 |
| C  | 2.057803000  | 0.928130000  | -4.697205000 |
| H  | 2.401491000  | 0.524724000  | -3.755637000 |
| C  | -2.158808000 | 2.990493000  | -4.311290000 |
| H  | -3.114311000 | 3.368426000  | -4.698044000 |
| H  | -1.365479000 | 3.586116000  | -4.769898000 |
| C  | -2.102318000 | 3.114809000  | -2.797932000 |
| H  | -2.157104000 | 4.169320000  | -2.501249000 |
| H  | -2.951042000 | 2.602268000  | -2.338147000 |
| C  | -1.007272000 | 2.082620000  | -0.845605000 |
| H  | -1.331109000 | 2.930527000  | -0.231335000 |
| H  | -0.022576000 | 1.764521000  | -0.485924000 |
| C  | -1.968946000 | 0.930365000  | -0.723237000 |
| C  | -2.731873000 | 0.722293000  | 0.427362000  |
| H  | -2.690806000 | 1.443612000  | 1.235479000  |
| C  | -3.532401000 | -0.420979000 | 0.525113000  |
| H  | -4.127056000 | -0.599859000 | 1.413504000  |
| C  | -3.544308000 | -1.330494000 | -0.536090000 |
| H  | -4.132072000 | -2.238723000 | -0.492549000 |
| C  | -2.772597000 | -1.064055000 | -1.665832000 |
| H  | -2.730237000 | -1.760191000 | -2.486971000 |
| C  | 0.399584000  | 3.358143000  | -2.464293000 |
| H  | 0.499588000  | 3.533438000  | -3.537920000 |

|   |              |              |              |
|---|--------------|--------------|--------------|
| H | 1.240030000  | 2.732172000  | -2.151552000 |
| C | 0.391458000  | 4.674081000  | -1.715675000 |
| C | -0.083007000 | 5.846203000  | -2.334549000 |
| H | -0.420601000 | 5.816446000  | -3.368131000 |
| C | -0.089049000 | 7.065017000  | -1.647787000 |
| H | -0.449504000 | 7.961808000  | -2.139714000 |
| C | 0.387329000  | 7.129329000  | -0.333089000 |
| H | 0.389965000  | 8.074711000  | 0.197891000  |
| C | 0.880402000  | 5.974737000  | 0.287361000  |
| H | 1.272908000  | 6.026850000  | 1.297037000  |
| C | 0.885376000  | 4.756921000  | -0.400182000 |
| H | 1.299616000  | 3.874469000  | 0.080388000  |
| N | 0.631657000  | -0.096853000 | -2.291106000 |
| O | -0.280371000 | -2.692638000 | -1.580316000 |
| S | 1.070221000  | -1.911196000 | -2.074946000 |
| O | 1.746791000  | -2.307992000 | -3.521387000 |
| C | 2.356822000  | -1.945996000 | -0.741262000 |
| C | 3.695748000  | -1.885299000 | -1.121333000 |
| C | 1.929659000  | -2.069778000 | 0.579393000  |
| H | 0.877123000  | -2.155571000 | 0.822549000  |
| H | 3.978829000  | -1.832878000 | -2.166084000 |
| C | 4.655421000  | -1.944939000 | -0.108058000 |
| H | 5.706907000  | -1.913573000 | -0.372796000 |
| C | 4.283189000  | -2.064088000 | 1.246493000  |
| C | 2.911911000  | -2.125212000 | 1.570452000  |
| C | 5.331856000  | -2.164953000 | 2.325611000  |
| H | 2.612007000  | -2.233023000 | 2.607438000  |
| H | 6.258522000  | -1.661345000 | 2.036419000  |
| H | 4.984219000  | -1.731968000 | 3.268117000  |
| H | 5.580329000  | -3.216327000 | 2.523175000  |



**BnTPEN: <sup>3</sup>TS1<sub>NTs,CHD</sub>**

|    |              |              |              |
|----|--------------|--------------|--------------|
| Fe | -0.150957000 | 0.939272000  | -2.945593000 |
| N  | -0.834505000 | -0.563488000 | -4.155610000 |
| N  | 1.065627000  | 1.508334000  | -4.488362000 |
| N  | -1.572180000 | 1.943771000  | -4.168233000 |
| N  | -0.238666000 | 2.726715000  | -1.806857000 |
| N  | -1.363624000 | 0.354989000  | -1.382216000 |
| C  | -0.177456000 | -1.673068000 | -4.573003000 |
| H  | 0.864244000  | -1.771729000 | -4.297083000 |
| C  | -0.813540000 | -2.657076000 | -5.335813000 |
| H  | -0.255005000 | -3.533282000 | -5.639650000 |
| C  | -2.155415000 | -2.495666000 | -5.681834000 |
| H  | -2.672662000 | -3.250541000 | -6.262746000 |
| C  | -2.820063000 | -1.322065000 | -5.295921000 |
| H  | -3.847024000 | -1.142056000 | -5.593386000 |
| C  | -2.136529000 | -0.370556000 | -4.543406000 |
| C  | -2.720852000 | 0.976301000  | -4.177486000 |
| H  | -3.492824000 | 1.277677000  | -4.898020000 |
| H  | -3.173761000 | 0.974290000  | -3.182271000 |
| C  | -1.026564000 | 2.113159000  | -5.562221000 |
| H  | -1.436818000 | 3.018628000  | -6.023664000 |
| H  | -1.362227000 | 1.270903000  | -6.176006000 |
| C  | 0.474385000  | 2.114276000  | -5.556073000 |
| C  | 1.216556000  | 2.571846000  | -6.647558000 |
| H  | 0.715129000  | 3.067727000  | -7.471122000 |
| C  | 2.595766000  | 2.347231000  | -6.680242000 |
| H  | 3.188048000  | 2.684725000  | -7.522874000 |
| C  | 3.186181000  | 1.646783000  | -5.623504000 |
| H  | 4.240747000  | 1.399832000  | -5.636804000 |
| C  | 2.398056000  | 1.245910000  | -4.545912000 |
| H  | 2.794636000  | 0.662460000  | -3.731108000 |
| C  | -1.878316000 | 3.299200000  | -3.588369000 |
| H  | -2.916914000 | 3.584745000  | -3.800247000 |
| H  | -1.234901000 | 4.021063000  | -4.096938000 |
| C  | -1.603457000 | 3.318595000  | -2.101684000 |
| H  | -1.658153000 | 4.341142000  | -1.713002000 |
| H  | -2.347436000 | 2.723209000  | -1.571175000 |
| C  | -0.239673000 | 2.261578000  | -0.379716000 |
| H  | -0.520257000 | 3.075627000  | 0.298416000  |
| H  | 0.778165000  | 1.942323000  | -0.138485000 |
| C  | -1.183163000 | 1.098652000  | -0.250209000 |
| C  | -1.822168000 | 0.777724000  | 0.947219000  |
| H  | -1.674332000 | 1.403076000  | 1.820304000  |
| C  | -2.654917000 | -0.346808000 | 1.001428000  |
| H  | -3.163223000 | -0.610390000 | 1.921846000  |
| C  | -2.818199000 | -1.119021000 | -0.150687000 |
| H  | -3.439550000 | -2.005581000 | -0.150775000 |
| C  | -2.154594000 | -0.746658000 | -1.320092000 |
| H  | -2.228728000 | -1.347165000 | -2.210618000 |
| C  | 0.892306000  | 3.716322000  | -2.086028000 |
| H  | 0.933404000  | 3.837222000  | -3.170054000 |
| H  | 1.807827000  | 3.205644000  | -1.781341000 |
| C  | 0.770308000  | 5.073702000  | -1.421728000 |
| C  | 0.317039000  | 6.181541000  | -2.162607000 |
| H  | 0.071310000  | 6.062954000  | -3.215428000 |
| C  | 0.205557000  | 7.444846000  | -1.571685000 |
| H  | -0.138225000 | 8.289060000  | -2.159333000 |
| C  | 0.549080000  | 7.619772000  | -0.226226000 |
| H  | 0.466356000  | 8.598335000  | 0.233483000  |
| C  | 1.015362000  | 6.530299000  | 0.519743000  |
| H  | 1.298894000  | 6.667187000  | 1.557894000  |
| C  | 1.129741000  | 5.268808000  | -0.074276000 |
| H  | 1.527550000  | 4.441528000  | 0.505296000  |
| N  | 1.263547000  | 0.231310000  | -1.982667000 |
| O  | 0.058927000  | -2.361622000 | -1.762139000 |
| S  | 1.513931000  | -1.595485000 | -1.759049000 |

|   |             |              |              |
|---|-------------|--------------|--------------|
| O | 2.606004000 | -1.964243000 | -2.945631000 |
| C | 2.318332000 | -2.019913000 | -0.128353000 |
| C | 3.622016000 | -2.507262000 | -0.158946000 |
| C | 1.561203000 | -1.944178000 | 1.038564000  |
| H | 0.528021000 | -1.617215000 | 1.017670000  |
| H | 4.148885000 | -2.600419000 | -1.101886000 |
| C | 4.200549000 | -2.905608000 | 1.051174000  |
| H | 5.211543000 | -3.299862000 | 1.050498000  |
| C | 3.485999000 | -2.829288000 | 2.262560000  |
| C | 2.163346000 | -2.342306000 | 2.236042000  |
| C | 4.106683000 | -3.303903000 | 3.554130000  |
| H | 1.593816000 | -2.297730000 | 3.158719000  |
| H | 5.189776000 | -3.150046000 | 3.561874000  |
| H | 3.680569000 | -2.790409000 | 4.420975000  |
| H | 3.931350000 | -4.378743000 | 3.693757000  |
| H | 4.686743000 | 0.442033000  | 0.756953000  |
| H | 2.957318000 | 0.499059000  | 0.804490000  |
| C | 3.822909000 | 1.026857000  | 0.385394000  |
| C | 3.928552000 | 2.405599000  | 0.963910000  |
| H | 3.736838000 | 2.520513000  | 2.027369000  |
| H | 4.471633000 | 4.447125000  | 0.674746000  |
| C | 4.338864000 | 3.472068000  | 0.218856000  |
| C | 4.641964000 | 3.309958000  | -1.179659000 |
| H | 5.076161000 | 4.143372000  | -1.722132000 |
| H | 2.630313000 | 0.803132000  | -1.548795000 |
| H | 4.681431000 | 2.017708000  | -2.870859000 |
| C | 4.417102000 | 2.110213000  | -1.821987000 |
| C | 3.826032000 | 0.964668000  | -1.149347000 |
| H | 4.202823000 | 0.010804000  | -1.535823000 |

**BnTPEN: <sup>3</sup>IR1<sub>NTs,CHD</sub>**

|    |              |              |              |
|----|--------------|--------------|--------------|
| Fe | -0.299480000 | 0.861596000  | -3.036923000 |
| N  | -0.998864000 | -0.615316000 | -4.243697000 |
| N  | 1.020347000  | 1.464830000  | -4.488439000 |
| N  | -1.619641000 | 1.901191000  | -4.277962000 |
| N  | -0.312536000 | 2.608761000  | -1.873627000 |
| N  | -1.585729000 | 0.296464000  | -1.530524000 |
| C  | -0.373598000 | -1.762961000 | -4.601898000 |
| H  | 0.650860000  | -1.901777000 | -4.277852000 |
| C  | -1.026306000 | -2.739487000 | -5.361264000 |
| H  | -0.497219000 | -3.648542000 | -5.617625000 |
| C  | -2.344676000 | -2.527664000 | -5.765935000 |
| H  | -2.871803000 | -3.274567000 | -6.348258000 |
| C  | -2.974037000 | -1.317544000 | -5.433806000 |
| H  | -3.981929000 | -1.104858000 | -5.771992000 |
| C  | -2.279637000 | -0.378000000 | -4.678029000 |
| C  | -2.818002000 | 0.994490000  | -4.338503000 |
| H  | -3.537396000 | 1.337030000  | -5.093205000 |
| H  | -3.314752000 | 1.015535000  | -3.364851000 |
| C  | -1.025550000 | 2.043717000  | -5.657440000 |
| H  | -1.426822000 | 2.937766000  | -6.147759000 |
| H  | -1.333362000 | 1.185532000  | -6.262460000 |
| C  | 0.471148000  | 2.063011000  | -5.585148000 |
| C  | 1.255264000  | 2.553639000  | -6.630684000 |
| H  | 0.782049000  | 3.037257000  | -7.477747000 |
| C  | 2.642443000  | 2.388843000  | -6.583168000 |
| H  | 3.268551000  | 2.755212000  | -7.388305000 |
| C  | 3.199823000  | 1.723437000  | -5.487576000 |
| H  | 4.265457000  | 1.542097000  | -5.424214000 |
| C  | 2.367365000  | 1.279002000  | -4.462077000 |
| H  | 2.772482000  | 0.744121000  | -3.619905000 |
| C  | -1.867319000 | 3.275796000  | -3.703673000 |
| H  | -2.882101000 | 3.614281000  | -3.947289000 |
| H  | -1.169292000 | 3.957725000  | -4.195683000 |
| C  | -1.634491000 | 3.282190000  | -2.208492000 |
| H  | -1.634029000 | 4.306650000  | -1.822145000 |

|   |              |              |              |
|---|--------------|--------------|--------------|
| H | -2.427887000 | 2.736199000  | -1.696341000 |
| C | -0.391656000 | 2.120358000  | -0.453371000 |
| H | -0.653692000 | 2.941378000  | 0.222742000  |
| H | 0.599067000  | 1.749364000  | -0.176056000 |
| C | -1.391382000 | 1.003165000  | -0.377127000 |
| C | -2.063529000 | 0.680070000  | 0.801423000  |
| H | -1.903041000 | 1.277190000  | 1.691815000  |
| C | -2.941852000 | -0.409862000 | 0.815363000  |
| H | -3.473868000 | -0.675590000 | 1.721553000  |
| C | -3.115522000 | -1.148086000 | -0.357001000 |
| H | -3.767573000 | -2.011673000 | -0.387151000 |
| C | -2.417638000 | -0.776242000 | -1.505086000 |
| H | -2.502276000 | -1.355783000 | -2.408345000 |
| C | 0.884924000  | 3.552620000  | -2.068546000 |
| H | 0.950694000  | 3.745995000  | -3.140416000 |
| H | 1.769322000  | 2.977701000  | -1.779837000 |
| C | 0.814598000  | 4.858467000  | -1.305333000 |
| C | 0.337484000  | 6.022743000  | -1.937840000 |
| H | 0.042511000  | 5.988396000  | -2.984418000 |
| C | 0.269361000  | 7.237340000  | -1.247307000 |
| H | -0.092452000 | 8.127245000  | -1.750604000 |
| C | 0.683355000  | 7.305203000  | 0.088227000  |
| H | 0.635905000  | 8.246455000  | 0.624480000  |
| C | 1.179288000  | 6.159685000  | 0.722823000  |
| H | 1.524215000  | 6.216084000  | 1.749649000  |
| C | 1.249776000  | 4.945991000  | 0.030631000  |
| H | 1.684224000  | 4.078631000  | 0.518352000  |
| N | 1.045246000  | 0.044760000  | -2.032646000 |
| O | -0.205521000 | -2.401961000 | -1.623103000 |
| S | 1.285927000  | -1.737382000 | -1.732043000 |
| O | 2.285584000  | -2.244518000 | -2.940393000 |
| C | 2.201350000  | -1.956178000 | -0.123357000 |
| C | 3.485720000  | -2.490530000 | -0.189622000 |
| C | 1.543794000  | -1.689418000 | 1.075521000  |
| H | 0.524208000  | -1.321805000 | 1.090709000  |
| H | 3.935273000  | -2.722167000 | -1.148289000 |
| C | 4.148403000  | -2.743114000 | 1.015809000  |
| H | 5.147058000  | -3.166461000 | 0.990998000  |
| C | 3.535388000  | -2.480410000 | 2.256378000  |
| C | 2.229846000  | -1.947532000 | 2.265645000  |
| C | 4.244847000  | -2.802546000 | 3.548865000  |
| H | 1.740190000  | -1.753825000 | 3.214431000  |
| H | 5.328667000  | -2.689426000 | 3.452785000  |
| H | 3.903908000  | -2.163244000 | 4.368349000  |
| H | 4.052679000  | -3.842308000 | 3.844831000  |
| H | 5.377117000  | 0.592525000  | 0.977179000  |
| H | 3.646919000  | 0.576957000  | 0.913390000  |
| C | 4.519947000  | 1.145536000  | 0.543154000  |
| C | 4.505739000  | 2.549825000  | 1.089492000  |
| H | 4.433981000  | 2.666471000  | 2.167160000  |
| H | 4.671872000  | 4.641324000  | 0.720464000  |
| C | 4.644438000  | 3.649034000  | 0.280425000  |
| C | 4.774922000  | 3.519260000  | -1.131449000 |
| H | 4.921904000  | 4.398995000  | -1.747572000 |
| H | 1.960493000  | 0.488200000  | -1.878248000 |
| H | 4.897742000  | 2.140324000  | -2.795227000 |
| C | 4.753876000  | 2.225629000  | -1.720901000 |
| C | 4.604932000  | 1.087028000  | -0.961821000 |
| H | 4.662559000  | 0.104470000  | -1.424284000 |

**BnTPEN: <sup>3</sup>PrdNTs,CHD**

|    |              |              |              |
|----|--------------|--------------|--------------|
| Fe | -0.348817000 | 0.906536000  | -2.639227000 |
| N  | -0.805736000 | -0.642252000 | -4.131172000 |
| N  | 1.282686000  | 1.689861000  | -3.631396000 |
| N  | -1.321971000 | 1.988088000  | -4.422938000 |
| N  | -0.953939000 | 2.788373000  | -1.629035000 |

|   |              |              |              |
|---|--------------|--------------|--------------|
| N | -1.971334000 | 0.272287000  | -1.552233000 |
| C | -0.239402000 | -1.870857000 | -4.230878000 |
| H | 0.564591000  | -2.092371000 | -3.544741000 |
| C | -0.696493000 | -2.833069000 | -5.132895000 |
| H | -0.216600000 | -3.802801000 | -5.176367000 |
| C | -1.778791000 | -2.521950000 | -5.961368000 |
| H | -2.159283000 | -3.248439000 | -6.670124000 |
| C | -2.359626000 | -1.251385000 | -5.869508000 |
| H | -3.190287000 | -0.974999000 | -6.509308000 |
| C | -1.854747000 | -0.331383000 | -4.948325000 |
| C | -2.420857000 | 1.066203000  | -4.806886000 |
| H | -2.910233000 | 1.374171000  | -5.743291000 |
| H | -3.179276000 | 1.093019000  | -4.016885000 |
| C | -0.282451000 | 2.076989000  | -5.483149000 |
| H | -0.478619000 | 2.916821000  | -6.164224000 |
| H | -0.321640000 | 1.168515000  | -6.092850000 |
| C | 1.093440000  | 2.198242000  | -4.885740000 |
| C | 2.138705000  | 2.782710000  | -5.608882000 |
| H | 1.943229000  | 3.179571000  | -6.598729000 |
| C | 3.417287000  | 2.852090000  | -5.053495000 |
| H | 4.236064000  | 3.298215000  | -5.605915000 |
| C | 3.610634000  | 2.347818000  | -3.763697000 |
| H | 4.573941000  | 2.396554000  | -3.273100000 |
| C | 2.530068000  | 1.787072000  | -3.089137000 |
| H | 2.661966000  | 1.426868000  | -2.079905000 |
| C | -1.755417000 | 3.334801000  | -3.949101000 |
| H | -2.622232000 | 3.697060000  | -4.521179000 |
| H | -0.934442000 | 4.030129000  | -4.145138000 |
| C | -2.090434000 | 3.326414000  | -2.462526000 |
| H | -2.351858000 | 4.339277000  | -2.132885000 |
| H | -2.960447000 | 2.691002000  | -2.282181000 |
| C | -1.486031000 | 2.306927000  | -0.312238000 |
| H | -2.043989000 | 3.094753000  | 0.207047000  |
| H | -0.630076000 | 2.040882000  | 0.319527000  |
| C | -2.339982000 | 1.090680000  | -0.522244000 |
| C | -3.420122000 | 0.793186000  | 0.307855000  |
| H | -3.686787000 | 1.477243000  | 1.104923000  |
| C | -4.134945000 | -0.390596000 | 0.109717000  |
| H | -4.972215000 | -0.642462000 | 0.750135000  |
| C | -3.743784000 | -1.242777000 | -0.925528000 |
| H | -4.256347000 | -2.179132000 | -1.107191000 |
| C | -2.666609000 | -0.884012000 | -1.732878000 |
| H | -2.329473000 | -1.536884000 | -2.518998000 |
| C | 0.158588000  | 3.813404000  | -1.430935000 |
| H | 0.567350000  | 4.026555000  | -2.420577000 |
| H | 0.939884000  | 3.302268000  | -0.859440000 |
| C | -0.238984000 | 5.107539000  | -0.747332000 |
| C | -0.547885000 | 6.247711000  | -1.512340000 |
| H | -0.484264000 | 6.203813000  | -2.597062000 |
| C | -0.907731000 | 7.450577000  | -0.894930000 |
| H | -1.137181000 | 8.321497000  | -1.499233000 |
| C | -0.957926000 | 7.532538000  | 0.501321000  |
| H | -1.231535000 | 8.465252000  | 0.981897000  |
| C | -0.637743000 | 6.411025000  | 1.276291000  |
| H | -0.658049000 | 6.476026000  | 2.358830000  |
| C | -0.278056000 | 5.209683000  | 0.656450000  |
| H | -0.010997000 | 4.354134000  | 1.271112000  |
| N | 1.069631000  | -0.213641000 | -1.207558000 |
| O | -0.547173000 | -0.856719000 | 0.966223000  |
| S | 0.376555000  | -1.652209000 | -0.112339000 |
| O | -0.221227000 | -2.668752000 | -1.237376000 |
| C | 1.783918000  | -2.485076000 | 0.781665000  |
| C | 2.486780000  | -3.489368000 | 0.118505000  |
| C | 2.035375000  | -2.102637000 | 2.098513000  |
| H | 1.427466000  | -1.350773000 | 2.588170000  |
| H | 2.222630000  | -3.793824000 | -0.887664000 |
| C | 3.514852000  | -4.125869000 | 0.818603000  |

|   |             |              |              |
|---|-------------|--------------|--------------|
| H | 4.074464000 | -4.917541000 | 0.331991000  |
| C | 3.822050000 | -3.774377000 | 2.149363000  |
| C | 3.068121000 | -2.759023000 | 2.773425000  |
| C | 4.907034000 | -4.498573000 | 2.905792000  |
| H | 3.280535000 | -2.490672000 | 3.802814000  |
| H | 5.673909000 | -4.893645000 | 2.233785000  |
| H | 5.392412000 | -3.846237000 | 3.637446000  |
| H | 4.487230000 | -5.349991000 | 3.457976000  |
| H | 4.116334000 | -0.289484000 | 0.818222000  |
| H | 1.527998000 | 0.427601000  | -0.543029000 |
| C | 4.131657000 | 0.778007000  | 0.620950000  |
| C | 3.152259000 | 1.612041000  | 1.184691000  |
| H | 2.384433000 | 1.192179000  | 1.829893000  |
| H | 2.480634000 | 3.652075000  | 1.449594000  |
| C | 3.211864000 | 3.000342000  | 0.981954000  |
| C | 4.248405000 | 3.553053000  | 0.218572000  |
| H | 4.309964000 | 4.628072000  | 0.085825000  |
| H | 1.790397000 | -0.644946000 | -1.799188000 |
| H | 6.052879000 | 3.153661000  | -0.897398000 |
| C | 5.228384000 | 2.720116000  | -0.340041000 |
| C | 5.169392000 | 1.333490000  | -0.142280000 |
| H | 5.946959000 | 0.693861000  | -0.547749000 |

**BnTPEN: <sup>3</sup>TS1<sub>NTs,DMS</sub>**

|    |              |              |              |
|----|--------------|--------------|--------------|
| Fe | -0.687101000 | 0.663365000  | -3.426635000 |
| N  | -1.379744000 | -0.942350000 | -4.544195000 |
| N  | 0.424459000  | 1.222083000  | -5.042439000 |
| N  | -2.281207000 | 1.562659000  | -4.772267000 |
| N  | -1.015706000 | 2.556153000  | -2.408011000 |
| N  | -1.788591000 | 0.071626000  | -1.790614000 |
| C  | -0.672591000 | -2.053434000 | -4.873027000 |
| H  | 0.368062000  | -2.089725000 | -4.581335000 |
| C  | -1.260281000 | -3.112727000 | -5.569579000 |
| H  | -0.665313000 | -3.985371000 | -5.807508000 |
| C  | -2.602922000 | -3.025481000 | -5.942381000 |
| H  | -3.083403000 | -3.838176000 | -6.474904000 |
| C  | -3.315275000 | -1.854519000 | -5.647881000 |
| H  | -4.344652000 | -1.736012000 | -5.966677000 |
| C  | -2.679990000 | -0.824364000 | -4.956653000 |
| C  | -3.336490000 | 0.509793000  | -4.680113000 |
| H  | -4.156325000 | 0.688655000  | -5.390392000 |
| H  | -3.759816000 | 0.542903000  | -3.670859000 |
| C  | -1.715265000 | 1.671491000  | -6.148669000 |
| H  | -2.147523000 | 2.526151000  | -6.683702000 |
| H  | -1.995862000 | 0.778585000  | -6.718588000 |
| C  | -0.210795000 | 1.749318000  | -6.128370000 |
| C  | 0.503261000  | 2.222210000  | -7.232414000 |
| H  | -0.030503000 | 2.655971000  | -8.070591000 |
| C  | 1.895731000  | 2.103245000  | -7.257448000 |
| H  | 2.462844000  | 2.461500000  | -8.108782000 |
| C  | 2.535879000  | 1.487063000  | -6.178049000 |
| H  | 3.607242000  | 1.330377000  | -6.176939000 |
| C  | 1.773949000  | 1.061965000  | -5.091909000 |
| H  | 2.214240000  | 0.539712000  | -4.259468000 |
| C  | -2.678082000 | 2.902264000  | -4.241998000 |
| H  | -3.733833000 | 3.117280000  | -4.460281000 |
| H  | -2.085050000 | 3.652310000  | -4.771126000 |
| C  | -2.423391000 | 2.989806000  | -2.749720000 |
| H  | -2.592913000 | 4.011726000  | -2.390814000 |
| H  | -3.111076000 | 2.335198000  | -2.210677000 |
| C  | -0.975340000 | 2.201102000  | -0.951425000 |
| H  | -1.355477000 | 3.021946000  | -0.332720000 |
| H  | 0.069547000  | 2.020662000  | -0.687038000 |
| C  | -1.762151000 | 0.939757000  | -0.736164000 |
| C  | -2.409563000 | 0.652594000  | 0.465898000  |
| H  | -2.383675000 | 1.373186000  | 1.275304000  |

|   |              |              |              |
|---|--------------|--------------|--------------|
| C | -3.091923000 | -0.561176000 | 0.605800000  |
| H | -3.603019000 | -0.801091000 | 1.531113000  |
| C | -3.103595000 | -1.453868000 | -0.468835000 |
| H | -3.609407000 | -2.408751000 | -0.401338000 |
| C | -2.439372000 | -1.111905000 | -1.646297000 |
| H | -2.394115000 | -1.796960000 | -2.475274000 |
| C | 0.019779000  | 3.623667000  | -2.764707000 |
| H | -0.020107000 | 3.740928000  | -3.849572000 |
| H | 0.990403000  | 3.186983000  | -2.521452000 |
| C | -0.151726000 | 4.966693000  | -2.083642000 |
| C | -0.855340000 | 6.007450000  | -2.718500000 |
| H | -1.265635000 | 5.855056000  | -3.713933000 |
| C | -1.006283000 | 7.252977000  | -2.099547000 |
| H | -1.544903000 | 8.046879000  | -2.605304000 |
| C | -0.448545000 | 7.478138000  | -0.835683000 |
| H | -0.559111000 | 8.444798000  | -0.357068000 |
| C | 0.269260000  | 6.458011000  | -0.199482000 |
| H | 0.721474000  | 6.636997000  | 0.770041000  |
| C | 0.418939000  | 5.214228000  | -0.821170000 |
| H | 1.005556000  | 4.441164000  | -0.331586000 |
| N | 0.875344000  | 0.183270000  | -2.067974000 |
| O | -0.031366000 | -2.465080000 | -2.032838000 |
| S | 1.377775000  | -1.619805000 | -2.091355000 |
| O | 2.346640000  | -1.858569000 | -3.412073000 |
| C | 2.359875000  | -2.064036000 | -0.572054000 |
| C | 3.615447000  | -2.637296000 | -0.759721000 |
| C | 1.763852000  | -1.932986000 | 0.681123000  |
| H | 0.766401000  | -1.522991000 | 0.790089000  |
| H | 4.014450000  | -2.767216000 | -1.758996000 |
| C | 4.316916000  | -3.064649000 | 0.373050000  |
| H | 5.293614000  | -3.520904000 | 0.249966000  |
| C | 3.768343000  | -2.936259000 | 1.663810000  |
| C | 2.486467000  | -2.363850000 | 1.797779000  |
| C | 4.517379000  | -3.438938000 | 2.873632000  |
| H | 2.044238000  | -2.271984000 | 2.784430000  |
| H | 5.600242000  | -3.380005000 | 2.731004000  |
| H | 4.258239000  | -2.873487000 | 3.773493000  |
| H | 4.272389000  | -4.491349000 | 3.068578000  |
| C | 4.494012000  | 0.435580000  | -2.318583000 |
| S | 2.896059000  | 1.341827000  | -1.806739000 |
| C | 3.128492000  | 1.424818000  | 0.068541000  |
| H | 4.233734000  | -0.249887000 | -3.125639000 |
| H | 5.205450000  | 1.196298000  | -2.641165000 |
| H | 4.869752000  | -0.122580000 | -1.462091000 |
| H | 4.048022000  | 1.979451000  | 0.261895000  |
| H | 2.273922000  | 1.965950000  | 0.472828000  |
| H | 3.175306000  | 0.417364000  | 0.478961000  |

**BnTPEN: <sup>3</sup>Prd<sub>NTs,DMS</sub>**

|    |              |              |              |
|----|--------------|--------------|--------------|
| Fe | -0.838683000 | 0.598940000  | -3.394890000 |
| N  | -1.505700000 | -1.159454000 | -4.255927000 |
| N  | 0.315288000  | 1.064330000  | -5.014092000 |
| N  | -2.426175000 | 1.307823000  | -4.929282000 |
| N  | -1.158057000 | 2.585171000  | -2.622849000 |
| N  | -1.871998000 | 0.170828000  | -1.682952000 |
| C  | -0.803062000 | -2.319211000 | -4.267268000 |
| H  | 0.176130000  | -2.285275000 | -3.806401000 |
| C  | -1.325738000 | -3.485469000 | -4.827618000 |
| H  | -0.739495000 | -4.396084000 | -4.826032000 |
| C  | -2.608215000 | -3.451169000 | -5.387269000 |
| H  | -3.039486000 | -4.341365000 | -5.830647000 |
| C  | -3.326059000 | -2.248296000 | -5.380665000 |
| H  | -4.315109000 | -2.191540000 | -5.821093000 |
| C  | -2.752205000 | -1.110759000 | -4.807976000 |
| C  | -3.445652000 | 0.239150000  | -4.765714000 |
| H  | -4.229849000 | 0.286707000  | -5.536316000 |

|   |              |              |              |
|---|--------------|--------------|--------------|
| H | -3.932345000 | 0.381891000  | -3.793977000 |
| C | -1.787937000 | 1.279404000  | -6.270677000 |
| H | -2.205718000 | 2.054828000  | -6.926952000 |
| H | -2.018586000 | 0.320465000  | -6.749638000 |
| C | -0.286164000 | 1.413136000  | -6.187794000 |
| C | 0.459694000  | 1.806517000  | -7.302814000 |
| H | -0.052039000 | 2.091645000  | -8.215405000 |
| C | 1.855348000  | 1.816065000  | -7.234951000 |
| H | 2.445744000  | 2.114457000  | -8.093675000 |
| C | 2.469581000  | 1.426698000  | -6.041221000 |
| H | 3.547684000  | 1.401781000  | -5.942333000 |
| C | 1.675875000  | 1.063292000  | -4.954611000 |
| H | 2.128351000  | 0.755792000  | -4.023950000 |
| C | -2.833244000 | 2.679899000  | -4.510952000 |
| H | -3.895474000 | 2.866599000  | -4.727186000 |
| H | -2.261063000 | 3.387043000  | -5.118101000 |
| C | -2.568809000 | 2.936780000  | -3.027387000 |
| H | -2.776346000 | 3.988078000  | -2.791145000 |
| H | -3.240925000 | 2.326706000  | -2.419342000 |
| C | -1.087842000 | 2.403424000  | -1.134091000 |
| H | -1.485428000 | 3.278713000  | -0.606844000 |
| H | -0.030949000 | 2.291934000  | -0.860689000 |
| C | -1.821723000 | 1.154705000  | -0.739684000 |
| C | -2.384976000 | 0.984529000  | 0.527956000  |
| H | -2.340340000 | 1.794457000  | 1.246799000  |
| C | -2.999943000 | -0.227603000 | 0.851029000  |
| H | -3.444805000 | -0.375950000 | 1.828315000  |
| C | -3.035541000 | -1.241824000 | -0.112205000 |
| H | -3.500830000 | -2.197552000 | 0.095649000  |
| C | -2.465031000 | -1.008828000 | -1.361401000 |
| H | -2.469240000 | -1.772448000 | -2.123537000 |
| C | -0.132651000 | 3.608785000  | -3.095433000 |
| H | -0.187806000 | 3.626377000  | -4.185424000 |
| H | 0.840327000  | 3.190247000  | -2.823579000 |
| C | -0.287321000 | 5.010576000  | -2.538824000 |
| C | -0.987383000 | 5.994588000  | -3.260832000 |
| H | -1.404211000 | 5.755411000  | -4.236209000 |
| C | -1.128648000 | 7.291187000  | -2.753782000 |
| H | -1.666489000 | 8.039915000  | -3.325177000 |
| C | -0.564886000 | 7.624209000  | -1.516904000 |
| H | -0.670120000 | 8.629655000  | -1.124556000 |
| C | 0.148378000  | 6.659488000  | -0.794607000 |
| H | 0.599422000  | 6.919283000  | 0.157227000  |
| C | 0.288533000  | 5.364494000  | -1.303960000 |
| H | 0.856151000  | 4.626096000  | -0.743172000 |
| N | 2.018627000  | 1.332493000  | -0.190106000 |
| O | 0.795747000  | -0.192035000 | -2.126095000 |
| S | 2.294809000  | -0.046333000 | -1.398135000 |
| O | 3.580803000  | 0.187781000  | -2.412430000 |
| C | 2.614137000  | -1.638443000 | -0.480941000 |
| C | 3.586775000  | -2.495653000 | -0.991510000 |
| C | 1.864276000  | -1.923154000 | 0.658271000  |
| H | 1.125216000  | -1.224880000 | 1.033667000  |
| H | 4.151650000  | -2.225393000 | -1.876188000 |
| C | 3.817950000  | -3.695715000 | -0.312280000 |
| H | 4.576730000  | -4.376058000 | -0.684833000 |
| C | 3.089759000  | -4.033138000 | 0.845675000  |
| C | 2.116912000  | -3.129394000 | 1.318482000  |
| C | 3.338052000  | -5.341839000 | 1.555676000  |
| H | 1.556356000  | -3.369993000 | 2.215799000  |
| H | 4.393456000  | -5.627395000 | 1.513717000  |
| H | 3.039308000  | -5.293785000 | 2.606479000  |
| H | 2.764353000  | -6.153191000 | 1.088436000  |
| C | 4.390330000  | 2.980681000  | -1.151191000 |
| S | 3.568306000  | 2.141258000  | 0.351735000  |
| C | 4.896494000  | 0.848081000  | 0.789272000  |
| H | 4.545248000  | 2.224204000  | -1.919419000 |

|   |             |             |              |
|---|-------------|-------------|--------------|
| H | 3.696616000 | 3.757140000 | -1.471339000 |
| H | 5.321408000 | 3.418641000 | -0.787788000 |
| H | 5.744842000 | 1.409900000 | 1.182837000  |
| H | 4.465001000 | 0.208305000 | 1.557410000  |
| H | 5.159306000 | 0.292040000 | -0.109787000 |

**BnTPEN: <sup>3</sup>Prd\_AlternativeNTs,DMS**

|    |              |              |              |
|----|--------------|--------------|--------------|
| Fe | 0.534029000  | -0.976153000 | -3.371403000 |
| N  | -0.951620000 | -1.677396000 | -4.529532000 |
| N  | 1.057393000  | 0.440710000  | -4.785625000 |
| N  | -1.000180000 | 0.508186000  | -2.947351000 |
| N  | 1.577619000  | -0.196747000 | -1.779876000 |
| N  | 0.793417000  | -2.715493000 | -2.375880000 |
| C  | -0.830217000 | -2.472543000 | -5.623516000 |
| H  | 0.175640000  | -2.756247000 | -5.908141000 |
| C  | -1.941739000 | -2.910030000 | -6.343273000 |
| H  | -1.807240000 | -3.544245000 | -7.210725000 |
| C  | -3.217395000 | -2.513509000 | -5.925829000 |
| H  | -4.099197000 | -2.838519000 | -6.465701000 |
| C  | -3.341244000 | -1.678776000 | -4.808109000 |
| H  | -4.316267000 | -1.343149000 | -4.473881000 |
| C  | -2.193675000 | -1.272474000 | -4.125117000 |
| C  | -2.217887000 | -0.360446000 | -2.915485000 |
| H  | -3.144588000 | 0.229090000  | -2.889438000 |
| H  | -2.182369000 | -0.953700000 | -1.993427000 |
| C  | -1.042538000 | 1.503128000  | -4.061863000 |
| H  | -1.246499000 | 2.508862000  | -3.674146000 |
| H  | -1.882473000 | 1.252332000  | -4.720469000 |
| C  | 0.227172000  | 1.511006000  | -4.894638000 |
| C  | 0.510962000  | 2.557141000  | -5.779083000 |
| H  | -0.156022000 | 3.409999000  | -5.840755000 |
| C  | 1.653783000  | 2.488682000  | -6.581229000 |
| H  | 1.884373000  | 3.289382000  | -7.274409000 |
| C  | 2.497542000  | 1.375571000  | -6.473609000 |
| H  | 3.392184000  | 1.288422000  | -7.077521000 |
| C  | 2.173466000  | 0.376216000  | -5.559704000 |
| H  | 2.807375000  | -0.492066000 | -5.424629000 |
| C  | -0.593512000 | 1.084979000  | -1.618532000 |
| H  | -1.471312000 | 1.259077000  | -0.982778000 |
| H  | -0.135517000 | 2.058540000  | -1.802924000 |
| C  | 0.399330000  | 0.173595000  | -0.890213000 |
| H  | 0.765743000  | 0.671350000  | 0.014573000  |
| H  | -0.083409000 | -0.760305000 | -0.584211000 |
| C  | 2.368805000  | -1.313395000 | -1.143882000 |
| H  | 2.556003000  | -1.131918000 | -0.081841000 |
| H  | 3.356638000  | -1.336458000 | -1.615139000 |
| C  | 1.695908000  | -2.638829000 | -1.351473000 |
| C  | 2.015591000  | -3.752997000 | -0.568590000 |
| H  | 2.754866000  | -3.633047000 | 0.218242000  |
| C  | 1.394004000  | -4.972961000 | -0.841476000 |
| H  | 1.629615000  | -5.850529000 | -0.250371000 |
| C  | 0.461368000  | -5.050681000 | -1.886179000 |
| H  | -0.041531000 | -5.980659000 | -2.121215000 |
| C  | 0.184460000  | -3.910032000 | -2.629418000 |
| H  | -0.527414000 | -3.928949000 | -3.441319000 |
| C  | 2.492152000  | 1.009720000  | -2.040042000 |
| H  | 1.949558000  | 1.682359000  | -2.704817000 |
| H  | 3.338765000  | 0.608936000  | -2.605261000 |
| C  | 2.951910000  | 1.775028000  | -0.814460000 |
| C  | 2.426803000  | 3.059190000  | -0.571100000 |
| H  | 1.712716000  | 3.492531000  | -1.268437000 |
| C  | 2.837832000  | 3.805351000  | 0.538101000  |
| H  | 2.430303000  | 4.796707000  | 0.705255000  |
| C  | 3.782117000  | 3.273339000  | 1.424088000  |
| H  | 4.102424000  | 3.849807000  | 2.285325000  |
| C  | 4.320354000  | 2.002419000  | 1.188425000  |



|   |             |              |              |
|---|-------------|--------------|--------------|
| H | 5.056900000 | 1.572420000  | 1.858557000  |
| C | 3.916581000 | 1.260460000  | 0.073249000  |
| H | 4.363163000 | 0.284018000  | -0.079404000 |
| N | 6.286171000 | -0.721309000 | 2.093330000  |
| O | 4.230205000 | -2.175537000 | 0.896033000  |
| S | 5.637550000 | -2.434354000 | 1.730614000  |
| O | 6.739627000 | -3.444360000 | 1.020332000  |
| C | 5.220949000 | -3.199162000 | 3.382018000  |
| C | 5.520678000 | -4.545469000 | 3.569014000  |
| C | 4.594540000 | -2.420368000 | 4.352631000  |
| H | 4.387677000 | -1.371106000 | 4.177587000  |
| H | 6.014968000 | -5.109375000 | 2.786223000  |
| C | 5.181237000 | -5.130311000 | 4.793853000  |
| H | 5.409443000 | -6.177717000 | 4.963134000  |
| C | 4.553120000 | -4.384713000 | 5.808625000  |
| C | 4.265572000 | -3.026287000 | 5.568194000  |
| C | 4.219553000 | -5.017117000 | 7.139129000  |
| H | 3.783242000 | -2.437253000 | 6.341803000  |
| H | 4.115154000 | -6.102546000 | 7.053479000  |
| H | 5.011528000 | -4.821886000 | 7.874179000  |
| H | 3.288870000 | -4.616119000 | 7.552942000  |
| C | 8.747678000 | -1.127128000 | 0.373148000  |
| S | 8.102878000 | -0.649800000 | 2.102147000  |
| C | 8.844933000 | -2.064708000 | 3.142261000  |
| H | 8.357662000 | -2.116670000 | 0.136394000  |
| H | 8.367263000 | -0.361169000 | -0.301224000 |
| H | 9.837128000 | -1.096158000 | 0.424882000  |
| H | 9.923241000 | -1.900372000 | 3.156563000  |
| H | 8.422661000 | -1.961425000 | 4.140783000  |
| H | 8.576013000 | -3.012027000 | 2.676609000  |

**<sup>1</sup>[Fe<sup>IV</sup>(O)(Bntpen)]<sup>2+</sup>**

|    |              |              |              |
|----|--------------|--------------|--------------|
| Fe | -0.702871000 | 0.523262000  | -3.571773000 |
| N  | 0.070550000  | 2.298672000  | -3.983281000 |
| N  | -1.640984000 | 1.242211000  | -1.940229000 |
| N  | -2.353296000 | 1.512311000  | -4.524464000 |
| N  | -1.814493000 | -1.154990000 | -3.899914000 |
| N  | 0.350264000  | -0.292054000 | -5.147292000 |
| C  | 1.143300000  | 2.818696000  | -3.334253000 |
| H  | 1.536183000  | 2.241872000  | -2.508034000 |
| C  | 1.704251000  | 4.031713000  | -3.735476000 |
| H  | 2.560692000  | 4.426307000  | -3.203067000 |
| C  | 1.146626000  | 4.716718000  | -4.821331000 |
| H  | 1.565489000  | 5.661378000  | -5.148429000 |
| C  | 0.031073000  | 4.176105000  | -5.477083000 |
| H  | -0.428260000 | 4.695568000  | -6.310163000 |
| C  | -0.490517000 | 2.959254000  | -5.040651000 |
| C  | -1.688716000 | 2.264409000  | -5.642917000 |
| H  | -2.375765000 | 2.979722000  | -6.112477000 |
| H  | -1.381318000 | 1.542988000  | -6.407408000 |
| C  | -2.973993000 | 2.482639000  | -3.547329000 |
| H  | -4.046900000 | 2.585232000  | -3.744851000 |
| H  | -2.531237000 | 3.471259000  | -3.709509000 |
| C  | -2.708761000 | 2.063167000  | -2.127350000 |
| C  | -3.451110000 | 2.545975000  | -1.047561000 |
| H  | -4.306453000 | 3.189063000  | -1.221652000 |
| C  | -3.069360000 | 2.199639000  | 0.253302000  |
| H  | -3.631756000 | 2.566406000  | 1.104178000  |
| C  | -1.950777000 | 1.378544000  | 0.437424000  |
| H  | -1.618807000 | 1.097368000  | 1.429124000  |
| C  | -1.259678000 | 0.910680000  | -0.678677000 |
| H  | -0.391914000 | 0.269046000  | -0.608970000 |
| C  | -3.355389000 | 0.477733000  | -4.969359000 |
| H  | -3.838062000 | 0.778099000  | -5.907610000 |
| H  | -4.135902000 | 0.429736000  | -4.206623000 |
| C  | -2.674496000 | -0.869724000 | -5.118524000 |

|   |              |              |              |
|---|--------------|--------------|--------------|
| H | -3.408820000 | -1.673057000 | -5.239192000 |
| H | -2.022025000 | -0.878309000 | -5.992898000 |
| C | -0.799937000 | -2.220608000 | -4.250496000 |
| H | -1.306426000 | -3.094895000 | -4.670529000 |
| H | -0.306369000 | -2.518419000 | -3.320889000 |
| C | 0.211447000  | -1.646601000 | -5.195892000 |
| C | 0.991963000  | -2.435579000 | -6.041779000 |
| H | 0.847844000  | -3.509524000 | -6.063547000 |
| C | 1.960706000  | -1.825800000 | -6.844236000 |
| H | 2.584447000  | -2.421106000 | -7.500724000 |
| C | 2.110690000  | -0.436121000 | -6.783696000 |
| H | 2.851460000  | 0.074388000  | -7.386443000 |
| C | 1.292555000  | 0.297820000  | -5.927801000 |
| H | 1.395647000  | 1.369659000  | -5.854797000 |
| C | -2.650210000 | -1.598283000 | -2.676644000 |
| H | -3.331165000 | -0.776046000 | -2.453361000 |
| H | -1.932404000 | -1.673039000 | -1.857667000 |
| C | -3.413334000 | -2.890901000 | -2.854524000 |
| C | -4.741499000 | -2.880557000 | -3.323836000 |
| H | -5.233241000 | -1.936386000 | -3.546856000 |
| C | -5.457486000 | -4.073413000 | -3.465961000 |
| H | -6.482332000 | -4.050987000 | -3.819581000 |
| C | -4.857258000 | -5.293369000 | -3.130734000 |
| H | -5.414178000 | -6.218046000 | -3.232562000 |
| C | -3.545091000 | -5.315549000 | -2.641501000 |
| H | -3.087930000 | -6.256317000 | -2.355541000 |
| C | -2.828800000 | -4.122812000 | -2.501798000 |
| H | -1.823334000 | -4.150458000 | -2.090262000 |
| O | 0.416814000  | -0.216934000 | -2.605446000 |

**<sup>3</sup>[Fe<sup>IV</sup>(O)(Bntpen)]<sup>2+</sup>**

|    |              |              |              |
|----|--------------|--------------|--------------|
| Fe | -0.709456000 | 0.548404000  | -3.587938000 |
| N  | 0.119379000  | 2.317801000  | -3.966524000 |
| N  | -1.672788000 | 1.242320000  | -1.964657000 |
| N  | -2.323434000 | 1.539969000  | -4.539889000 |
| N  | -1.818755000 | -1.165285000 | -3.858556000 |
| N  | 0.310706000  | -0.284250000 | -5.167512000 |
| C  | 1.198612000  | 2.822914000  | -3.323191000 |
| H  | 1.592692000  | 2.228251000  | -2.509648000 |
| C  | 1.767342000  | 4.035740000  | -3.717547000 |
| H  | 2.630345000  | 4.420561000  | -3.188652000 |
| C  | 1.208305000  | 4.732016000  | -4.795048000 |
| H  | 1.631470000  | 5.676414000  | -5.117459000 |
| C  | 0.087514000  | 4.202219000  | -5.452579000 |
| H  | -0.367990000 | 4.729616000  | -6.282937000 |
| C  | -0.440382000 | 2.986238000  | -5.021702000 |
| C  | -1.640215000 | 2.299251000  | -5.643216000 |
| H  | -2.317410000 | 3.023849000  | -6.112178000 |
| H  | -1.331587000 | 1.584069000  | -6.412861000 |
| C  | -2.957392000 | 2.514078000  | -3.573869000 |
| H  | -4.022229000 | 2.635353000  | -3.801476000 |
| H  | -2.492161000 | 3.495647000  | -3.713527000 |
| C  | -2.732921000 | 2.072230000  | -2.156312000 |
| C  | -3.491885000 | 2.538939000  | -1.081302000 |
| H  | -4.340094000 | 3.190184000  | -1.259295000 |
| C  | -3.134996000 | 2.167114000  | 0.219445000  |
| H  | -3.710303000 | 2.521340000  | 1.066949000  |
| C  | -2.022232000 | 1.338953000  | 0.409057000  |
| H  | -1.707402000 | 1.040486000  | 1.401235000  |
| C  | -1.312823000 | 0.889291000  | -0.702411000 |
| H  | -0.446070000 | 0.246998000  | -0.619317000 |
| C  | -3.325970000 | 0.495667000  | -4.974414000 |
| H  | -3.792234000 | 0.777728000  | -5.926388000 |
| H  | -4.116705000 | 0.478575000  | -4.220591000 |
| C  | -2.675016000 | -0.875068000 | -5.082221000 |
| H  | -3.435848000 | -1.655881000 | -5.188019000 |

|   |              |              |              |
|---|--------------|--------------|--------------|
| H | -2.029461000 | -0.922474000 | -5.960164000 |
| C | -0.793997000 | -2.214889000 | -4.206359000 |
| H | -1.281932000 | -3.114866000 | -4.593440000 |
| H | -0.272644000 | -2.478912000 | -3.280583000 |
| C | 0.184141000  | -1.642846000 | -5.189665000 |
| C | 0.951900000  | -2.433866000 | -6.045131000 |
| H | 0.820389000  | -3.509597000 | -6.045472000 |
| C | 1.890165000  | -1.825637000 | -6.884355000 |
| H | 2.501948000  | -2.424118000 | -7.549176000 |
| C | 2.026537000  | -0.433611000 | -6.848702000 |
| H | 2.744639000  | 0.075765000  | -7.479149000 |
| C | 1.226009000  | 0.304977000  | -5.980763000 |
| H | 1.322019000  | 1.378094000  | -5.922413000 |
| C | -2.656849000 | -1.615953000 | -2.648436000 |
| H | -3.349495000 | -0.800924000 | -2.431720000 |
| H | -1.947734000 | -1.684315000 | -1.820645000 |
| C | -3.409659000 | -2.915962000 | -2.826225000 |
| C | -4.736566000 | -2.915978000 | -3.298161000 |
| H | -5.236262000 | -1.975007000 | -3.517444000 |
| C | -5.441354000 | -4.114938000 | -3.447966000 |
| H | -6.465472000 | -4.100054000 | -3.804210000 |
| C | -4.830934000 | -5.330749000 | -3.117410000 |
| H | -5.379017000 | -6.260066000 | -3.224857000 |
| C | -3.519888000 | -5.342858000 | -2.625119000 |
| H | -3.054559000 | -6.280762000 | -2.342763000 |
| C | -2.815184000 | -4.143909000 | -2.477555000 |
| H | -1.810469000 | -4.163973000 | -2.063400000 |
| O | 0.465009000  | -0.076547000 | -2.605587000 |

**$^3[\text{Fe}^{\text{IV}}(\text{O})(\text{Bntpen})]^{2+}$**

|    |              |              |              |
|----|--------------|--------------|--------------|
| Fe | -0.685048000 | 0.591604000  | -3.425625000 |
| N  | 0.200687000  | 2.414371000  | -4.008264000 |
| N  | -1.731743000 | 1.298556000  | -1.768310000 |
| N  | -2.297194000 | 1.571329000  | -4.400140000 |
| N  | -1.811394000 | -1.221260000 | -3.869594000 |
| N  | 0.393384000  | -0.324655000 | -5.179251000 |
| C  | 1.322444000  | 2.957920000  | -3.475503000 |
| H  | 1.774329000  | 2.419616000  | -2.651862000 |
| C  | 1.859778000  | 4.142097000  | -3.983007000 |
| H  | 2.756131000  | 4.560551000  | -3.542406000 |
| C  | 1.222067000  | 4.769035000  | -5.060631000 |
| H  | 1.618443000  | 5.690950000  | -5.470627000 |
| C  | 0.059413000  | 4.201488000  | -5.604186000 |
| H  | -0.452939000 | 4.676802000  | -6.432911000 |
| C  | -0.431469000 | 3.015774000  | -5.058274000 |
| C  | -1.659309000 | 2.286942000  | -5.563057000 |
| H  | -2.370376000 | 2.977622000  | -6.033260000 |
| H  | -1.379943000 | 1.534520000  | -6.307659000 |
| C  | -2.914320000 | 2.579396000  | -3.452730000 |
| H  | -3.959986000 | 2.759714000  | -3.727304000 |
| H  | -2.382487000 | 3.529016000  | -3.574626000 |
| C  | -2.778498000 | 2.132234000  | -2.022269000 |
| C  | -3.592449000 | 2.597800000  | -0.988844000 |
| H  | -4.428768000 | 3.252604000  | -1.205336000 |
| C  | -3.303523000 | 2.217732000  | 0.328378000  |
| H  | -3.922530000 | 2.571824000  | 1.144767000  |
| C  | -2.206305000 | 1.383705000  | 0.580229000  |
| H  | -1.950725000 | 1.083230000  | 1.588647000  |
| C  | -1.438404000 | 0.935805000  | -0.492503000 |
| H  | -0.579035000 | 0.289043000  | -0.367918000 |
| C  | -3.323862000 | 0.530709000  | -4.802700000 |
| H  | -3.864410000 | 0.863733000  | -5.697675000 |
| H  | -4.051195000 | 0.472259000  | -3.989297000 |
| C  | -2.682740000 | -0.830242000 | -5.040014000 |
| H  | -3.457331000 | -1.589238000 | -5.201763000 |
| H  | -2.053238000 | -0.807091000 | -5.931475000 |

|   |              |              |              |
|---|--------------|--------------|--------------|
| C | -0.799496000 | -2.249620000 | -4.277468000 |
| H | -1.295602000 | -3.124630000 | -4.711690000 |
| H | -0.286097000 | -2.575808000 | -3.366215000 |
| C | 0.209283000  | -1.670083000 | -5.232877000 |
| C | 0.958577000  | -2.477071000 | -6.093647000 |
| H | 0.780447000  | -3.545996000 | -6.122543000 |
| C | 1.938506000  | -1.892509000 | -6.900547000 |
| H | 2.535850000  | -2.502886000 | -7.567791000 |
| C | 2.136041000  | -0.508220000 | -6.831436000 |
| H | 2.887269000  | -0.017965000 | -7.438185000 |
| C | 1.347883000  | 0.242206000  | -5.962084000 |
| H | 1.479042000  | 1.310874000  | -5.877146000 |
| C | -2.616278000 | -1.711909000 | -2.654586000 |
| H | -3.290208000 | -0.899292000 | -2.375506000 |
| H | -1.882686000 | -1.827770000 | -1.852540000 |
| C | -3.393941000 | -2.992455000 | -2.866548000 |
| C | -4.729286000 | -2.953847000 | -3.311870000 |
| H | -5.219475000 | -1.997595000 | -3.480664000 |
| C | -5.453599000 | -4.135725000 | -3.499674000 |
| H | -6.484022000 | -4.091979000 | -3.834812000 |
| C | -4.853939000 | -5.372788000 | -3.234814000 |
| H | -5.416937000 | -6.289189000 | -3.372100000 |
| C | -3.533766000 | -5.423911000 | -2.770296000 |
| H | -3.075991000 | -6.379412000 | -2.539222000 |
| C | -2.809475000 | -4.242013000 | -2.585075000 |
| H | -1.796705000 | -4.293205000 | -2.194072000 |
| O | 0.476497000  | -0.064942000 | -2.461018000 |

**BnTPEN: <sup>3</sup>RC<sub>O,CHD</sub>**

|    |              |              |              |
|----|--------------|--------------|--------------|
| Fe | -0.395901000 | 0.479672000  | -3.421301000 |
| N  | 0.415933000  | 2.224134000  | -3.939476000 |
| N  | -1.200236000 | 1.232890000  | -1.741308000 |
| N  | -2.076140000 | 1.467652000  | -4.255029000 |
| N  | -1.549284000 | -1.221808000 | -3.520901000 |
| N  | 0.455598000  | -0.426273000 | -5.061539000 |
| C  | 1.554570000  | 2.736419000  | -3.415587000 |
| H  | 2.012182000  | 2.166483000  | -2.617835000 |
| C  | 2.100354000  | 3.924283000  | -3.906329000 |
| H  | 3.011480000  | 4.315963000  | -3.471581000 |
| C  | 1.456398000  | 4.587218000  | -4.956904000 |
| H  | 1.860659000  | 5.511772000  | -5.352737000 |
| C  | 0.275048000  | 4.050474000  | -5.490838000 |
| H  | -0.246682000 | 4.552844000  | -6.297416000 |
| C  | -0.227435000 | 2.860818000  | -4.965935000 |
| C  | -1.488590000 | 2.170333000  | -5.446563000 |
| H  | -2.196006000 | 2.887394000  | -5.881802000 |
| H  | -1.260565000 | 1.419707000  | -6.210340000 |
| C  | -2.596273000 | 2.488506000  | -3.270127000 |
| H  | -3.674746000 | 2.628655000  | -3.404022000 |
| H  | -2.124214000 | 3.452632000  | -3.486213000 |
| C  | -2.253519000 | 2.085062000  | -1.864610000 |
| C  | -2.906169000 | 2.598259000  | -0.742617000 |
| H  | -3.750561000 | 3.266954000  | -0.865613000 |
| C  | -2.449570000 | 2.247039000  | 0.532755000  |
| H  | -2.941535000 | 2.637131000  | 1.416264000  |
| C  | -1.350067000 | 1.389228000  | 0.648088000  |
| H  | -0.963419000 | 1.097775000  | 1.616503000  |
| C  | -0.746327000 | 0.893247000  | -0.506079000 |
| H  | 0.096385000  | 0.213979000  | -0.467246000 |
| C  | -3.131215000 | 0.427397000  | -4.550317000 |
| H  | -3.682492000 | 0.682613000  | -5.463799000 |
| H  | -3.846265000 | 0.453338000  | -3.724660000 |
| C  | -2.514811000 | -0.958511000 | -4.666682000 |
| H  | -3.296159000 | -1.725946000 | -4.667332000 |
| H  | -1.957619000 | -1.051433000 | -5.599887000 |
| C  | -0.577013000 | -2.301516000 | -3.924381000 |

|   |              |              |              |
|---|--------------|--------------|--------------|
| H | -1.114164000 | -3.203887000 | -4.234004000 |
| H | 0.023011000  | -2.544617000 | -3.039691000 |
| C | 0.308676000  | -1.782407000 | -5.018137000 |
| C | 0.975836000  | -2.616813000 | -5.916240000 |
| H | 0.828514000  | -3.689208000 | -5.863941000 |
| C | 1.832856000  | -2.056220000 | -6.867823000 |
| H | 2.364775000  | -2.689024000 | -7.568623000 |
| C | 1.992488000  | -0.666400000 | -6.898316000 |
| H | 2.650533000  | -0.192862000 | -7.616185000 |
| C | 1.293357000  | 0.116610000  | -5.983100000 |
| H | 1.409655000  | 1.189391000  | -5.974095000 |
| C | -2.270995000 | -1.616964000 | -2.219946000 |
| H | -2.868499000 | -0.753309000 | -1.925005000 |
| H | -1.474876000 | -1.748542000 | -1.483149000 |
| C | -3.140784000 | -2.852031000 | -2.310970000 |
| C | -4.520776000 | -2.734796000 | -2.565988000 |
| H | -4.970525000 | -1.750940000 | -2.681361000 |
| C | -5.334546000 | -3.870642000 | -2.633062000 |
| H | -6.397386000 | -3.765188000 | -2.820993000 |
| C | -4.779031000 | -5.140955000 | -2.438934000 |
| H | -5.409641000 | -6.021858000 | -2.483672000 |
| C | -3.411737000 | -5.270067000 | -2.164855000 |
| H | -2.984474000 | -6.251203000 | -1.988598000 |
| C | -2.598567000 | -4.133976000 | -2.097328000 |
| H | -1.547201000 | -4.239795000 | -1.846424000 |
| O | 0.871412000  | -0.113460000 | -2.539618000 |
| H | 2.645181000  | -1.543547000 | -1.208339000 |
| C | 2.901843000  | -2.117942000 | -0.300581000 |
| H | 3.969135000  | -1.948582000 | -0.121344000 |
| C | 2.645613000  | -3.622726000 | -0.548549000 |
| C | 2.079233000  | -1.586076000 | 0.856269000  |
| H | 2.471856000  | -0.749596000 | 1.429420000  |
| C | 0.879081000  | -2.129840000 | 1.155015000  |
| C | 1.179832000  | -3.983998000 | -0.421568000 |
| C | 0.366262000  | -3.281379000 | 0.398948000  |
| H | -0.657866000 | -3.601821000 | 0.573687000  |
| H | 0.286154000  | -1.755807000 | 1.985911000  |
| H | 0.831481000  | -4.895195000 | -0.903904000 |
| H | 3.207070000  | -4.222244000 | 0.187761000  |
| H | 3.040120000  | -3.911521000 | -1.529870000 |

**BnTPEN: <sup>3</sup>TS1<sub>o,CHD</sub>**

|    |              |              |              |
|----|--------------|--------------|--------------|
| Fe | -0.811248000 | 0.211437000  | -3.071321000 |
| N  | 0.223102000  | 1.913127000  | -3.222529000 |
| N  | -2.058977000 | 0.948012000  | -1.668700000 |
| N  | -2.098477000 | 1.360481000  | -4.311979000 |
| N  | -1.982896000 | -1.397474000 | -3.652829000 |
| N  | 0.464005000  | -0.692019000 | -4.415689000 |
| C  | 1.169243000  | 2.326520000  | -2.346681000 |
| H  | 1.325086000  | 1.692650000  | -1.484199000 |
| C  | 1.896965000  | 3.497201000  | -2.571734000 |
| H  | 2.646230000  | 3.810099000  | -1.855375000 |
| C  | 1.640573000  | 4.248902000  | -3.723521000 |
| H  | 2.190710000  | 5.162391000  | -3.918019000 |
| C  | 0.653414000  | 3.817257000  | -4.621624000 |
| H  | 0.426764000  | 4.390680000  | -5.513248000 |
| C  | -0.044030000 | 2.641162000  | -4.348973000 |
| C  | -1.140591000 | 2.069546000  | -5.224386000 |
| H  | -1.639177000 | 2.857541000  | -5.803714000 |
| H  | -0.737750000 | 1.338777000  | -5.933511000 |
| C  | -2.839103000 | 2.367695000  | -3.466383000 |
| H  | -3.811674000 | 2.600589000  | -3.915030000 |
| H  | -2.266286000 | 3.301127000  | -3.456772000 |
| C  | -2.977330000 | 1.873068000  | -2.054073000 |
| C  | -3.922398000 | 2.378746000  | -1.158913000 |

|   |              |              |              |
|---|--------------|--------------|--------------|
| H | -4.652119000 | 3.107316000  | -1.493750000 |
| C | -3.904309000 | 1.941510000  | 0.170001000  |
| H | -4.628589000 | 2.322003000  | 0.880978000  |
| C | -2.935114000 | 1.012383000  | 0.566223000  |
| H | -2.883462000 | 0.660084000  | 1.588961000  |
| C | -2.027929000 | 0.532211000  | -0.376648000 |
| H | -1.248960000 | -0.183172000 | -0.147767000 |
| C | -3.069091000 | 0.420228000  | -4.984914000 |
| H | -3.301935000 | 0.763886000  | -6.000707000 |
| H | -3.999471000 | 0.456800000  | -4.413021000 |
| C | -2.528150000 | -1.001757000 | -5.012980000 |
| H | -3.311484000 | -1.704684000 | -5.317671000 |
| H | -1.714314000 | -1.083531000 | -5.735317000 |
| C | -1.001185000 | -2.525233000 | -3.812999000 |
| H | -1.461729000 | -3.375793000 | -4.326258000 |
| H | -0.715233000 | -2.842022000 | -2.805211000 |
| C | 0.209398000  | -2.026168000 | -4.546420000 |
| C | 1.041213000  | -2.862758000 | -5.293898000 |
| H | 0.799819000  | -3.915083000 | -5.389617000 |
| C | 2.175066000  | -2.328169000 | -5.913025000 |
| H | 2.832274000  | -2.961125000 | -6.497987000 |
| C | 2.441215000  | -0.962057000 | -5.768114000 |
| H | 3.307136000  | -0.507305000 | -6.233458000 |
| C | 1.569571000  | -0.177415000 | -5.014741000 |
| H | 1.755374000  | 0.876999000  | -4.877685000 |
| C | -3.090549000 | -1.790514000 | -2.665382000 |
| H | -3.727813000 | -0.912448000 | -2.549586000 |
| H | -2.577156000 | -1.955380000 | -1.715484000 |
| C | -3.917647000 | -2.997173000 | -3.053490000 |
| C | -5.115586000 | -2.841804000 | -3.776870000 |
| H | -5.463790000 | -1.846287000 | -4.042778000 |
| C | -5.890827000 | -3.953088000 | -4.124795000 |
| H | -6.815309000 | -3.817277000 | -4.675233000 |
| C | -5.482765000 | -5.237007000 | -3.744521000 |
| H | -6.086737000 | -6.098651000 | -4.006188000 |
| C | -4.305135000 | -5.404185000 | -3.005414000 |
| H | -4.000577000 | -6.395022000 | -2.686540000 |
| C | -3.530631000 | -4.292224000 | -2.659493000 |
| H | -2.637037000 | -4.431511000 | -2.056635000 |
| O | 0.082238000  | -0.558056000 | -1.781970000 |
| H | 1.443509000  | -1.096843000 | -1.752179000 |
| C | 2.460939000  | -1.695064000 | -1.453517000 |
| H | 2.405774000  | -2.579670000 | -2.097854000 |
| C | 2.279711000  | -2.041520000 | 0.032727000  |
| C | 3.605292000  | -0.831212000 | -1.758143000 |
| H | 3.982582000  | -0.803850000 | -2.776893000 |
| C | 4.165869000  | -0.025256000 | -0.800859000 |
| C | 2.783750000  | -0.978735000 | 0.968839000  |
| C | 3.684322000  | -0.043162000 | 0.565077000  |
| H | 4.088422000  | 0.673833000  | 1.272207000  |
| H | 4.997918000  | 0.625442000  | -1.052127000 |
| H | 2.464239000  | -1.023555000 | 2.006205000  |
| H | 2.829043000  | -2.975994000 | 0.257353000  |
| H | 1.227693000  | -2.273024000 | 0.242298000  |

**BnTPEN: <sup>3</sup>IR1<sub>o,CHD</sub>**

|    |              |              |              |
|----|--------------|--------------|--------------|
| Fe | -0.859668000 | 0.137818000  | -3.028546000 |
| N  | 0.225377000  | 1.807838000  | -3.075872000 |
| N  | -2.108385000 | 0.807626000  | -1.611705000 |
| N  | -2.074074000 | 1.356847000  | -4.218806000 |
| N  | -2.036841000 | -1.421773000 | -3.718681000 |
| N  | 0.446916000  | -0.729055000 | -4.370215000 |
| C  | 1.164152000  | 2.148833000  | -2.161556000 |
| H  | 1.297142000  | 1.472060000  | -1.327914000 |
| C  | 1.924885000  | 3.310564000  | -2.315259000 |
| H  | 2.670234000  | 3.561495000  | -1.571374000 |

|   |              |              |              |
|---|--------------|--------------|--------------|
| C | 1.709734000  | 4.127217000  | -3.429943000 |
| H | 2.286623000  | 5.034620000  | -3.566828000 |
| C | 0.729980000  | 3.767925000  | -4.368773000 |
| H | 0.535740000  | 4.391327000  | -5.234051000 |
| C | -0.000267000 | 2.598268000  | -4.169884000 |
| C | -1.091695000 | 2.092785000  | -5.088179000 |
| H | -1.573994000 | 2.914441000  | -5.632223000 |
| H | -0.694402000 | 1.389102000  | -5.827071000 |
| C | -2.809432000 | 2.343496000  | -3.337613000 |
| H | -3.760413000 | 2.627824000  | -3.801651000 |
| H | -2.207965000 | 3.255401000  | -3.263413000 |
| C | -2.997979000 | 1.774551000  | -1.960401000 |
| C | -3.949917000 | 2.247664000  | -1.056274000 |
| H | -4.656709000 | 3.011699000  | -1.359553000 |
| C | -3.966971000 | 1.730504000  | 0.244584000  |
| H | -4.696913000 | 2.084449000  | 0.963448000  |
| C | -3.026418000 | 0.758031000  | 0.603382000  |
| H | -3.003388000 | 0.345264000  | 1.604281000  |
| C | -2.109535000 | 0.312439000  | -0.348129000 |
| H | -1.348709000 | -0.430710000 | -0.149570000 |
| C | -3.061223000 | 0.481250000  | -4.959179000 |
| H | -3.272997000 | 0.895556000  | -5.952473000 |
| H | -3.995898000 | 0.503541000  | -4.393743000 |
| C | -2.547427000 | -0.945578000 | -5.065628000 |
| H | -3.337949000 | -1.615643000 | -5.421142000 |
| H | -1.721120000 | -1.002761000 | -5.776445000 |
| C | -1.074136000 | -2.560549000 | -3.914068000 |
| H | -1.538230000 | -3.370308000 | -4.486076000 |
| H | -0.826399000 | -2.940322000 | -2.917986000 |
| C | 0.166489000  | -2.048690000 | -4.585967000 |
| C | 0.999855000  | -2.859789000 | -5.358262000 |
| H | 0.739000000  | -3.899300000 | -5.519716000 |
| C | 2.162568000  | -2.317484000 | -5.914514000 |
| H | 2.822051000  | -2.931588000 | -6.516744000 |
| C | 2.455881000  | -0.969412000 | -5.681896000 |
| H | 3.347161000  | -0.510753000 | -6.091917000 |
| C | 1.582588000  | -0.208188000 | -4.907574000 |
| H | 1.792408000  | 0.829816000  | -4.701004000 |
| C | -3.171980000 | -1.842902000 | -2.771469000 |
| H | -3.801481000 | -0.962901000 | -2.631412000 |
| H | -2.680363000 | -2.056519000 | -1.819909000 |
| C | -4.002736000 | -3.020650000 | -3.232054000 |
| C | -5.176615000 | -2.819310000 | -3.983438000 |
| H | -5.504515000 | -1.809413000 | -4.219391000 |
| C | -5.956233000 | -3.904953000 | -4.396187000 |
| H | -6.862431000 | -3.734799000 | -4.967061000 |
| C | -5.577021000 | -5.208355000 | -4.053942000 |
| H | -6.184967000 | -6.050182000 | -4.365993000 |
| C | -4.424320000 | -5.421474000 | -3.287789000 |
| H | -4.143321000 | -6.428108000 | -2.998316000 |
| C | -3.644865000 | -4.335310000 | -2.877118000 |
| H | -2.771639000 | -4.510674000 | -2.254180000 |
| O | 0.022446000  | -0.750933000 | -1.721299000 |
| H | 0.941507000  | -1.073518000 | -1.866053000 |
| C | 2.810386000  | -2.048495000 | -0.737434000 |
| H | 2.433318000  | -3.060078000 | -0.865789000 |
| C | 2.581909000  | -1.385614000 | 0.597574000  |
| C | 3.561995000  | -1.454874000 | -1.725550000 |
| H | 3.758922000  | -1.996599000 | -2.647412000 |
| C | 4.136098000  | -0.163822000 | -1.549389000 |
| C | 3.189808000  | -0.010335000 | 0.695037000  |
| C | 3.932652000  | 0.533022000  | -0.324096000 |
| H | 4.404268000  | 1.502397000  | -0.184823000 |
| H | 4.767613000  | 0.262175000  | -2.321268000 |
| H | 3.070484000  | 0.524174000  | 1.633141000  |
| H | 2.993735000  | -2.026913000 | 1.401436000  |
| H | 1.501509000  | -1.347959000 | 0.829841000  |

**BnTPEN: <sup>3</sup>Prdo,CHD**

|    |              |              |              |
|----|--------------|--------------|--------------|
| Fe | -0.650850000 | 0.159663000  | -3.103895000 |
| N  | 0.205712000  | 2.116721000  | -3.441485000 |
| N  | -1.817226000 | 0.707049000  | -1.545305000 |
| N  | -2.293423000 | 1.375457000  | -4.160311000 |
| N  | -1.912902000 | -1.500620000 | -3.780061000 |
| N  | 0.520562000  | -0.626842000 | -4.589791000 |
| C  | 1.253329000  | 2.649359000  | -2.763285000 |
| H  | 1.646740000  | 2.055146000  | -1.948354000 |
| C  | 1.803489000  | 3.886175000  | -3.101885000 |
| H  | 2.637000000  | 4.283035000  | -2.535377000 |
| C  | 1.255991000  | 4.597014000  | -4.176569000 |
| H  | 1.660602000  | 5.560831000  | -4.463435000 |
| C  | 0.167157000  | 4.053410000  | -4.868623000 |
| H  | -0.287861000 | 4.590323000  | -5.693431000 |
| C  | -0.340512000 | 2.810596000  | -4.480382000 |
| C  | -1.527661000 | 2.160425000  | -5.163496000 |
| H  | -2.149294000 | 2.924787000  | -5.653256000 |
| H  | -1.185649000 | 1.470229000  | -5.943757000 |
| C  | -2.900551000 | 2.247539000  | -3.114824000 |
| H  | -3.943432000 | 2.492822000  | -3.357452000 |
| H  | -2.357092000 | 3.198525000  | -3.093671000 |
| C  | -2.813525000 | 1.615803000  | -1.748014000 |
| C  | -3.691636000 | 1.973952000  | -0.719665000 |
| H  | -4.479645000 | 2.692522000  | -0.914969000 |
| C  | -3.547071000 | 1.402918000  | 0.546991000  |
| H  | -4.219635000 | 1.673564000  | 1.352594000  |
| C  | -2.526340000 | 0.467000000  | 0.751097000  |
| H  | -2.386929000 | -0.010359000 | 1.713163000  |
| C  | -1.690689000 | 0.141256000  | -0.313272000 |
| H  | -0.913322000 | -0.601742000 | -0.201450000 |
| C  | -3.267141000 | 0.395484000  | -4.728352000 |
| H  | -3.720277000 | 0.776699000  | -5.654694000 |
| H  | -4.079422000 | 0.281900000  | -4.005199000 |
| C  | -2.617020000 | -0.958994000 | -5.000179000 |
| H  | -3.374916000 | -1.673205000 | -5.344753000 |
| H  | -1.873843000 | -0.863537000 | -5.796066000 |
| C  | -0.922726000 | -2.549213000 | -4.186942000 |
| H  | -1.392718000 | -3.335650000 | -4.789317000 |
| H  | -0.554592000 | -3.023251000 | -3.268658000 |
| C  | 0.224586000  | -1.918710000 | -4.928550000 |
| C  | 0.967222000  | -2.614425000 | -5.886030000 |
| H  | 0.694720000  | -3.632348000 | -6.139826000 |
| C  | 2.051961000  | -1.988355000 | -6.507179000 |
| H  | 2.638000000  | -2.514205000 | -7.251990000 |
| C  | 2.361312000  | -0.670225000 | -6.153469000 |
| H  | 3.192065000  | -0.147161000 | -6.611020000 |
| C  | 1.578745000  | -0.022693000 | -5.199712000 |
| H  | 1.788033000  | 0.994426000  | -4.905698000 |
| C  | -2.888850000 | -2.055170000 | -2.740910000 |
| H  | -3.517087000 | -1.218475000 | -2.429592000 |
| H  | -2.273641000 | -2.338920000 | -1.881498000 |
| C  | -3.745576000 | -3.222065000 | -3.187849000 |
| C  | -5.027646000 | -3.003438000 | -3.726686000 |
| H  | -5.419478000 | -1.991815000 | -3.802079000 |
| C  | -5.824961000 | -4.077696000 | -4.135818000 |
| H  | -6.813551000 | -3.893826000 | -4.542121000 |
| C  | -5.353454000 | -5.389055000 | -4.004128000 |
| H  | -5.973196000 | -6.223078000 | -4.314034000 |
| C  | -4.088349000 | -5.622412000 | -3.451106000 |
| H  | -3.730328000 | -6.638363000 | -3.324720000 |
| C  | -3.292642000 | -4.546967000 | -3.043010000 |
| H  | -2.326650000 | -4.743541000 | -2.584624000 |
| O  | 0.925303000  | -0.568658000 | -1.826774000 |
| H  | 1.713329000  | -0.982336000 | -2.225378000 |



|   |             |              |              |
|---|-------------|--------------|--------------|
| C | 2.148180000 | -1.351294000 | 1.156151000  |
| H | 1.391349000 | -1.668595000 | 1.866881000  |
| C | 2.496120000 | 0.007608000  | 1.059022000  |
| C | 2.823968000 | -2.306320000 | 0.379754000  |
| H | 2.579498000 | -3.358566000 | 0.481185000  |
| C | 3.842563000 | -1.903283000 | -0.496404000 |
| C | 3.523007000 | 0.407978000  | 0.187316000  |
| C | 4.192979000 | -0.546712000 | -0.591678000 |
| H | 5.009243000 | -0.242608000 | -1.238998000 |
| H | 4.389115000 | -2.645450000 | -1.069413000 |
| H | 3.824986000 | 1.449865000  | 0.148620000  |
| H | 2.009060000 | 0.739723000  | 1.695771000  |
| H | 1.111287000 | -0.414202000 | -0.874536000 |

**BnTPEN: <sup>3</sup>RC<sub>o,DMS</sub>**

|    |              |              |              |
|----|--------------|--------------|--------------|
| Fe | -0.372151000 | 0.300644000  | -3.083108000 |
| N  | 0.612269000  | 2.005086000  | -3.345974000 |
| N  | -1.533006000 | 1.081165000  | -1.630503000 |
| N  | -1.768812000 | 1.365550000  | -4.274861000 |
| N  | -1.533126000 | -1.350713000 | -3.507809000 |
| N  | 0.823900000  | -0.617988000 | -4.475914000 |
| C  | 1.625834000  | 2.443048000  | -2.561675000 |
| H  | 1.898006000  | 1.818035000  | -1.720380000 |
| C  | 2.313285000  | 3.618961000  | -2.874223000 |
| H  | 3.122096000  | 3.948370000  | -2.234234000 |
| C  | 1.948437000  | 4.343150000  | -4.013129000 |
| H  | 2.466112000  | 5.259751000  | -4.271604000 |
| C  | 0.901784000  | 3.874699000  | -4.823151000 |
| H  | 0.600445000  | 4.419939000  | -5.710306000 |
| C  | 0.249034000  | 2.695338000  | -4.471623000 |
| C  | -0.879247000 | 2.066536000  | -5.264363000 |
| H  | -1.432042000 | 2.819008000  | -5.840705000 |
| H  | -0.495197000 | 1.321594000  | -5.969021000 |
| C  | -2.484632000 | 2.390750000  | -3.427947000 |
| H  | -3.494136000 | 2.566082000  | -3.816058000 |
| H  | -1.947823000 | 3.342161000  | -3.505476000 |
| C  | -2.501579000 | 1.965425000  | -1.988239000 |
| C  | -3.384154000 | 2.496921000  | -1.045514000 |
| H  | -4.155694000 | 3.191592000  | -1.357532000 |
| C  | -3.248858000 | 2.132469000  | 0.298244000  |
| H  | -3.922485000 | 2.535787000  | 1.045407000  |
| C  | -2.227506000 | 1.246805000  | 0.662452000  |
| H  | -2.082599000 | 0.951758000  | 1.694220000  |
| C  | -1.387478000 | 0.735778000  | -0.324193000 |
| H  | -0.580885000 | 0.049212000  | -0.104915000 |
| C  | -2.752206000 | 0.374979000  | -4.853873000 |
| H  | -3.043910000 | 0.668164000  | -5.869913000 |
| H  | -3.652440000 | 0.417586000  | -4.235770000 |
| C  | -2.177202000 | -1.033512000 | -4.848139000 |
| H  | -2.958768000 | -1.770847000 | -5.061049000 |
| H  | -1.409642000 | -1.133932000 | -5.616754000 |
| C  | -0.533945000 | -2.463957000 | -3.688860000 |
| H  | -1.010437000 | -3.340173000 | -4.139653000 |
| H  | -0.175897000 | -2.742360000 | -2.692722000 |
| C  | 0.616032000  | -1.966072000 | -4.514036000 |
| C  | 1.452745000  | -2.813626000 | -5.239638000 |
| H  | 1.253115000  | -3.878634000 | -5.259733000 |
| C  | 2.547024000  | -2.275517000 | -5.923737000 |
| H  | 3.213467000  | -2.918939000 | -6.486088000 |
| C  | 2.768686000  | -0.896217000 | -5.864583000 |
| H  | 3.610415000  | -0.441034000 | -6.371114000 |
| C  | 1.893559000  | -0.098331000 | -5.131702000 |
| H  | 2.053760000  | 0.965308000  | -5.052428000 |
| C  | -2.565065000 | -1.725490000 | -2.431206000 |
| H  | -3.227601000 | -0.864751000 | -2.326173000 |
| H  | -1.990033000 | -1.820557000 | -1.507347000 |

|   |              |              |              |
|---|--------------|--------------|--------------|
| C | -3.364313000 | -2.981280000 | -2.701301000 |
| C | -4.607854000 | -2.912949000 | -3.358803000 |
| H | -5.011972000 | -1.949046000 | -3.660088000 |
| C | -5.356529000 | -4.071234000 | -3.592716000 |
| H | -6.316655000 | -4.003491000 | -4.092265000 |
| C | -4.875339000 | -5.313779000 | -3.163249000 |
| H | -5.458639000 | -6.211153000 | -3.336675000 |
| C | -3.650434000 | -5.393019000 | -2.488845000 |
| H | -3.288041000 | -6.350762000 | -2.131920000 |
| C | -2.902361000 | -4.234698000 | -2.256298000 |
| H | -1.970220000 | -4.304637000 | -1.701817000 |
| O | 0.585008000  | -0.382909000 | -1.920247000 |
| S | 3.911788000  | -0.306680000 | -1.441938000 |
| C | 5.757336000  | -0.215800000 | -1.038399000 |
| H | 6.206020000  | -1.205120000 | -1.138293000 |
| H | 5.899202000  | 0.169462000  | -0.027601000 |
| H | 6.205356000  | 0.467142000  | -1.761088000 |
| C | 3.358826000  | -1.497320000 | -0.081439000 |
| H | 3.557400000  | -1.060016000 | 0.898484000  |
| H | 2.286701000  | -1.646973000 | -0.218022000 |
| H | 3.886887000  | -2.446503000 | -0.186414000 |

**BnTPEN: <sup>3</sup>TS1<sub>O,DMS</sub>**

|    |              |              |              |
|----|--------------|--------------|--------------|
| Fe | -0.182583000 | 0.548185000  | -2.932912000 |
| N  | 0.516694000  | 2.664030000  | -3.532275000 |
| N  | -1.496830000 | 1.178998000  | -1.500590000 |
| N  | -1.784897000 | 1.448820000  | -4.181053000 |
| N  | -1.352980000 | -1.364698000 | -3.590147000 |
| N  | 1.037192000  | -0.265411000 | -4.361907000 |
| C  | 1.435622000  | 3.438806000  | -2.907682000 |
| H  | 1.817173000  | 3.059739000  | -1.967704000 |
| C  | 1.861556000  | 4.657605000  | -3.440061000 |
| H  | 2.594361000  | 5.256422000  | -2.912923000 |
| C  | 1.316210000  | 5.088717000  | -4.655839000 |
| H  | 1.624901000  | 6.030959000  | -5.093924000 |
| C  | 0.350079000  | 4.298087000  | -5.291563000 |
| H  | -0.105560000 | 4.621270000  | -6.221055000 |
| C  | -0.030260000 | 3.089235000  | -4.702420000 |
| C  | -1.086424000 | 2.176905000  | -5.290470000 |
| H  | -1.802808000 | 2.755410000  | -5.890590000 |
| H  | -0.633369000 | 1.429516000  | -5.950822000 |
| C  | -2.530682000 | 2.424881000  | -3.309633000 |
| H  | -3.545123000 | 2.586857000  | -3.694750000 |
| H  | -2.017397000 | 3.389942000  | -3.348552000 |
| C  | -2.551136000 | 1.951268000  | -1.885736000 |
| C  | -3.543477000 | 2.331455000  | -0.978704000 |
| H  | -4.375830000 | 2.939332000  | -1.314490000 |
| C  | -3.444589000 | 1.929125000  | 0.356932000  |
| H  | -4.204658000 | 2.216656000  | 1.074118000  |
| C  | -2.348694000 | 1.152549000  | 0.749411000  |
| H  | -2.232810000 | 0.825888000  | 1.775420000  |
| C  | -1.397377000 | 0.793364000  | -0.202851000 |
| H  | -0.525948000 | 0.198945000  | 0.032743000  |
| C  | -2.729801000 | 0.385819000  | -4.679256000 |
| H  | -3.195756000 | 0.703978000  | -5.621603000 |
| H  | -3.530030000 | 0.296098000  | -3.940276000 |
| C  | -2.041316000 | -0.960236000 | -4.855302000 |
| H  | -2.776691000 | -1.715084000 | -5.163208000 |
| H  | -1.291479000 | -0.900917000 | -5.648922000 |
| C  | -0.234830000 | -2.303381000 | -3.865753000 |
| H  | -0.562536000 | -3.188425000 | -4.426796000 |
| H  | 0.137648000  | -2.659104000 | -2.897400000 |
| C  | 0.879619000  | -1.601560000 | -4.598757000 |
| C  | 1.740480000  | -2.292211000 | -5.457097000 |
| H  | 1.576952000  | -3.348179000 | -5.639145000 |
| C  | 2.799052000  | -1.617293000 | -6.070492000 |

|   |              |              |              |
|---|--------------|--------------|--------------|
| H | 3.473643000  | -2.142136000 | -6.737074000 |
| C | 2.967329000  | -0.252321000 | -5.811244000 |
| H | 3.774247000  | 0.310204000  | -6.264591000 |
| C | 2.072540000  | 0.387903000  | -4.957557000 |
| H | 2.170273000  | 1.438054000  | -4.730954000 |
| C | -2.298994000 | -1.905749000 | -2.531683000 |
| H | -3.015364000 | -1.109821000 | -2.314248000 |
| H | -1.689482000 | -2.043871000 | -1.633122000 |
| C | -3.028635000 | -3.186141000 | -2.887134000 |
| C | -4.307057000 | -3.143310000 | -3.474374000 |
| H | -4.792854000 | -2.185444000 | -3.645434000 |
| C | -4.981591000 | -4.322793000 | -3.808402000 |
| H | -5.969754000 | -4.273815000 | -4.252779000 |
| C | -4.388521000 | -5.564552000 | -3.552699000 |
| H | -4.913261000 | -6.479521000 | -3.804204000 |
| C | -3.124959000 | -5.622583000 | -2.951923000 |
| H | -2.673238000 | -6.583509000 | -2.730450000 |
| C | -2.452600000 | -4.442076000 | -2.619648000 |
| H | -1.486465000 | -4.500790000 | -2.124431000 |
| O | 0.879625000  | 0.073132000  | -1.608583000 |
| S | 2.731316000  | -0.880697000 | -1.574679000 |
| C | 2.324636000  | -1.899373000 | -0.044645000 |
| H | 1.766873000  | -1.268746000 | 0.647244000  |
| H | 3.258385000  | -2.250835000 | 0.396945000  |
| H | 1.720742000  | -2.743658000 | -0.374395000 |
| C | 3.646400000  | 0.558744000  | -0.777677000 |
| H | 4.518954000  | 0.170981000  | -0.249576000 |
| H | 3.956988000  | 1.221950000  | -1.584014000 |
| H | 2.954765000  | 1.059055000  | -0.099426000 |

**BnTPEN: <sup>3</sup>DMS-Prdo,<sub>DMS</sub>**

|    |              |              |              |
|----|--------------|--------------|--------------|
| Fe | -0.395228000 | -0.141087000 | -2.925671000 |
| N  | -2.474161000 | -0.570260000 | -2.492749000 |
| N  | -0.138797000 | -1.811365000 | -4.041555000 |
| N  | -1.574217000 | 0.386012000  | -4.850528000 |
| N  | 1.100098000  | 1.146227000  | -3.967391000 |
| N  | -0.482138000 | 1.565543000  | -1.801717000 |
| C  | -2.910105000 | -1.434922000 | -1.543661000 |
| H  | -2.141281000 | -1.988880000 | -1.019480000 |
| C  | -4.266693000 | -1.608312000 | -1.266433000 |
| H  | -4.581478000 | -2.313381000 | -0.506694000 |
| C  | -5.203282000 | -0.864614000 | -1.994842000 |
| H  | -6.264436000 | -0.976797000 | -1.804191000 |
| C  | -4.753562000 | 0.010549000  | -2.991036000 |
| H  | -5.458642000 | 0.577356000  | -3.588787000 |
| C  | -3.380901000 | 0.136666000  | -3.223501000 |
| C  | -2.806132000 | 1.022588000  | -4.312503000 |
| H  | -3.559724000 | 1.194406000  | -5.095960000 |
| H  | -2.532427000 | 2.002833000  | -3.905338000 |
| C  | -1.867520000 | -0.910840000 | -5.526359000 |
| H  | -1.973954000 | -0.778484000 | -6.611445000 |
| H  | -2.832408000 | -1.283093000 | -5.165342000 |
| C  | -0.816637000 | -1.946046000 | -5.217363000 |
| C  | -0.595120000 | -3.035366000 | -6.065265000 |
| H  | -1.141377000 | -3.106995000 | -6.999076000 |
| C  | 0.321412000  | -4.024263000 | -5.697447000 |
| H  | 0.501917000  | -4.874738000 | -6.344688000 |
| C  | 0.997624000  | -3.894114000 | -4.479664000 |
| H  | 1.711438000  | -4.640395000 | -4.153105000 |
| C  | 0.747942000  | -2.779498000 | -3.682477000 |
| H  | 1.234924000  | -2.623728000 | -2.729994000 |
| C  | -0.717421000 | 1.273785000  | -5.691532000 |
| H  | -1.327403000 | 1.974635000  | -6.279818000 |
| H  | -0.191874000 | 0.636905000  | -6.408193000 |
| C  | 0.290729000  | 2.053716000  | -4.853570000 |
| H  | 0.950915000  | 2.634374000  | -5.510180000 |

|   |              |              |              |
|---|--------------|--------------|--------------|
| H | -0.233296000 | 2.763771000  | -4.208760000 |
| C | 1.693419000  | 1.928732000  | -2.841549000 |
| H | 2.279969000  | 2.783625000  | -3.200302000 |
| H | 2.387006000  | 1.261553000  | -2.315530000 |
| C | 0.611465000  | 2.380202000  | -1.897061000 |
| C | 0.725137000  | 3.547330000  | -1.136858000 |
| H | 1.598462000  | 4.178823000  | -1.253377000 |
| C | -0.290787000 | 3.889679000  | -0.239704000 |
| H | -0.218678000 | 4.792585000  | 0.355560000  |
| C | -1.404529000 | 3.049147000  | -0.133287000 |
| H | -2.216956000 | 3.278324000  | 0.545560000  |
| C | -1.467997000 | 1.905156000  | -0.926538000 |
| H | -2.315387000 | 1.238321000  | -0.875246000 |
| C | 2.171661000  | 0.373030000  | -4.727541000 |
| H | 1.647545000  | -0.242979000 | -5.460725000 |
| H | 2.618466000  | -0.307590000 | -3.996109000 |
| C | 3.240546000  | 1.206923000  | -5.405424000 |
| C | 3.097748000  | 1.598693000  | -6.749768000 |
| H | 2.226965000  | 1.279310000  | -7.317432000 |
| C | 4.082256000  | 2.366914000  | -7.380562000 |
| H | 3.961173000  | 2.654555000  | -8.419254000 |
| C | 5.230206000  | 2.748684000  | -6.676537000 |
| H | 5.997546000  | 3.337762000  | -7.166382000 |
| C | 5.394906000  | 2.349964000  | -5.344448000 |
| H | 6.294373000  | 2.623611000  | -4.803532000 |
| C | 4.408726000  | 1.582482000  | -4.716173000 |
| H | 4.563734000  | 1.251864000  | -3.692021000 |
| O | 0.634711000  | -1.108721000 | -1.405125000 |
| S | 1.187630000  | -0.556514000 | 0.155803000  |
| C | 0.128258000  | -1.566318000 | 1.353356000  |
| H | 0.556339000  | -1.456114000 | 2.351157000  |
| H | 0.137348000  | -2.604370000 | 1.019904000  |
| H | -0.874753000 | -1.143820000 | 1.316702000  |
| C | 2.816138000  | -1.505882000 | 0.306862000  |
| H | 2.614954000  | -2.558227000 | 0.106669000  |
| H | 3.491977000  | -1.085784000 | -0.436595000 |
| H | 3.202960000  | -1.349144000 | 1.314978000  |

**BnTPEN: <sup>5</sup>DMS-PrdCHD<sub>o,DMS</sub>**

|    |              |              |              |
|----|--------------|--------------|--------------|
| Fe | -0.508509000 | 0.754023000  | -2.952334000 |
| N  | 0.197464000  | 2.754066000  | -3.575290000 |
| N  | -1.872713000 | 1.450369000  | -1.371466000 |
| N  | -2.250287000 | 1.707918000  | -4.120269000 |
| N  | -1.568531000 | -1.128913000 | -3.634779000 |
| N  | 0.853990000  | -0.138188000 | -4.569082000 |
| C  | 1.205566000  | 3.453407000  | -2.996491000 |
| H  | 1.644470000  | 3.012903000  | -2.109497000 |
| C  | 1.644911000  | 4.675977000  | -3.503517000 |
| H  | 2.448696000  | 5.212217000  | -3.014100000 |
| C  | 1.018426000  | 5.194518000  | -4.644022000 |
| H  | 1.333931000  | 6.144074000  | -5.061071000 |
| C  | -0.035665000 | 4.482992000  | -5.229026000 |
| H  | -0.552402000 | 4.874856000  | -6.097850000 |
| C  | -0.429324000 | 3.262219000  | -4.672521000 |
| C  | -1.572071000 | 2.436725000  | -5.229472000 |
| H  | -2.270928000 | 3.080573000  | -5.783871000 |
| H  | -1.186026000 | 1.692484000  | -5.935295000 |
| C  | -2.970088000 | 2.647444000  | -3.205549000 |
| H  | -4.002604000 | 2.810034000  | -3.543946000 |
| H  | -2.467996000 | 3.620218000  | -3.254191000 |
| C  | -2.950395000 | 2.179641000  | -1.767633000 |
| C  | -3.952066000 | 2.548650000  | -0.864068000 |
| H  | -4.807110000 | 3.121018000  | -1.206292000 |
| C  | -3.832823000 | 2.179101000  | 0.479755000  |
| H  | -4.599018000 | 2.458400000  | 1.193954000  |
| C  | -2.711586000 | 1.446346000  | 0.886911000  |

|   |              |              |              |
|---|--------------|--------------|--------------|
| H | -2.583830000 | 1.148382000  | 1.920407000  |
| C | -1.754923000 | 1.096854000  | -0.064812000 |
| H | -0.868379000 | 0.527771000  | 0.180155000  |
| C | -3.140515000 | 0.593615000  | -4.576228000 |
| H | -3.690134000 | 0.879032000  | -5.485432000 |
| H | -3.887438000 | 0.438009000  | -3.793204000 |
| C | -2.369780000 | -0.699120000 | -4.832772000 |
| H | -3.069863000 | -1.491374000 | -5.128097000 |
| H | -1.670287000 | -0.560041000 | -5.661723000 |
| C | -0.507052000 | -2.100213000 | -4.044107000 |
| H | -0.933379000 | -2.949786000 | -4.591731000 |
| H | -0.070004000 | -2.504597000 | -3.122824000 |
| C | 0.577783000  | -1.438509000 | -4.860279000 |
| C | 1.294024000  | -2.139010000 | -5.837172000 |
| H | 1.039831000  | -3.169470000 | -6.058680000 |
| C | 2.330347000  | -1.496352000 | -6.521380000 |
| H | 2.895152000  | -2.023012000 | -7.282100000 |
| C | 2.619725000  | -0.161253000 | -6.214573000 |
| H | 3.412098000  | 0.371913000  | -6.725886000 |
| C | 1.859581000  | 0.482823000  | -5.239171000 |
| H | 2.041635000  | 1.517069000  | -4.978233000 |
| C | -2.428847000 | -1.709325000 | -2.514390000 |
| H | -3.123145000 | -0.921815000 | -2.214893000 |
| H | -1.743237000 | -1.868794000 | -1.676158000 |
| C | -3.183146000 | -2.982321000 | -2.841850000 |
| C | -4.497735000 | -2.928318000 | -3.342160000 |
| H | -4.989668000 | -1.967120000 | -3.470224000 |
| C | -5.197619000 | -4.101257000 | -3.645087000 |
| H | -6.212523000 | -4.043451000 | -4.023146000 |
| C | -4.594452000 | -5.348184000 | -3.443845000 |
| H | -5.138406000 | -6.258149000 | -3.671617000 |
| C | -3.294592000 | -5.417932000 | -2.928098000 |
| H | -2.832995000 | -6.382971000 | -2.748895000 |
| C | -2.596938000 | -4.243734000 | -2.627263000 |
| H | -1.599659000 | -4.311844000 | -2.199696000 |
| O | 0.700188000  | 0.033437000  | -1.428462000 |
| S | 2.177571000  | -0.884330000 | -1.415532000 |
| C | 2.000100000  | -1.817946000 | 0.219616000  |
| H | 1.771284000  | -1.093399000 | 1.001096000  |
| H | 2.938434000  | -2.341371000 | 0.409582000  |
| H | 1.182339000  | -2.524671000 | 0.086432000  |
| C | 3.468442000  | 0.398462000  | -0.901923000 |
| H | 4.380524000  | -0.135905000 | -0.630741000 |
| H | 3.640377000  | 1.034578000  | -1.768979000 |
| H | 3.064515000  | 0.965160000  | -0.062575000 |

**BnTPEN: <sup>5</sup>CHD-PrdCHD<sub>O,CHD</sub>**

|    |              |              |              |
|----|--------------|--------------|--------------|
| Fe | -0.882886000 | 0.349334000  | -3.026568000 |
| N  | 0.089267000  | 2.269548000  | -3.486608000 |
| N  | -2.102207000 | 0.901089000  | -1.277140000 |
| N  | -2.528963000 | 1.636268000  | -3.938435000 |
| N  | -2.240701000 | -1.304274000 | -3.790161000 |
| N  | 0.272928000  | -0.601160000 | -4.750406000 |
| C  | 1.244028000  | 2.730574000  | -2.941914000 |
| H  | 1.697468000  | 2.104159000  | -2.183603000 |
| C  | 1.816860000  | 3.938675000  | -3.338689000 |
| H  | 2.737682000  | 4.280139000  | -2.882062000 |
| C  | 1.175553000  | 4.695229000  | -4.327390000 |
| H  | 1.593799000  | 5.640289000  | -4.654539000 |
| C  | -0.021097000 | 4.224198000  | -4.881210000 |
| H  | -0.543800000 | 4.798845000  | -5.637480000 |
| C  | -0.543724000 | 3.004183000  | -4.443589000 |
| C  | -1.827564000 | 2.418368000  | -4.996389000 |
| H  | -2.466150000 | 3.216006000  | -5.403302000 |
| H  | -1.596753000 | 1.733834000  | -5.820905000 |

|   |              |              |              |
|---|--------------|--------------|--------------|
| C | -3.053606000 | 2.523290000  | -2.855662000 |
| H | -4.059157000 | 2.891377000  | -3.101452000 |
| H | -2.402928000 | 3.402970000  | -2.794443000 |
| C | -3.059154000 | 1.842704000  | -1.504178000 |
| C | -3.969372000 | 2.210343000  | -0.506976000 |
| H | -4.728521000 | 2.955758000  | -0.715792000 |
| C | -3.886735000 | 1.612316000  | 0.754169000  |
| H | -4.583080000 | 1.887966000  | 1.537808000  |
| C | -2.896530000 | 0.649635000  | 0.987283000  |
| H | -2.804829000 | 0.162090000  | 1.950032000  |
| C | -2.029920000 | 0.317822000  | -0.051406000 |
| H | -1.262908000 | -0.435363000 | 0.079943000  |
| C | -3.583598000 | 0.710979000  | -4.467371000 |
| H | -4.120236000 | 1.171290000  | -5.309315000 |
| H | -4.315549000 | 0.562908000  | -3.669022000 |
| C | -3.001931000 | -0.632309000 | -4.903868000 |
| H | -3.808332000 | -1.284977000 | -5.261645000 |
| H | -2.306497000 | -0.488257000 | -5.735169000 |
| C | -1.351921000 | -2.378168000 | -4.342391000 |
| H | -1.926058000 | -3.092778000 | -4.944096000 |
| H | -0.951200000 | -2.935057000 | -3.485952000 |
| C | -0.209043000 | -1.810447000 | -5.147309000 |
| C | 0.358334000  | -2.510375000 | -6.217391000 |
| H | -0.057638000 | -3.464801000 | -6.519790000 |
| C | 1.460254000  | -1.966940000 | -6.885408000 |
| H | 1.914238000  | -2.496251000 | -7.715280000 |
| C | 1.961795000  | -0.727498000 | -6.469987000 |
| H | 2.812200000  | -0.273272000 | -6.963767000 |
| C | 1.340719000  | -0.074117000 | -5.406462000 |
| H | 1.688655000  | 0.890164000  | -5.060382000 |
| C | -3.163390000 | -1.888525000 | -2.716187000 |
| H | -3.733103000 | -1.053562000 | -2.304424000 |
| H | -2.499769000 | -2.251894000 | -1.924956000 |
| C | -4.099891000 | -2.990695000 | -3.168606000 |
| C | -5.396572000 | -2.686413000 | -3.624738000 |
| H | -5.742155000 | -1.655374000 | -3.630195000 |
| C | -6.266115000 | -3.700781000 | -4.039528000 |
| H | -7.264428000 | -3.451226000 | -4.382097000 |
| C | -5.853703000 | -5.037657000 | -3.994904000 |
| H | -6.529347000 | -5.825462000 | -4.308926000 |
| C | -4.574459000 | -5.356717000 | -3.523508000 |
| H | -4.260585000 | -6.393201000 | -3.464567000 |
| C | -3.706083000 | -4.340847000 | -3.110957000 |
| H | -2.727030000 | -4.604221000 | -2.718706000 |
| O | 0.705247000  | -0.457175000 | -1.851962000 |
| H | 1.435549000  | -0.949083000 | -2.270918000 |
| C | 2.287047000  | -2.420566000 | 0.382259000  |
| H | 1.831807000  | -3.390704000 | 0.552639000  |
| C | 1.862663000  | -1.305950000 | 1.124233000  |
| C | 3.327536000  | -2.287171000 | -0.548843000 |
| H | 3.678863000  | -3.155664000 | -1.096635000 |
| C | 3.950795000  | -1.042251000 | -0.733330000 |
| C | 2.485417000  | -0.058761000 | 0.938414000  |
| C | 3.532417000  | 0.070400000  | 0.011137000  |
| H | 4.043000000  | 1.021593000  | -0.100502000 |
| H | 4.782779000  | -0.950576000 | -1.424135000 |
| H | 2.190086000  | 0.791206000  | 1.545691000  |
| H | 1.090975000  | -1.419790000 | 1.879557000  |
| H | 0.896712000  | -0.373582000 | -0.892336000 |

**BnTPEN: <sup>5</sup>DMS-RC<sub>N<sub>T</sub>S,DMS</sub>**

|    |              |              |              |
|----|--------------|--------------|--------------|
| Fe | -0.902242000 | 0.332582000  | -3.420711000 |
| N  | -1.867230000 | -1.256845000 | -4.669777000 |
| N  | 0.544069000  | 0.826433000  | -4.783575000 |
| N  | -2.105412000 | 1.379442000  | -4.863238000 |

|   |              |              |              |
|---|--------------|--------------|--------------|
| N | -1.088244000 | 2.303442000  | -2.339830000 |
| N | -2.357631000 | -0.083432000 | -1.887172000 |
| C | -1.449731000 | -2.529178000 | -4.899185000 |
| H | -0.463351000 | -2.793484000 | -4.537392000 |
| C | -2.252825000 | -3.445280000 | -5.584615000 |
| H | -1.891424000 | -4.452987000 | -5.747108000 |
| C | -3.506554000 | -3.040833000 | -6.051136000 |
| H | -4.147907000 | -3.734750000 | -6.582400000 |
| C | -3.917016000 | -1.714683000 | -5.849241000 |
| H | -4.867740000 | -1.363809000 | -6.234869000 |
| C | -3.075219000 | -0.845199000 | -5.158480000 |
| C | -3.396531000 | 0.613881000  | -4.933324000 |
| H | -4.033491000 | 1.002679000  | -5.739181000 |
| H | -3.926916000 | 0.763134000  | -3.987785000 |
| C | -1.381884000 | 1.321184000  | -6.189165000 |
| H | -1.691772000 | 2.160894000  | -6.822621000 |
| H | -1.679116000 | 0.403390000  | -6.704392000 |
| C | 0.107300000  | 1.306177000  | -5.985374000 |
| C | 1.010489000  | 1.692314000  | -6.975395000 |
| H | 0.646144000  | 2.076616000  | -7.921247000 |
| C | 2.384976000  | 1.571115000  | -6.733685000 |
| H | 3.099343000  | 1.862416000  | -7.495157000 |
| C | 2.821721000  | 1.077030000  | -5.500199000 |
| H | 3.874170000  | 0.980402000  | -5.267399000 |
| C | 1.876146000  | 0.714413000  | -4.543607000 |
| H | 2.163046000  | 0.346096000  | -3.569952000 |
| C | -2.294262000 | 2.817194000  | -4.439616000 |
| H | -3.218524000 | 3.217346000  | -4.876594000 |
| H | -1.462700000 | 3.387925000  | -4.860062000 |
| C | -2.310919000 | 2.949468000  | -2.925791000 |
| H | -2.364316000 | 4.006184000  | -2.637486000 |
| H | -3.189656000 | 2.452400000  | -2.507601000 |
| C | -1.326444000 | 1.908976000  | -0.918304000 |
| H | -1.652662000 | 2.766919000  | -0.319146000 |
| H | -0.367333000 | 1.563362000  | -0.516945000 |
| C | -2.327847000 | 0.787369000  | -0.838591000 |
| C | -3.150288000 | 0.607049000  | 0.275301000  |
| H | -3.120805000 | 1.327469000  | 1.084674000  |
| C | -3.995730000 | -0.505928000 | 0.334583000  |
| H | -4.637327000 | -0.662258000 | 1.194111000  |
| C | -3.991765000 | -1.414914000 | -0.727158000 |
| H | -4.614007000 | -2.300823000 | -0.712329000 |
| C | -3.158716000 | -1.178113000 | -1.819218000 |
| H | -3.102591000 | -1.876772000 | -2.637290000 |
| C | 0.174470000  | 3.159011000  | -2.471326000 |
| H | 0.334635000  | 3.317576000  | -3.540323000 |
| H | 0.997224000  | 2.539920000  | -2.102203000 |
| C | 0.131713000  | 4.487339000  | -1.744845000 |
| C | -0.306457000 | 5.652371000  | -2.402844000 |
| H | -0.589782000 | 5.608869000  | -3.452221000 |
| C | -0.347795000 | 6.880281000  | -1.733493000 |
| H | -0.681026000 | 7.770786000  | -2.255321000 |
| C | 0.056208000  | 6.960744000  | -0.395631000 |
| H | 0.029411000  | 7.912428000  | 0.123484000  |
| C | 0.514827000  | 5.813779000  | 0.264154000  |
| H | 0.851812000  | 5.878609000  | 1.293126000  |
| C | 0.556623000  | 4.587029000  | -0.406530000 |
| H | 0.950688000  | 3.711291000  | 0.101295000  |
| N | 0.292286000  | -0.363335000 | -2.267782000 |
| O | -0.752524000 | -2.925150000 | -1.677686000 |
| S | 0.656418000  | -2.190238000 | -2.076873000 |
| O | 1.401490000  | -2.594499000 | -3.486733000 |
| C | 1.860182000  | -2.332663000 | -0.673297000 |
| C | 3.218820000  | -2.357283000 | -0.977182000 |
| C | 1.351350000  | -2.467179000 | 0.616844000  |
| H | 0.283255000  | -2.485064000 | 0.798789000  |
| H | 3.563515000  | -2.290874000 | -2.002415000 |

|   |             |              |              |
|---|-------------|--------------|--------------|
| C | 4.112972000 | -2.521172000 | 0.085145000  |
| H | 5.177095000 | -2.566401000 | -0.121385000 |
| C | 3.656466000 | -2.657005000 | 1.411925000  |
| C | 2.268243000 | -2.624983000 | 1.658161000  |
| C | 4.629902000 | -2.875953000 | 2.543375000  |
| H | 1.902270000 | -2.743137000 | 2.672611000  |
| H | 5.625123000 | -2.493491000 | 2.300693000  |
| H | 4.291141000 | -2.394120000 | 3.465594000  |
| H | 4.735400000 | -3.947678000 | 2.758070000  |
| C | 4.914390000 | 3.826826000  | -2.156675000 |
| S | 4.031563000 | 2.183815000  | -1.840901000 |
| C | 5.146452000 | 1.492517000  | -0.480659000 |
| H | 4.361900000 | 4.338256000  | -2.945816000 |
| H | 4.904696000 | 4.430898000  | -1.248414000 |
| H | 5.938492000 | 3.638886000  | -2.482249000 |
| H | 5.137261000 | 2.161701000  | 0.381045000  |
| H | 4.736760000 | 0.520662000  | -0.202510000 |
| H | 6.161891000 | 1.374011000  | -0.861969000 |

**BnTPEN: <sup>5</sup>DMS-TS1<sub>NTS,DMS</sub>**

|    |              |              |              |
|----|--------------|--------------|--------------|
| Fe | -0.165993000 | 0.604873000  | -2.965558000 |
| N  | -1.220942000 | -1.153583000 | -4.196284000 |
| N  | 1.409078000  | 1.108654000  | -4.425171000 |
| N  | -1.282252000 | 1.442251000  | -4.896179000 |
| N  | -0.689210000 | 2.850981000  | -2.416622000 |
| N  | -1.801613000 | 0.484535000  | -1.532429000 |
| C  | -0.894600000 | -2.470489000 | -4.124091000 |
| H  | -0.023368000 | -2.701920000 | -3.528173000 |
| C  | -1.655314000 | -3.456523000 | -4.755177000 |
| H  | -1.360967000 | -4.495855000 | -4.675974000 |
| C  | -2.790395000 | -3.079633000 | -5.481076000 |
| H  | -3.401338000 | -3.824374000 | -5.978339000 |
| C  | -3.118156000 | -1.721930000 | -5.570367000 |
| H  | -3.978992000 | -1.394662000 | -6.142747000 |
| C  | -2.311456000 | -0.785337000 | -4.919626000 |
| C  | -2.573612000 | 0.696042000  | -4.984430000 |
| H  | -3.113510000 | 0.953177000  | -5.907783000 |
| H  | -3.201440000 | 1.008230000  | -4.143212000 |
| C  | -0.404424000 | 1.141844000  | -6.068032000 |
| H  | -0.674167000 | 1.771746000  | -6.927065000 |
| H  | -0.571310000 | 0.103578000  | -6.369102000 |
| C  | 1.050652000  | 1.317393000  | -5.721781000 |
| C  | 1.999261000  | 1.639548000  | -6.697860000 |
| H  | 1.682237000  | 1.811080000  | -7.720317000 |
| C  | 3.347082000  | 1.737422000  | -6.342259000 |
| H  | 4.094346000  | 1.984270000  | -7.087738000 |
| C  | 3.711091000  | 1.525308000  | -5.007324000 |
| H  | 4.743440000  | 1.605938000  | -4.689653000 |
| C  | 2.720199000  | 1.220872000  | -4.077026000 |
| H  | 2.928005000  | 1.081000000  | -3.025174000 |
| C  | -1.506386000 | 2.916479000  | -4.760228000 |
| H  | -2.326757000 | 3.242456000  | -5.416311000 |
| H  | -0.602003000 | 3.423583000  | -5.104457000 |
| C  | -1.805891000 | 3.285080000  | -3.318677000 |
| H  | -1.968341000 | 4.366628000  | -3.229915000 |
| H  | -2.721176000 | 2.792655000  | -2.978999000 |
| C  | -1.175618000 | 2.785050000  | -1.006207000 |
| H  | -1.690282000 | 3.710902000  | -0.721810000 |
| H  | -0.293413000 | 2.679312000  | -0.370075000 |
| C  | -2.061032000 | 1.588779000  | -0.781018000 |
| C  | -3.045329000 | 1.574180000  | 0.210945000  |
| H  | -3.246125000 | 2.472895000  | 0.782876000  |
| C  | -3.751734000 | 0.393806000  | 0.460458000  |
| H  | -4.515503000 | 0.364480000  | 1.229134000  |



|   |              |              |              |
|---|--------------|--------------|--------------|
| C | -3.452276000 | -0.748964000 | -0.289958000 |
| H | -3.963013000 | -1.686981000 | -0.111813000 |
| C | -2.473028000 | -0.669054000 | -1.276377000 |
| H | -2.192818000 | -1.526528000 | -1.868799000 |
| C | 0.539153000  | 3.751925000  | -2.537648000 |
| H | 0.888386000  | 3.666357000  | -3.568137000 |
| H | 1.295803000  | 3.296533000  | -1.897387000 |
| C | 0.326705000  | 5.209755000  | -2.177431000 |
| C | 0.000132000  | 6.153734000  | -3.169658000 |
| H | -0.079073000 | 5.842080000  | -4.208573000 |
| C | -0.191069000 | 7.500791000  | -2.843466000 |
| H | -0.435627000 | 8.216579000  | -3.620807000 |
| C | -0.051125000 | 7.925748000  | -1.517267000 |
| H | -0.193598000 | 8.970275000  | -1.263163000 |
| C | 0.293384000  | 7.001762000  | -0.523287000 |
| H | 0.426240000  | 7.332394000  | 0.501276000  |
| C | 0.484078000  | 5.655603000  | -0.851802000 |
| H | 0.785744000  | 4.954633000  | -0.078691000 |
| N | 1.334106000  | 0.976364000  | -1.344729000 |
| O | 0.600290000  | -1.047943000 | 0.642310000  |
| S | 1.358368000  | -0.731385000 | -0.774930000 |
| O | 0.537018000  | -1.202390000 | -2.207705000 |
| C | 2.944447000  | -1.715800000 | -0.785941000 |
| C | 3.657024000  | -1.857003000 | -1.974761000 |
| C | 3.342233000  | -2.298041000 | 0.416748000  |
| H | 2.733960000  | -2.193818000 | 1.307592000  |
| H | 3.303787000  | -1.418323000 | -2.899819000 |
| C | 4.831070000  | -2.614533000 | -1.944311000 |
| H | 5.400354000  | -2.747033000 | -2.858450000 |
| C | 5.282563000  | -3.219764000 | -0.753919000 |
| C | 4.521302000  | -3.049298000 | 0.419329000  |
| C | 6.535397000  | -4.060338000 | -0.741721000 |
| H | 4.846706000  | -3.518007000 | 1.342101000  |
| H | 7.215523000  | -3.784300000 | -1.552249000 |
| H | 7.074162000  | -3.964525000 | 0.205705000  |
| H | 6.289244000  | -5.122973000 | -0.867863000 |
| C | 4.181380000  | 1.555412000  | 0.713983000  |
| S | 2.402810000  | 2.182014000  | 0.545565000  |
| C | 1.663035000  | 1.596761000  | 2.196412000  |
| H | 4.685257000  | 1.790161000  | -0.223050000 |
| H | 4.651327000  | 2.096506000  | 1.536883000  |
| H | 4.190170000  | 0.481350000  | 0.897630000  |
| H | 0.794409000  | 2.226981000  | 2.385213000  |
| H | 1.365327000  | 0.551213000  | 2.107887000  |
| H | 2.412484000  | 1.748847000  | 2.974498000  |

**BnTPEN: <sup>5</sup>DMS-Prd<sub>NTS,DMS</sub>**

|    |              |              |              |
|----|--------------|--------------|--------------|
| Fe | -0.697405000 | 0.560146000  | -3.410099000 |
| N  | -1.538381000 | -1.282281000 | -4.242808000 |
| N  | 0.545570000  | 1.073909000  | -5.174495000 |
| N  | -2.241446000 | 1.251912000  | -4.938800000 |
| N  | -1.156217000 | 2.579822000  | -2.520175000 |
| N  | -1.989814000 | 0.146495000  | -1.544291000 |
| C  | -0.959430000 | -2.507040000 | -4.194028000 |
| H  | 0.029853000  | -2.546281000 | -3.755312000 |
| C  | -1.610354000 | -3.645468000 | -4.671242000 |
| H  | -1.122230000 | -4.611054000 | -4.622967000 |
| C  | -2.894494000 | -3.510218000 | -5.213184000 |
| H  | -3.423470000 | -4.375744000 | -5.595730000 |
| C  | -3.486937000 | -2.242396000 | -5.268024000 |
| H  | -4.475088000 | -2.111172000 | -5.694509000 |
| C  | -2.784445000 | -1.140528000 | -4.772533000 |
| C  | -3.349175000 | 0.267454000  | -4.777913000 |
| H  | -4.107370000 | 0.372041000  | -5.568170000 |
| H  | -3.842842000 | 0.470637000  | -3.821217000 |
| C  | -1.635137000 | 1.169153000  | -6.300793000 |

|   |              |              |              |
|---|--------------|--------------|--------------|
| H | -2.141150000 | 1.852081000  | -6.997050000 |
| H | -1.799732000 | 0.155100000  | -6.682287000 |
| C | -0.145914000 | 1.427645000  | -6.294194000 |
| C | 0.503052000  | 1.920884000  | -7.429820000 |
| H | -0.075290000 | 2.207013000  | -8.301363000 |
| C | 1.897559000  | 2.026479000  | -7.432315000 |
| H | 2.416894000  | 2.402622000  | -8.306448000 |
| C | 2.606709000  | 1.631714000  | -6.293733000 |
| H | 3.688168000  | 1.681092000  | -6.261001000 |
| C | 1.902656000  | 1.165571000  | -5.182765000 |
| H | 2.424229000  | 0.847098000  | -4.288178000 |
| C | -2.603893000 | 2.660027000  | -4.581219000 |
| H | -3.617111000 | 2.904717000  | -4.933071000 |
| H | -1.914700000 | 3.313285000  | -5.123123000 |
| C | -2.508298000 | 2.929517000  | -3.080037000 |
| H | -2.740640000 | 3.984576000  | -2.884499000 |
| H | -3.248529000 | 2.330580000  | -2.543370000 |
| C | -1.229646000 | 2.409409000  | -1.034476000 |
| H | -1.665376000 | 3.295539000  | -0.556132000 |
| H | -0.199282000 | 2.303139000  | -0.671154000 |
| C | -2.000870000 | 1.171194000  | -0.653335000 |
| C | -2.646879000 | 1.060712000  | 0.583671000  |
| H | -2.653965000 | 1.903150000  | 1.266251000  |
| C | -3.278253000 | -0.138941000 | 0.921822000  |
| H | -3.786393000 | -0.242576000 | 1.873864000  |
| C | -3.248350000 | -1.200969000 | 0.009849000  |
| H | -3.724565000 | -2.147495000 | 0.235232000  |
| C | -2.597950000 | -1.019311000 | -1.209573000 |
| H | -2.549005000 | -1.813140000 | -1.941790000 |
| C | -0.071573000 | 3.583179000  | -2.896408000 |
| H | 0.003122000  | 3.574159000  | -3.986088000 |
| H | 0.857163000  | 3.163731000  | -2.498037000 |
| C | -0.271580000 | 5.001579000  | -2.398529000 |
| C | -0.884445000 | 5.968419000  | -3.216785000 |
| H | -1.198318000 | 5.704163000  | -4.223773000 |
| C | -1.069845000 | 7.278979000  | -2.762679000 |
| H | -1.539243000 | 8.013854000  | -3.407739000 |
| C | -0.638281000 | 7.643651000  | -1.482234000 |
| H | -0.777903000 | 8.659811000  | -1.130230000 |
| C | -0.011929000 | 6.696253000  | -0.663040000 |
| H | 0.338470000  | 6.979959000  | 0.323713000  |
| C | 0.172522000  | 5.387114000  | -1.119594000 |
| H | 0.676006000  | 4.664075000  | -0.483032000 |
| N | 1.986929000  | 1.339807000  | -0.396551000 |
| O | 0.767249000  | -0.324957000 | -2.183890000 |
| S | 2.297893000  | -0.092814000 | -1.534339000 |
| O | 3.545878000  | 0.137976000  | -2.591151000 |
| C | 2.672730000  | -1.654881000 | -0.588013000 |
| C | 3.718917000  | -2.452729000 | -1.046336000 |
| C | 1.890710000  | -1.975329000 | 0.519635000  |
| H | 1.086851000  | -1.327237000 | 0.849094000  |
| H | 4.297624000  | -2.159083000 | -1.914449000 |
| C | 3.992985000  | -3.630496000 | -0.344089000 |
| H | 4.805420000  | -4.267469000 | -0.678032000 |
| C | 3.236394000  | -4.002496000 | 0.784624000  |
| C | 2.188375000  | -3.157671000 | 1.203635000  |
| C | 3.531103000  | -5.288434000 | 1.517725000  |
| H | 1.601587000  | -3.427289000 | 2.075548000  |
| H | 4.600199000  | -5.520577000 | 1.507876000  |
| H | 3.200752000  | -5.244130000 | 2.559225000  |
| H | 3.012045000  | -6.132816000 | 1.045084000  |
| C | 4.515029000  | 2.839031000  | -1.267571000 |
| S | 3.512206000  | 2.153983000  | 0.205145000  |
| C | 4.738217000  | 0.872196000  | 0.898849000  |
| H | 4.681741000  | 2.029340000  | -1.976413000 |
| H | 3.907680000  | 3.636562000  | -1.693454000 |
| H | 5.438750000  | 3.237904000  | -0.845358000 |

|   |             |             |             |
|---|-------------|-------------|-------------|
| H | 5.547334000 | 1.445819000 | 1.353402000 |
| H | 4.195815000 | 0.303083000 | 1.652142000 |
| H | 5.099432000 | 0.237078000 | 0.091026000 |

**BnTPEN: <sup>5</sup>CHD-PrdCHD<sub>NTS,CHD</sub>**

|    |              |              |              |
|----|--------------|--------------|--------------|
| Fe | -0.578243000 | 0.731903000  | -3.019228000 |
| N  | -1.317346000 | -1.169197000 | -3.835713000 |
| N  | 0.699557000  | 1.250755000  | -4.733673000 |
| N  | -2.088580000 | 1.332096000  | -4.610051000 |
| N  | -1.117180000 | 2.776780000  | -2.206452000 |
| N  | -1.798094000 | 0.338372000  | -1.150057000 |
| C  | -0.696577000 | -2.372584000 | -3.758455000 |
| H  | 0.282151000  | -2.369543000 | -3.295052000 |
| C  | -1.293092000 | -3.538431000 | -4.240517000 |
| H  | -0.772534000 | -4.485413000 | -4.167850000 |
| C  | -2.564884000 | -3.455252000 | -4.820339000 |
| H  | -3.052019000 | -4.343180000 | -5.207105000 |
| C  | -3.198429000 | -2.209495000 | -4.909654000 |
| H  | -4.176443000 | -2.117724000 | -5.368582000 |
| C  | -2.550365000 | -1.077913000 | -4.406880000 |
| C  | -3.163494000 | 0.309409000  | -4.457832000 |
| H  | -3.901291000 | 0.369785000  | -5.271535000 |
| H  | -3.693900000 | 0.516802000  | -3.521330000 |
| C  | -1.431581000 | 1.240317000  | -5.948270000 |
| H  | -1.936310000 | 1.887909000  | -6.678047000 |
| H  | -1.543424000 | 0.212249000  | -6.310959000 |
| C  | 0.045313000  | 1.556658000  | -5.888855000 |
| C  | 0.725930000  | 2.055978000  | -7.002723000 |
| H  | 0.178567000  | 2.303503000  | -7.905438000 |
| C  | 2.113771000  | 2.220057000  | -6.941305000 |
| H  | 2.657757000  | 2.604377000  | -7.796672000 |
| C  | 2.785047000  | 1.874442000  | -5.764200000 |
| H  | 3.860511000  | 1.972917000  | -5.683293000 |
| C  | 2.050083000  | 1.396363000  | -4.678883000 |
| H  | 2.534851000  | 1.108567000  | -3.755248000 |
| C  | -2.519175000 | 2.733687000  | -4.301167000 |
| H  | -3.532816000 | 2.923717000  | -4.683644000 |
| H  | -1.845349000 | 3.401558000  | -4.844334000 |
| C  | -2.471535000 | 3.044870000  | -2.806693000 |
| H  | -2.758882000 | 4.091687000  | -2.643681000 |
| H  | -3.194496000 | 2.423982000  | -2.270282000 |
| C  | -1.224797000 | 2.668275000  | -0.717416000 |
| H  | -1.726913000 | 3.544600000  | -0.289505000 |
| H  | -0.201366000 | 2.627060000  | -0.324057000 |
| C  | -1.925321000 | 1.398725000  | -0.309553000 |
| C  | -2.616073000 | 1.291903000  | 0.903242000  |
| H  | -2.716012000 | 2.160400000  | 1.544393000  |
| C  | -3.169670000 | 0.063173000  | 1.270742000  |
| H  | -3.711498000 | -0.037571000 | 2.204356000  |
| C  | -3.017914000 | -1.033483000 | 0.412679000  |
| H  | -3.430491000 | -2.003139000 | 0.663514000  |
| C  | -2.330003000 | -0.856965000 | -0.785888000 |
| H  | -2.188588000 | -1.675081000 | -1.478042000 |
| C  | -0.070645000 | 3.817257000  | -2.597485000 |
| H  | 0.043302000  | 3.759233000  | -3.682190000 |
| H  | 0.864312000  | 3.470484000  | -2.147828000 |
| C  | -0.366174000 | 5.244352000  | -2.178181000 |
| C  | -1.014543000 | 6.131356000  | -3.057503000 |
| H  | -1.283906000 | 5.801073000  | -4.057988000 |
| C  | -1.290929000 | 7.448236000  | -2.673646000 |
| H  | -1.786227000 | 8.121212000  | -3.365229000 |
| C  | -0.915329000 | 7.899599000  | -1.403271000 |
| H  | -1.124461000 | 8.921141000  | -1.105373000 |
| C  | -0.252734000 | 7.033540000  | -0.524777000 |
| H  | 0.057558000  | 7.386750000  | 0.452888000  |
| C  | 0.022533000  | 5.717759000  | -0.911025000 |

|   |             |              |              |
|---|-------------|--------------|--------------|
| H | 0.560203000 | 5.060930000  | -0.232604000 |
| N | 1.721650000 | 1.432781000  | 0.033661000  |
| O | 1.033954000 | -0.291515000 | -1.959062000 |
| S | 2.222543000 | 0.116997000  | -0.881903000 |
| O | 3.641141000 | 0.386384000  | -2.024100000 |
| C | 2.814693000 | -1.387445000 | 0.050466000  |
| C | 3.660238000 | -2.296501000 | -0.585155000 |
| C | 2.333497000 | -1.557795000 | 1.346767000  |
| H | 1.667349000 | -0.833231000 | 1.801386000  |
| H | 4.016574000 | -2.119938000 | -1.592201000 |
| C | 4.052102000 | -3.424760000 | 0.137886000  |
| H | 4.717431000 | -4.144174000 | -0.328213000 |
| C | 3.606359000 | -3.643322000 | 1.459101000  |
| C | 2.745609000 | -2.696437000 | 2.046389000  |
| C | 4.052459000 | -4.866299000 | 2.221212000  |
| H | 2.392791000 | -2.850037000 | 3.060431000  |
| H | 5.141565000 | -4.873828000 | 2.349780000  |
| H | 3.598160000 | -4.912315000 | 3.213731000  |
| H | 3.787362000 | -5.784797000 | 1.684653000  |
| H | 6.453535000 | 2.701782000  | -1.759738000 |
| H | 4.374311000 | 0.847375000  | -1.525862000 |
| C | 5.987826000 | 2.525190000  | -0.795232000 |
| C | 6.153421000 | 1.285533000  | -0.152177000 |
| H | 6.757484000 | 0.510335000  | -0.614238000 |
| H | 5.749837000 | 0.130545000  | 1.630121000  |
| C | 5.593859000 | 1.075046000  | 1.119323000  |
| C | 4.875031000 | 2.103065000  | 1.746189000  |
| H | 4.484032000 | 1.957693000  | 2.748765000  |
| H | 2.473948000 | 1.655574000  | 0.717043000  |
| H | 4.181535000 | 4.145430000  | 1.601347000  |
| C | 4.711034000 | 3.340585000  | 1.101715000  |
| C | 5.263900000 | 3.550296000  | -0.168078000 |
| H | 5.157352000 | 4.513953000  | -0.654641000 |
